# Supplementary material for: Copper-catalyzed fluoroalkylation of alkynes, and alkynyl & vinyl carboxylic acids with fluoroalkyl halides
Source: Royal Society of Chemistry journal article supplement (doi:10.1039/c7ob00641a), 2017-01-01

## Supporting Information

### Copper-Catalyzed Fluoroalkylation of Alkynes, and Alkynyl & Vinyl Carboxylic Acids with Fluoroalkyl halides

Jing-Jing Ma and Wen-Bin Yi\*

*School of Chemical Engineering, Nanjing University of Science and Technology, Xiao Ling*

*Wei Street, Nanjing 210094, People's Republic of China*

\*Corresponding author. Fax: +86-25-84315030; Tel.: +86-25-84315514; E-mail: [yiwenbin@njust.edu.cn](mailto:yiwenbin@njust.edu.cn)

#### 1. General Considerations

Unless otherwise mentioned, solvents and reagents were purchased from commercial sources and used without further purification.  $^1\text{H}$ ,  $^{19}\text{F}$  and  $^{13}\text{C}$  NMR spectra were recorded on a 500 MHz Bruker DRX 500 and tetramethylsilane (TMS) was used as a reference. Chemical shifts were reported in parts per million (ppm),  $^1\text{H}$  NMR chemical shifts were determined relative to internal  $(\text{CH}_3)_4\text{Si}$  (TMS) at  $\delta$  0.0 (sometimes may be two points) or to the signal of a residual protonated solvent:  $\text{CDCl}_3$   $\delta$  7.26 (due to the quality of  $\text{CDCl}_3$  the water peak may move to about 1.6 ppm).  $^{13}\text{C}$  NMR chemical shifts were determined relative to internal TMS at  $\delta$  0.0. Data for  $^1\text{H}$ ,  $^{13}\text{C}$  and  $^{19}\text{F}$  NMR are recorded as follows: chemical shift ( $\delta$ , ppm), multiplicity (s = singlet, d = doublet, t = triplet, m = multiplet, q = quartet, br = broad). GC-MS were performed on an ISQ Trace 1300 (electrospray ionization: EI). HRMS were recorded on the Waters Micromass GCT Premier (electrospray ionization:  $\text{EI}^+$ ).

#### 2. Screening Results

In a sealed glass vial, phenylacetylene (**1a**, 0.2 mmol), ethyl bromodifluoroacetate (**2a**, 1.5 equiv.), catalyst and ligand were dissolved in dry solvent under argon atmosphere following the condition listed in the table below. The mixture was stirred for 24 h. After cooling to room temperature, the reaction mixture was quenched and trifluoroacetophenone (0.2 mmol, 28  $\mu\text{l}$ ) was added as an internal standard. The solution was analyzed by  $^{19}\text{F}$  NMR to give the yield.

##### 2.1 Screening ligands

Table S1

| <div style="text-align: center;">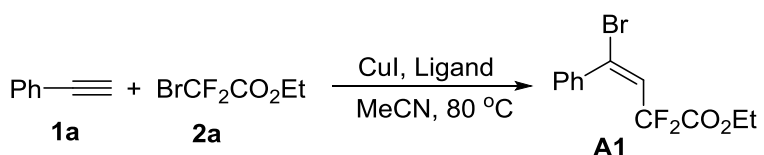</div> |                |       |
|-----------------------------------------------------------------------------------------------------------------------------|----------------|-------|
| Entry                                                                                                                       | Ligand/ (mol%) | Yield |
| 1                                                                                                                           | L1 (30)        | n.r.  |
| 2                                                                                                                           | L2 (30)        | 47%   |
| 3                                                                                                                           | L3 (30)        | trace |

|    |         |       |
|----|---------|-------|
| 4  | L4 (30) | trace |
| 5  | L5 (30) | 87%   |
| 6  | L6 (30) | 11%   |
| 7  | L7 (30) | n.r.  |
| 8  | /       | n.r.  |
| 9  | L5 (10) | 30%   |
| 10 | L5 (15) | 42%   |
| 11 | L5 (20) | 59%   |
| 12 | L5 (40) | 84%   |

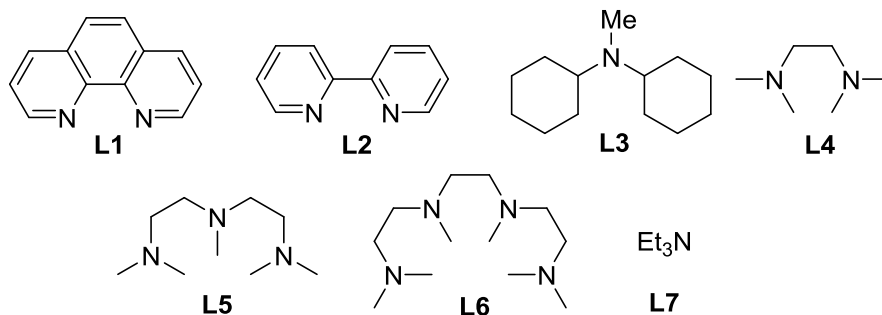

Reaction conditions: **1a** (0.2 mmol), **2a** (0.3 mmol), CuI (15 mol%), ligand (30 mol%), MeCN (1mL), under argon, 80 °C for 24 h, determined by <sup>19</sup>F NMR using trifluoroacetophenone as the internal standard. n.r. = no reaction.

## 2.2 Screening copper catalysts

Table S2

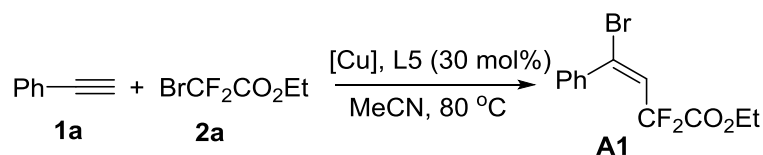

| Entry | [Cu] (mol%)               | Yield |
|-------|---------------------------|-------|
| 1     | CuCl (15)                 | 94%   |
| 2     | CuBr (15)                 | 44%   |
| 3     | CuI (15)                  | 87%   |
| 4     | Cu(OTf) <sub>2</sub> (15) | 32%   |
| 5     | Cu <sub>2</sub> O (15)    | 62%   |
| 6     | /                         | n.r.  |
| 7     | CuCl (5)                  | 39%   |
| 8     | CuCl (10)                 | 80%   |
| 9     | CuCl (20)                 | 51%   |
| 10    | CuCl (25)                 | 69%   |

Reaction conditions: **1a** (0.2 mmol), **2a** (0.3 mmol), L5 (30 mol%), MeCN (1mL), under argon, 80 °C for 24 h, determined by <sup>19</sup>F NMR using trifluoroacetophenone as the internal standard. n.r. = no reaction.

## 2.3 Screening temperature and solvents

Table S3

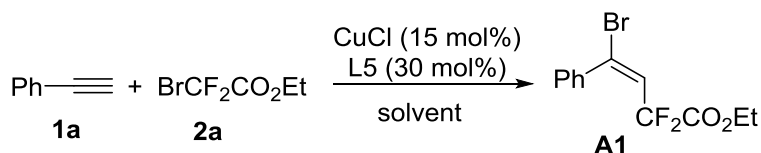

| Entry | Solvent     | Tem. (°C) | Yield |
|-------|-------------|-----------|-------|
| 1     | MeCN        | r.t.      | n.r.  |
| 2     | MeCN        | 40        | 21%   |
| 3     | MeCN        | 60        | 41%   |
| 4     | MeCN        | 80        | 94%   |
| 5     | MeCN        | 100       | 45%   |
| 6     | Toluene     | 80        | 11%   |
| 7     | DMSO        | 80        | 12%   |
| 8     | DMF         | 80        | trace |
| 9     | EtOH        | 80        | 42%   |
| 10    | 1,4-dioxane | 80        | trace |

Reaction conditions: **1a** (0.2 mmol), **2a** (0.3 mmol), CuCl (15 mol%), L5 (30 mol%), solvent (1mL), under argon for 24 h, determined by

<sup>19</sup>F NMR using trifluoroacetophenone as the internal standard. n.r. = no reaction.

Initially, we started our investigation by exploring the reaction between phenylacetylene (**1a**) and **2a** (Table S1-S3). After screening, the ligand had a significant influence on the reaction results. bis(2-dimethylaminoethyl) methylamine (L5) was found to be the most suitable choice in the presence of 15 mol% CuI, giving **A1** in 87% yield with > 90% *E*-selectivity (Table S1, entries 1-7). Further study was focused on various copper catalysts and CuCl seemed best (Table S2, entries 1-5). It was worth to mention that no product was detected when the reaction performed in the absence of the catalyst or the ligand, as well as argon. Other solvents such as toluene, DMSO, DMF, EtOH, 1,4-dioxane were also tested (Table S3), with no elevated yield. Allow for the amount of ligand and copper catalyst, as well as temperature, the optimal reaction condition was carried out with CuCl (15 mol%), L5 (30 mol%), MeCN as solvent refluxed at 80 °C under argon atmosphere for 24 h (Table S3, entry 4).

### 3. General Procedure for Experiments

#### Method I:

CuCl-catalyzed ATRA reaction:

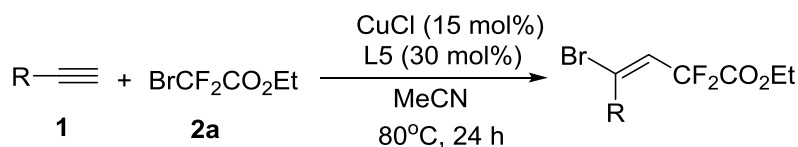

A reaction tube was charged with CuCl (3.0 mg, 0.03 mmol), L5 (10.4 mg, 0.06 mmol) at room temperature, then phenylacetylene (**1a**) (20.4 mg, 0.2 mmol), ethyl bromodifluoroacetate (60.9 mg, 0.3 mmol) and MeCN (1 mL) were added. The resulting mixture was stirred at 80 °C under argon atmosphere for 24 h. After cooling to room temperature, the reaction mixture was quenched and purified by flash silica gel column chromatography (eluent: petroleum ether/EtOAc) to afford the desired product **A1** (54.1 mg, 89%).

## Method II:

CuI-catalyzed ATRA reaction:

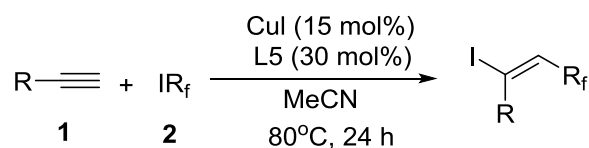

A reaction tube was charged with CuI (5.7 mg, 0.03 mmol), L5 (10.4 mg, 0.06 mmol) at room temperature, then phenylacetylene (**1a**) (20.4 mg, 0.2 mmol), ethyl iododifluoroacetate (**2b**) (75.0 mg, 0.3 mmol) and MeCN (1 mL) were added. The resulting mixture was stirred at 80 °C under argon atmosphere for 24 h. After cooling to room temperature, the reaction mixture was quenched and purified by flash silica gel column chromatography (eluent: petroleum ether/EtOAc) to afford the desired product **A17** (59.8 mg, 85%).

## Method III:

Decarboxylative ATRA of fluoroalkyl halides to alkynyl carboxylic acids:

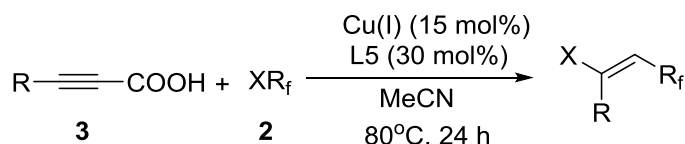

A reaction tube was charged with CuCl (3.0 mg, 0.03 mmol), L5 (10.4 mg, 0.06 mmol) at room temperature, then phenylpropionic acid (**3a**) (29.2 mg, 0.2 mmol), ethyl bromodifluoroacetate (**2a**) (60.9 mg, 0.3 mmol) and MeCN (1 mL) were added. The resulting mixture was stirred at 80 °C under argon atmosphere for 24 h. After cooling to room temperature, the reaction mixture was quenched and purified by flash silica gel column chromatography (eluent: petroleum ether/EtOAc) to afford the desired product **A1** (47.4 mg, 78%).

## Method IV:

Decarboxylative perfluoroalkylation of  $\alpha, \beta$ -unsaturated carboxylic acids:

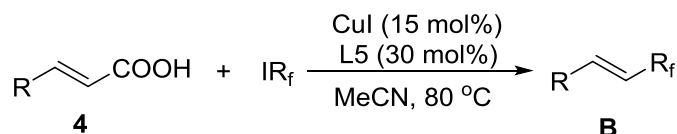

A reaction tube was charged with CuI (5.7 mg, 0.03 mmol), L5 (10.4 mg, 0.06 mmol) at room temperature, then 4-phenylcinnamic acid (**4a**) (44.8 mg, 0.2 mmol), pentafluoroethyl iodide (98.4 mg, 0.4 mmol) and MeCN (1 mL) were added. The resulting mixture was stirred at 80 °C under argon atmosphere for 24 h. After cooling to room temperature, the reaction mixture was quenched and purified by flash silica gel column chromatography (eluent: petroleum ether) to afford the desired product **B1** (23.2 mg, 39%).

Hydrolysis-decarboxylative reaction of **A** compounds:

To a methanol (5 mL) solution of **A** (0.5 mmol) was added 1 M K<sub>2</sub>CO<sub>3</sub> (5 mL) at room temperature. After the reaction was complete (as judged by TLC analysis), the pH value was adjusted to 2~4. Then

the mixture was poured into a separatory funnel containing 10 mL H<sub>2</sub>O and 10 mL EtOAc. The layers were separated and the aqueous layer was extracted with EtOAc (3 × 10 mL). The combined organic layers were dried with MgSO<sub>4</sub> and concentrated under reduced pressure after filtration. The crude product was followed by decarboxylative step, added 10 equiv KF in 2ml anhydrous DMF, refluxed at 170 °C under argon atmosphere for 6-10 h, after cooled to the room temperature and purified by flash chromatography on silica gel (eluent: petroleum ether) to afford the desired product C.

#### 4. Analytical data of compounds

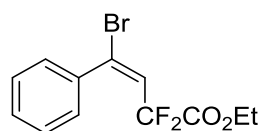

Chemical Formula: C<sub>12</sub>H<sub>11</sub>BrF<sub>2</sub>O<sub>2</sub>  
Exact Mass: 303.99

Compound **A1**<sup>1</sup>: purified by column chromatography on silica gel (petroleum ether/EtOAc = 20:1) to afford the **A1** (54.1 mg, 89%), yellow liquid (*E/Z* = 94:6, the ratio detected by <sup>19</sup>F NMR). <sup>1</sup>H NMR (500 MHz, CDCl<sub>3</sub>) δ 7.36 (s, 5H), 6.50 (t, *J* = 11.2 Hz, 1H), 3.99 (q, *J* = 7.2 Hz, 2H), 1.19 (t, *J* = 7.2 Hz, 3H); <sup>13</sup>C NMR (126 MHz, CDCl<sub>3</sub>) δ 162.53 (t, *J* = 32.5 Hz), 137.21, 133.59 (t, *J* = 10.2 Hz), 129.98, 128.51 (t, *J* = 2.2 Hz), 128.14, 125.07 (t, *J* = 28.6 Hz), 111.08, 99.99, 63.17, 13.71; <sup>19</sup>F NMR (470 MHz, CDCl<sub>3</sub>) δ -93.72. GC-MS (EI) Calcd. for C<sub>12</sub>H<sub>11</sub>BrF<sub>2</sub>O<sub>2</sub> 303.99, found 304.07.

Z product: <sup>19</sup>F NMR (470 MHz, CDCl<sub>3</sub>) δ -97.61.

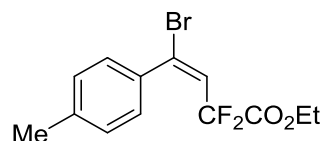

Chemical Formula: C<sub>13</sub>H<sub>13</sub>BrF<sub>2</sub>O<sub>2</sub>  
Exact Mass: 318.01

Compound **A2**: purified by column chromatography on silica gel (petroleum ether/EtOAc = 20:1) to afford the **A2** (51.5 mg, 81%), yellow liquid. <sup>1</sup>H NMR (500 MHz, CDCl<sub>3</sub>) δ 7.21-7.16 (m, 2H), 7.08 (d, *J* = 7.7 Hz, 2H), 6.39 (t, *J* = 11.1 Hz, 1H), 3.92 (q, *J* = 7.2 Hz, 2H), 2.28 (s, 3H), 1.12 (t, *J* = 7.2 Hz, 3H). <sup>13</sup>C NMR (126 MHz, CDCl<sub>3</sub>) δ 162.70 (t, *J* = 33.1 Hz), 140.37, 134.49, 134.09, 128.89, 128.60, 124.78 (t, *J* = 28.4 Hz), 111.25 (t, *J* = 248.5 Hz), 63.23, 21.47, 13.78; <sup>19</sup>F NMR (470 MHz, CDCl<sub>3</sub>) δ -93.59. GC-MS (EI) Calcd. for C<sub>13</sub>H<sub>13</sub>BrF<sub>2</sub>O<sub>2</sub> 318.01, found 318.04.

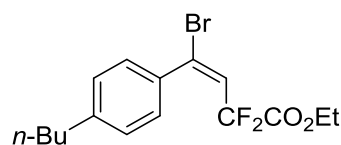

Chemical Formula: C<sub>16</sub>H<sub>19</sub>BrF<sub>2</sub>O<sub>2</sub>  
Exact Mass: 360.05

Compound **A3**: purified by column chromatography on silica gel (petroleum ether/EtOAc = 20:1) to afford the **A3** (56.9 mg, 79%), yellow liquid. <sup>1</sup>H NMR (500 MHz, CDCl<sub>3</sub>) δ 7.28 (d, *J* = 8.2 Hz, 2H), 7.15 (d, *J* = 8.1 Hz, 2H), 6.46 (t, *J* = 11.0 Hz, 1H), 3.95 (q, *J* = 7.1 Hz, 2H), 2.68-2.54 (m, 2H), 1.65-1.52 (m, 3H), 1.43-1.30 (m, 2H), 1.17 (t, *J* = 7.2 Hz, 3H), 0.93 (t, *J* = 7.3 Hz, 3H); <sup>13</sup>C NMR (126 MHz, CDCl<sub>3</sub>) δ 162.65 (t, *J* = 33.4 Hz), 145.37, 134.56, 134.14, 128.64, 128.23, 124.75 (t, *J* = 28.8 Hz), 111.26 (t, *J* = 248.3 Hz), 63.17, 35.56, 33.41, 22.43, 13.89 (d, *J* = 26.6 Hz); <sup>19</sup>F NMR (470 MHz, CDCl<sub>3</sub>) δ -93.19. GC-MS (EI) Calcd. for C<sub>16</sub>H<sub>19</sub>BrF<sub>2</sub>O<sub>2</sub> 360.05, HRMS (EI<sup>+</sup>) found 360.0542.

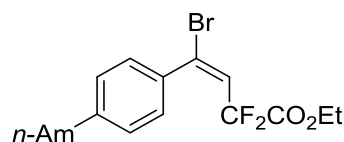

Chemical Formula:  $C_{17}H_{21}BrF_2O_2$   
Exact Mass: 374.07

Compound **A4**: purified by column chromatography on silica gel (petroleum ether/EtOAc = 20:1) to afford the **A4** (56.1 mg, 75%), brown liquid.  $^1H$  NMR (500 MHz,  $CDCl_3$ )  $\delta$  7.28 (d,  $J$  = 7.9 Hz, 2H), 7.15 (d,  $J$  = 8.0 Hz, 2H), 6.46 (t,  $J$  = 11.0 Hz, 1H), 3.95 (q,  $J$  = 7.2 Hz, 2H), 2.64-2.56 (m, 2H), 1.65-1.56 (m, 2H), 1.31 (qq,  $J$  = 8.7, 5.5, 3.8 Hz, 4H), 1.17 (t,  $J$  = 7.2 Hz, 3H), 0.89 (t,  $J$  = 6.8 Hz, 3H);  $^{13}C$  NMR (126 MHz,  $CDCl_3$ )  $\delta$  162.68 (t,  $J$  = 33.2 Hz), 145.43, 134.56, 134.13 (d,  $J$  = 9.8 Hz), 128.66, 128.23, 124.77 (t,  $J$  = 28.8 Hz), 111.27 (t,  $J$  = 248.7 Hz), 63.20, 35.85, 31.57, 30.95, 22.61, 14.10, 13.78;  $^{19}F$  NMR (470 MHz,  $CDCl_3$ )  $\delta$  -93.12. GC-MS (EI) Calcd. for  $C_{17}H_{21}BrF_2O_2$  374.07, HRMS ( $EI^+$ ) found 374.0698.

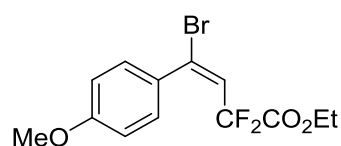

Chemical Formula:  $C_{13}H_{13}BrF_2O_3$   
Exact Mass: 334.00

Compound **A5**<sup>1</sup>: purified by column chromatography on silica gel (petroleum ether/EtOAc = 12:1) to afford the **A5** (45.4 mg, 68%), brown liquid.  $^1H$  NMR (500 MHz,  $CDCl_3$ )  $\delta$  7.32 (d,  $J$  = 8.8 Hz, 2H), 6.86 (d,  $J$  = 8.8 Hz, 2H), 6.44 (t,  $J$  = 11.0 Hz, 1H), 3.99 (q,  $J$  = 7.2 Hz, 2H), 3.82 (s, 3H), 1.19 (t,  $J$  = 7.2 Hz, 3H);  $^{13}C$  NMR (126 MHz,  $CDCl_3$ )  $\delta$  161.59 (t,  $J$  = 33.4 Hz), 159.79, 132.94 (t,  $J$  = 10.1 Hz), 129.30, 128.37, 123.30 (t,  $J$  = 28.7 Hz), 112.43, 109.19 (d,  $J$  = 247.8 Hz), 62.13, 54.33, 12.69;  $^{19}F$  NMR (470 MHz,  $CDCl_3$ )  $\delta$  -93.21. GC-MS (EI) Calcd. for  $C_{13}H_{13}BrF_2O_3$  334.00, found 334.02.

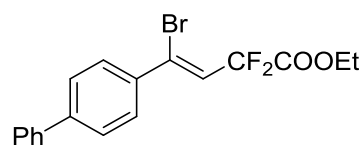

Chemical Formula:  $C_{18}H_{15}BrF_2O_2$   
Exact Mass: 380.02

Compound **A6**: purified by column chromatography on silica gel (petroleum ether/EtOAc = 40:1) to afford the **A6** (67.6 mg, 89%), yellow liquid.  $^1H$  NMR (500 MHz,  $CDCl_3$ )  $\delta$  7.64-7.57 (m, 5H), 7.50-7.43 (m, 4H), 7.43-7.35 (m, 1H), 6.54 (t,  $J$  = 11.2 Hz, 1H), 4.02 (q,  $J$  = 7.2 Hz, 2H), 1.20 (t,  $J$  = 7.1 Hz, 3H);  $^{13}C$  NMR (126 MHz,  $CDCl_3$ )  $\delta$  162.71 (t,  $J$  = 33.2 Hz), 142.94, 140.03, 136.12, 133.58, 129.13 (d,  $J$  = 18.3 Hz), 128.10, 127.25, 126.89, 125.15 (t,  $J$  = 28.4 Hz), 111.26 (t,  $J$  = 248.8 Hz), 63.39, 13.86;  $^{19}F$  NMR (470 MHz,  $CDCl_3$ )  $\delta$  -93.60. GC-MS (EI) Calcd. for  $C_{18}H_{15}BrF_2O_2$  380.02, HRMS ( $EI^+$ ) found 380.0220.

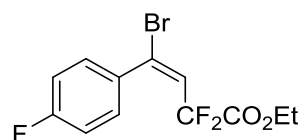

Chemical Formula:  $C_{12}H_{10}BrF_3O_2$   
Exact Mass: 321.98

Compound **A7**<sup>1</sup>: purified by column chromatography on silica gel (petroleum ether/EtOAc = 40:1) to afford the **A7** (56.0 mg, 87%), yellow liquid.  $^1H$  NMR (500 MHz,  $CDCl_3$ )  $\delta$  7.47-7.32 (m, 2H), 7.05 (dd,  $J$  = 9.6, 7.7 Hz, 2H), 6.49 (t,  $J$  = 11.3 Hz, 1H), 4.07 (q,  $J$  = 7.2 Hz, 2H), 1.23 (t,  $J$  = 7.1 Hz, 3H);  $^{13}C$  NMR (126 MHz,  $CDCl_3$ )  $\delta$  163.31, 161.31 (t,  $J$  = 28.7 Hz), 132.33 (d,  $J$  = 14.5 Hz), 131.95, 131.46

(t,  $J = 8.8$  Hz), 129.64 (d,  $J = 9.6$  Hz), 124.28 (t,  $J = 28.2$  Hz), 114.27 (d,  $J = 22.2$  Hz), 109.96 (t,  $J = 249.6$  Hz), 62.32, 12.72;  $^{19}\text{F}$  NMR (470 MHz,  $\text{CDCl}_3$ )  $\delta$  -94.36, -109.84. GC-MS (EI) Calcd. for  $\text{C}_{12}\text{H}_{10}\text{BrF}_3\text{O}_2$  321.98, found 322.02.

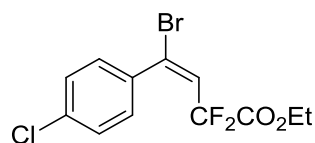

Chemical Formula:  $\text{C}_{12}\text{H}_{10}\text{BrClF}_2\text{O}_2$   
Exact Mass: 337.95

Compound **A8**: purified by column chromatography on silica gel (petroleum ether/EtOAc = 20:1) to afford the **A8** (60.2 mg, 89%), yellow liquid.  $^1\text{H}$  NMR (500 MHz,  $\text{CDCl}_3$ )  $\delta$  7.29-7.21 (m, 4H), 6.42 (t,  $J = 11.5$  Hz, 1H), 4.02 (q,  $J = 7.2$  Hz, 2H), 1.17 (t,  $J = 7.2$  Hz, 3H);  $^{13}\text{C}$  NMR (126 MHz,  $\text{CDCl}_3$ )  $\delta$  162.48 (t,  $J = 33.3$  Hz), 136.18, 135.81, 132.29, 129.95, 128.53, 125.56 (t,  $J = 27.9$  Hz), 111.06 (t,  $J = 250.4$  Hz), 63.47, 13.85;  $^{19}\text{F}$  NMR (470 MHz,  $\text{CDCl}_3$ )  $\delta$  -91.61. GC-MS (EI) Calcd. for  $\text{C}_{12}\text{H}_{10}\text{BrClF}_2\text{O}_2$  337.95, HRMS ( $\text{EI}^+$ ) found 337.9523.

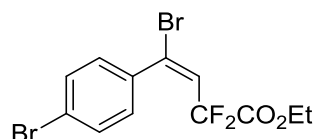

Chemical Formula:  $\text{C}_{12}\text{H}_{10}\text{Br}_2\text{F}_2\text{O}_2$   
Exact Mass: 381.90

Compound **A9**<sup>1</sup>: purified by column chromatography on silica gel (petroleum ether/EtOAc = 20:1) to afford the **A9** (64.2 mg, 84%), yellow liquid.  $^1\text{H}$  NMR (500 MHz,  $\text{CDCl}_3$ )  $\delta$  7.50 (d,  $J = 8.4$  Hz, 2H), 7.24 (d,  $J = 8.5$  Hz, 2H), 6.49 (t,  $J = 11.5$  Hz, 1H), 4.09 (d,  $J = 7.1$  Hz, 2H), 1.24 (t,  $J = 7.2$  Hz, 3H);  $^{13}\text{C}$  NMR (126 MHz,  $\text{CDCl}_3$ )  $\delta$  162.63 (t,  $J = 34.0$  Hz), 136.29, 132.31, 131.51, 130.14, 125.55 (t,  $J = 28.0$  Hz), 124.47, 111.06 (t,  $J = 249.5$  Hz), 63.50, 13.85;  $^{19}\text{F}$  NMR (470 MHz,  $\text{CDCl}_3$ )  $\delta$  -94.65. GC-MS (EI) Calcd. for  $\text{C}_{12}\text{H}_{10}\text{Br}_2\text{F}_2\text{O}_2$  381.90, found 381.96.

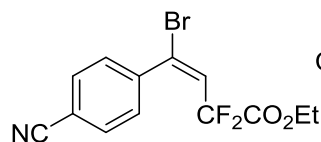

Chemical Formula:  $\text{C}_{13}\text{H}_{10}\text{BrF}_2\text{NO}_2$   
Exact Mass: 328.99

Compound **A10**: purified by column chromatography on silica gel (petroleum ether/EtOAc = 20:1) to afford the **A10** (57.2 mg, 87%), yellow liquid.  $^1\text{H}$  NMR (500 MHz,  $\text{CDCl}_3$ )  $\delta$  7.69-7.64 (m, 2H), 7.50-7.45 (m, 2H), 6.55 (t,  $J = 12.0$  Hz, 1H), 4.18 (q,  $J = 7.2$  Hz, 2H), 1.28 (t,  $J = 7.1$  Hz, 3H);  $^{13}\text{C}$  NMR (126 MHz,  $\text{CDCl}_3$ )  $\delta$  162.48 (t,  $J = 33.3$  Hz), 141.85, 132.04, 130.84, 129.21, 126.22 (t,  $J = 26.9$  Hz), 118.07, 113.71, 110.88 (t,  $J = 251.9$  Hz), 63.70, 13.93;  $^{19}\text{F}$  NMR (470 MHz,  $\text{CDCl}_3$ )  $\delta$  -95.90. GC-MS (EI) Calcd. for  $\text{C}_{13}\text{H}_{10}\text{BrF}_2\text{NO}_2$  328.99, found 328.98.

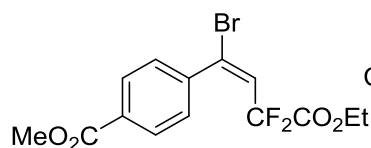

Chemical Formula:  $\text{C}_{14}\text{H}_{13}\text{BrF}_2\text{O}_4$   
Exact Mass: 362.00

Compound **A11**: purified by column chromatography on silica gel (petroleum ether/EtOAc = 15:1) to afford the **A11** (64.2 mg, 73%), yellow liquid.  $^1\text{H}$  NMR (500 MHz,  $\text{CDCl}_3$ )  $\delta$  8.07-7.99 (m, 2H), 7.43 (dd,  $J = 8.7, 2.1$  Hz, 2H), 6.54 (t,  $J = 11.6$  Hz, 1H), 4.08 (q,  $J = 7.2$  Hz, 2H), 3.93 (s, 3H), 1.24 (t,  $J =$

7.1 Hz, 3H);  $^{13}\text{C}$  NMR (126 MHz,  $\text{CDCl}_3$ )  $\delta$  166.28, 161.33, 141.64, 133.89-131.90 (m), 131.39, 129.69, 129.47, 128.58, 125.80 (t,  $J = 27.9$  Hz), 63.49, 52.47, 13.86;  $^{19}\text{F}$  NMR (470 MHz,  $\text{CDCl}_3$ )  $\delta$  -95.01. GC-MS (EI) Calcd. for  $\text{C}_{14}\text{H}_{13}\text{BrF}_2\text{O}_4$  362.00, found 362.01.

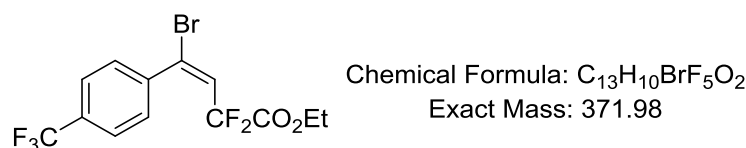

Compound **A12**<sup>1</sup>: purified by column chromatography on silica gel (petroleum ether/EtOAc = 20:1) to afford the **A12** (31.2 mg, 42%), yellow liquid.  $^1\text{H}$  NMR (500 MHz,  $\text{CDCl}_3$ )  $\delta$  7.63 (d,  $J = 8.1$  Hz, 2H), 7.49 (d,  $J = 8.0$  Hz, 2H), 6.55 (t,  $J = 11.7$  Hz, 1H), 4.11 (q,  $J = 7.1$  Hz, 2H), 1.25 (d,  $J = 7.2$  Hz, 3H);  $^{19}\text{F}$  NMR (470 MHz,  $\text{CDCl}_3$ )  $\delta$  -62.97 (d,  $J = 20.6$  Hz), -95.26. GC-MS (EI) Calcd. for  $\text{C}_{13}\text{H}_{10}\text{BrF}_5\text{O}_2$  371.98, [M-F] found 353.03.

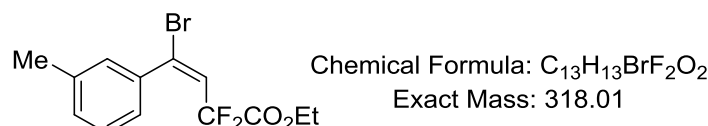

Compound **A13**<sup>1</sup>: purified by column chromatography on silica gel (petroleum ether/EtOAc = 20:1) to afford the **A13** (45.8 mg, 72%), yellow liquid.  $^1\text{H}$  NMR (500 MHz,  $\text{CDCl}_3$ )  $\delta$  7.26-7.21 (m, 1H), 7.16 (dt,  $J = 6.1, 3.8$  Hz, 3H), 6.47 (t,  $J = 11.0$  Hz, 1H), 3.96 (q,  $J = 7.2$  Hz, 2H), 2.34 (s, 3H), 1.18 (t,  $J = 7.2$  Hz, 3H);  $^{13}\text{C}$  NMR (126 MHz,  $\text{CDCl}_3$ )  $\delta$  163.68 (t,  $J = 32.8$  Hz), 138.04, 137.34 (d,  $J = 38.4$  Hz), 134.12 (d,  $J = 41.6$  Hz), 130.80 (d,  $J = 15.1$  Hz), 129.12, 128.10 (d,  $J = 13.3$  Hz), 125.63 (d,  $J = 23.2$  Hz), 124.97 (t,  $J = 28.8$  Hz), 111.22 (t,  $J = 248.9$  Hz), 63.25, 21.37, 13.76;  $^{19}\text{F}$  NMR (470 MHz,  $\text{CDCl}_3$ )  $\delta$  -93.48. GC-MS (EI) Calcd. for  $\text{C}_{13}\text{H}_{13}\text{BrF}_2\text{O}_2$  318.01, found 318.07.

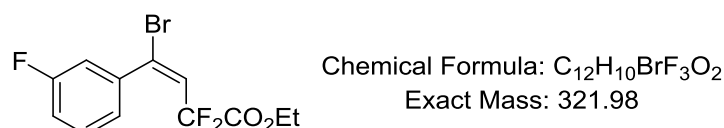

Compound **A14**: purified by column chromatography on silica gel (petroleum ether/EtOAc = 40:1) to afford the **A14** (43.8 mg, 68%), colorless liquid.  $^1\text{H}$  NMR (500 MHz,  $\text{CDCl}_3$ )  $\delta$  7.38 (td,  $J = 7.7, 5.6$  Hz, 1H), 7.23-7.17 (m, 1H), 7.13 (t,  $J = 8.5$  Hz, 2H), 6.56 (t,  $J = 11.5$  Hz, 1H), 4.14 (q,  $J = 7.1$  Hz, 2H), 1.30 (t,  $J = 7.1$  Hz, 3H);  $^{13}\text{C}$  NMR (126 MHz,  $\text{CDCl}_3$ )  $\delta$  161.56 (t,  $J = 35.4$  Hz), 159.74, 141.58, 132.57 (t,  $J = 27.9$  Hz), 128.72 (d,  $J = 8.5$  Hz), 122.46, 115.38 (d,  $J = 21.1$  Hz), 113.91 (d,  $J = 23.3$  Hz), 110.79 (d,  $J = 251.1$  Hz), 105.23, 62.30, 12.71;  $^{19}\text{F}$  NMR (470 MHz,  $\text{CDCl}_3$ )  $\delta$  -94.70, -112.15. GC-MS (EI) Calcd. for  $\text{C}_{12}\text{H}_{10}\text{BrF}_3\text{O}_2$  321.98, found 322.03.

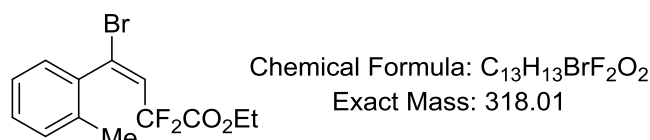

Compound **A15**: purified by column chromatography on silica gel (petroleum ether/EtOAc = 30:1) to afford the **A15** (35.6 mg, 56%), colorless liquid ( $E/Z = 92:8$ , the ratio detected by  $^{19}\text{F}$  NMR).  $^1\text{H}$  NMR



(500 MHz, CDCl<sub>3</sub>)  $\delta$  7.27-7.23 (m, 1H), 7.21-7.11 (m, 3H), 6.53 (td,  $J$  = 10.9, 2.5 Hz, 1H), 3.97 (qd,  $J$  = 7.2, 2.3 Hz, 2H), 2.33 (d,  $J$  = 2.5 Hz, 3H), 1.21 (td,  $J$  = 7.2, 2.5 Hz, 3H); <sup>13</sup>C NMR (126 MHz, CDCl<sub>3</sub>)  $\delta$  161.46 (t,  $J$  = 33.4 Hz), 135.38, 134.80, 131.93, 129.23, 128.90 (d,  $J$  = 10.8 Hz), 127.35, 125.19 (t,  $J$  = 28.5 Hz), 124.52, 109.93 (t,  $J$  = 249.8 Hz), 62.12, 18.26, 12.67; <sup>19</sup>F NMR (470 MHz, CDCl<sub>3</sub>)  $\delta$  -95.40 (d,  $J$  = 272.6 Hz), -97.44 (d,  $J$  = 272.6 Hz). GC-MS (EI) Calcd. for C<sub>13</sub>H<sub>13</sub>BrF<sub>2</sub>O<sub>2</sub> 318.01, found 318.06.

Z product: <sup>19</sup>F NMR (470 MHz, CDCl<sub>3</sub>)  $\delta$  -94.87 (d,  $J$  = 282.0 Hz), -97.12 (d,  $J$  = 282.0 Hz).

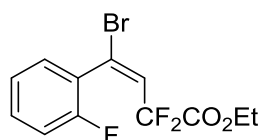

Chemical Formula: C<sub>12</sub>H<sub>10</sub>BrF<sub>3</sub>O<sub>2</sub>  
Exact Mass: 321.98

Compound **A16**: purified by column chromatography on silica gel (petroleum ether/EtOAc = 40:1) to afford the **A16** (33.5 mg, 52%), yellow liquid ( $E/Z$  = 96:4, the ratio detected by <sup>19</sup>F NMR). <sup>1</sup>H NMR (500 MHz, CDCl<sub>3</sub>)  $\delta$  7.36 (tdd,  $J$  = 7.6, 6.3, 1.8 Hz, 1H), 7.28 (td,  $J$  = 7.5, 1.8 Hz, 1H), 7.14 (td,  $J$  = 7.6, 1.1 Hz, 1H), 7.07 (ddd,  $J$  = 9.6, 8.3, 1.1 Hz, 1H), 6.61 (t,  $J$  = 11.5 Hz, 1H), 4.13 (q,  $J$  = 7.1 Hz, 2H), 1.27 (t,  $J$  = 7.1 Hz, 3H); <sup>13</sup>C NMR (126 MHz, CDCl<sub>3</sub>)  $\delta$  161.29 (t,  $J$  = 33.4 Hz), 157.35 (d,  $J$  = 251.2 Hz), 130.86 (d,  $J$  = 8.3 Hz), 129.24, 126.71 (t,  $J$  = 27.7 Hz), 124.73 (d,  $J$  = 9.5 Hz), 124.18 (d,  $J$  = 15.4 Hz), 122.90, 114.73 (d,  $J$  = 20.9 Hz), 109.84 (t,  $J$  = 250.5 Hz), 62.31, 12.68; <sup>19</sup>F NMR (470 MHz, CDCl<sub>3</sub>)  $\delta$  -98.50, -112.60. GC-MS (EI) Calcd. for C<sub>12</sub>H<sub>10</sub>BrF<sub>3</sub>O<sub>2</sub> 321.98, found 322.01.

Z product: <sup>19</sup>F NMR (470 MHz, CDCl<sub>3</sub>)  $\delta$  -99.02, -113.77.

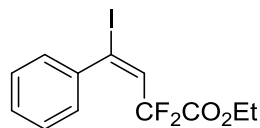

Chemical Formula: C<sub>12</sub>H<sub>11</sub>F<sub>2</sub>IO<sub>2</sub>  
Exact Mass: 351.98

Compound **A17**<sup>2</sup>: purified by column chromatography on silica gel (petroleum ether/EtOAc = 20:1) to afford the **A17** (59.8 mg, 85%), colorless liquid ( $E/Z$  = 94:6, the ratio detected by <sup>19</sup>F NMR). <sup>1</sup>H NMR (500 MHz, CDCl<sub>3</sub>)  $\delta$  7.31 (t,  $J$  = 2.6 Hz, 5H), 6.72 (t,  $J$  = 11.0 Hz, 1H), 3.97 (q,  $J$  = 7.1 Hz, 2H), 1.19 (t,  $J$  = 7.1 Hz, 3H); <sup>13</sup>C NMR (126 MHz, CDCl<sub>3</sub>)  $\delta$  162.67 (t,  $J$  = 33.4 Hz), 140.82, 133.15 (t,  $J$  = 28.3 Hz), 129.56, 128.17, 127.94, 110.99 (t,  $J$  = 252.0 Hz), 108.83, 63.26, 13.82; <sup>19</sup>F NMR (470 MHz, CDCl<sub>3</sub>)  $\delta$  -93.79. GC-MS (EI) Calcd. for C<sub>12</sub>H<sub>11</sub>F<sub>2</sub>IO<sub>2</sub> 351.98, found 352.03.

Z product: <sup>19</sup>F NMR (470 MHz, CDCl<sub>3</sub>)  $\delta$  -98.04.

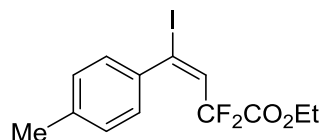

Chemical Formula: C<sub>13</sub>H<sub>13</sub>F<sub>2</sub>IO<sub>2</sub>  
Exact Mass: 365.99

Compound **A18**<sup>2</sup>: purified by column chromatography on silica gel (petroleum ether/EtOAc = 20:1) to afford the **A18** (66.6 mg, 91%), yellow liquid ( $E/Z$  = 94:6, the ratio detected by <sup>19</sup>F NMR). <sup>1</sup>H NMR (500 MHz, CDCl<sub>3</sub>)  $\delta$  7.21 (d,  $J$  = 8.1 Hz, 2H), 7.13 (d,  $J$  = 7.9 Hz, 2H), 6.70 (t,  $J$  = 10.9 Hz, 1H), 3.98 (d,  $J$  = 7.1 Hz, 2H), 2.35 (s, 3H), 1.20 (t,  $J$  = 7.2 Hz, 3H); <sup>13</sup>C NMR (126 MHz, CDCl<sub>3</sub>)  $\delta$  162.71 (t,  $J$  = 33.1 Hz), 139.80, 138.00, 132.84 (t,  $J$  = 28.4 Hz), 128.83, 127.97, 111.02 (t,  $J$  = 250.7 Hz), 109.40,

63.24, 21.49, 13.82;  $^{19}\text{F}$  NMR (470 MHz,  $\text{CDCl}_3$ )  $\delta$  -93.67. GC-MS (EI) Calcd. for  $\text{C}_{13}\text{H}_{13}\text{F}_2\text{IO}_2$  365.99, HRMS (EI $^+$ ) found 365.9931.

Z product:  $^{19}\text{F}$  NMR (470 MHz,  $\text{CDCl}_3$ )  $\delta$  -97.78.

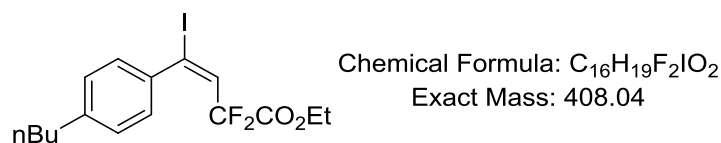

Compound **A19**: purified by column chromatography on silica gel (petroleum ether/EtOAc = 20:1) to afford the **A19** (71.8 mg, 88%), yellow liquid ( $E/Z$  = 97:3, the ratio detected by  $^{19}\text{F}$  NMR).  $^1\text{H}$  NMR (500 MHz,  $\text{CDCl}_3$ )  $\delta$  7.23 (d,  $J$  = 8.1 Hz, 2H), 7.13 (d,  $J$  = 8.2 Hz, 2H), 6.71 (t,  $J$  = 10.8 Hz, 1H), 3.95 (q,  $J$  = 7.1 Hz, 2H), 2.64-2.56 (m, 2H), 1.65-1.55 (m, 2H), 1.41-1.32 (m, 2H), 1.19 (t,  $J$  = 7.1 Hz, 3H), 0.94 (t,  $J$  = 7.4 Hz, 3H);  $^{13}\text{C}$  NMR (126 MHz,  $\text{CDCl}_3$ )  $\delta$  162.67 (t,  $J$  = 33.2 Hz), 144.79, 138.06, 132.82 (t,  $J$  = 28.6 Hz), 128.15, 128.04, 111.00 (t,  $J$  = 250.7 Hz), 109.53, 63.16, 35.55, 33.42, 22.46, 14.04, 13.80;  $^{19}\text{F}$  NMR (470 MHz,  $\text{CDCl}_3$ )  $\delta$  -93.25. GC-MS (EI) Calcd. for  $\text{C}_{16}\text{H}_{19}\text{F}_2\text{IO}_2$  408.04, found 408.17.

Z product:  $^{19}\text{F}$  NMR (470 MHz,  $\text{CDCl}_3$ )  $\delta$  -97.78.

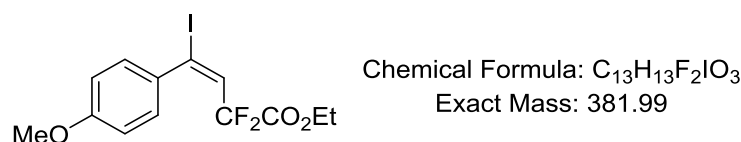

Compound **A20**<sup>2</sup>: purified by column chromatography on silica gel (petroleum ether/EtOAc = 20:1) to afford the **A20** (56.5 mg, 74%), brown liquid ( $E/Z$  = 93:7, the ratio detected by  $^{19}\text{F}$  NMR).  $^1\text{H}$  NMR (500 MHz,  $\text{CDCl}_3$ )  $\delta$  7.19 (d,  $J$  = 8.4 Hz, 2H), 6.77-6.71 (m, 2H), 6.60 (t,  $J$  = 10.8 Hz, 1H), 3.92 (q,  $J$  = 7.2 Hz, 2H), 3.74 (s, 3H), 1.13 (t,  $J$  = 7.1 Hz, 3H);  $^{13}\text{C}$  NMR (126 MHz,  $\text{CDCl}_3$ )  $\delta$  161.64 (t,  $J$  = 32.8 Hz), 159.29, 131.98, 131.49 (t,  $J$  = 28.6 Hz), 128.67, 112.33, 109.89 (t,  $J$  = 249.5 Hz), 108.30, 62.08, 54.32, 12.69;  $^{19}\text{F}$  NMR (470 MHz,  $\text{CDCl}_3$ )  $\delta$  -93.32. GC-MS (EI) Calcd. for  $\text{C}_{13}\text{H}_{13}\text{F}_2\text{IO}_3$  381.99, found 382.03.

Z product:  $^{19}\text{F}$  NMR (470 MHz,  $\text{CDCl}_3$ )  $\delta$  -97.59.

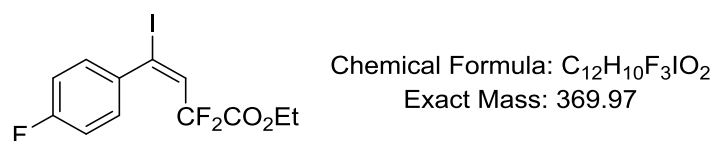

Compound **A21**<sup>2</sup>: purified by column chromatography on silica gel (petroleum ether/EtOAc = 40:1) to afford the **A21** (63.6 mg, 86%), colorless liquid.  $^1\text{H}$  NMR (500 MHz,  $\text{CDCl}_3$ )  $\delta$  7.34-7.27 (m, 2H), 7.00 (t,  $J$  = 8.6 Hz, 2H), 6.71 (t,  $J$  = 11.2 Hz, 1H), 4.05 (q,  $J$  = 7.1 Hz, 2H), 1.23 (t,  $J$  = 7.1 Hz, 3H);  $^{13}\text{C}$  NMR (126 MHz,  $\text{CDCl}_3$ )  $\delta$  163.00 (d,  $J$  = 126 Hz), 162.64 (t,  $J$  = 32.8 Hz), 136.97, 133.52 (t,  $J$  = 27.8 Hz), 130.04 (d,  $J$  = 8.7 Hz), 115.28 (d,  $J$  = 21.9 Hz), 111.96 (d,  $J$  = 250.9 Hz), 107.44, 63.39, 13.85;  $^{19}\text{F}$  NMR (470 MHz,  $\text{CDCl}_3$ )  $\delta$  -94.34, -110.60. GC-MS (EI) Calcd. for  $\text{C}_{12}\text{H}_{10}\text{F}_3\text{IO}_2$  369.97, found 370.01.

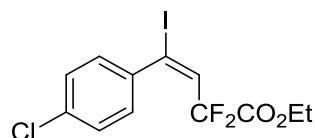

Chemical Formula: C<sub>12</sub>H<sub>10</sub>ClF<sub>2</sub>IO<sub>2</sub>  
Exact Mass: 385.94

Compound **A22**<sup>2</sup>: purified by column chromatography on silica gel (petroleum ether/EtOAc = 20:1) to afford the **A22** (65.6 mg, 85%), yellow liquid (*E/Z* = 96:4, the ratio detected by <sup>19</sup>F NMR). <sup>1</sup>H NMR (500 MHz, CDCl<sub>3</sub>) δ 7.31 (d, *J* = 8.4 Hz, 2H), 7.25 (d, *J* = 8.2 Hz, 2H), 6.72 (t, *J* = 11.3 Hz, 1H), 4.08 (q, *J* = 7.1 Hz, 2H), 1.25 (t, *J* = 7.2 Hz, 3H); <sup>13</sup>C NMR (126 MHz, CDCl<sub>3</sub>) δ 162.64 (t, *J* = 32.8 Hz), 139.36, 135.51, 133.55 (t, *J* = 27.9 Hz), 129.24, 128.42, 110.99 (t, *J* = 255.8 Hz), 107.06, 63.45, 13.86; <sup>19</sup>F NMR (470 MHz, CDCl<sub>3</sub>) δ -94.62. GC-MS (EI) Calcd. for C<sub>12</sub>H<sub>10</sub>ClF<sub>2</sub>IO<sub>2</sub> 385.94, found 385.96.  
Z product: <sup>19</sup>F NMR (470 MHz, CDCl<sub>3</sub>) δ -98.25.

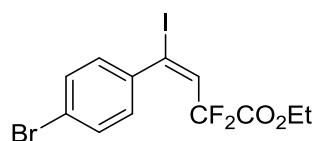

Chemical Formula: C<sub>12</sub>H<sub>10</sub>BrF<sub>2</sub>IO<sub>2</sub>  
Exact Mass: 429.89

Compound **A23**: purified by column chromatography on silica gel (petroleum ether/EtOAc = 20:1) to afford the **A23** (74.4 mg, 88%), yellow liquid (*E/Z* = 95:5, the ratio detected by <sup>19</sup>F NMR). <sup>1</sup>H NMR (500 MHz, CDCl<sub>3</sub>) δ 7.50-7.43 (m, 2H), 7.21-7.14 (m, 2H), 6.72 (t, *J* = 11.3 Hz, 1H), 4.08 (q, *J* = 7.2 Hz, 2H), 1.24 (t, *J* = 7.2 Hz, 3H); <sup>13</sup>C NMR (126 MHz, CDCl<sub>3</sub>) δ 162.62 (t, *J* = 32.8 Hz), 139.84, 133.53 (t, *J* = 27.7 Hz), 131.40, 129.44, 123.77, 110.98 (t, *J* = 251.3 Hz), 107.06, 63.47, 13.88; <sup>19</sup>F NMR (470 MHz, CDCl<sub>3</sub>) δ -93.72. GC-MS (EI) Calcd. for C<sub>12</sub>H<sub>10</sub>BrF<sub>2</sub>IO<sub>2</sub> 429.89, HRMS (EI<sup>+</sup>) found 429.8881.  
Z product: <sup>19</sup>F NMR (470 MHz, CDCl<sub>3</sub>) δ -97.61.

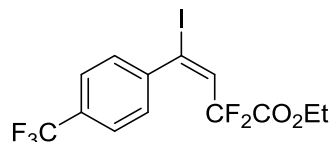

Chemical Formula: C<sub>13</sub>H<sub>10</sub>F<sub>5</sub>IO<sub>2</sub>  
Exact Mass: 419.96

Compound **A24**: purified by column chromatography on silica gel (petroleum ether/EtOAc = 25:1) to afford the **A24** (48.7, 58%), yellow liquid. <sup>1</sup>H NMR (500 MHz, CDCl<sub>3</sub>) δ 7.59 (d, *J* = 8.1 Hz, 2H), 7.41 (d, *J* = 8.0 Hz, 2H), 6.76 (t, *J* = 11.5 Hz, 1H), 4.10 (q, *J* = 7.1 Hz, 2H), 1.24 (t, *J* = 7.2 Hz, 3H); <sup>13</sup>C NMR (126 MHz, CDCl<sub>3</sub>) δ 162.59 (t, *J* = 33.5 Hz), 144.48, 133.91 (t, *J* = 26.8 Hz), 131.18, 128.16, 125.21, 109.99 (t, *J* = 251.7 Hz), 106.08, 63.53, 13.85. <sup>19</sup>F NMR (470 MHz, CDCl<sub>3</sub>) δ -62.92, -95.27. GC-MS (EI) Calcd. for C<sub>13</sub>H<sub>10</sub>F<sub>3</sub>IO<sub>2</sub> 419.96, HRMS (EI<sup>+</sup>) [M-F] found 400.9668.

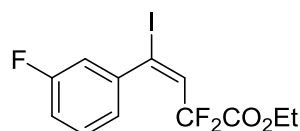

Chemical Formula: C<sub>12</sub>H<sub>10</sub>F<sub>3</sub>IO<sub>2</sub>  
Exact Mass: 369.97

Compound **A25**<sup>2</sup>: purified by column chromatography on silica gel (petroleum ether/EtOAc = 20:1) to afford the **A25** (54.8 mg, 74%), colorless liquid (*E/Z* = 94:6, the ratio detected by <sup>19</sup>F NMR). <sup>1</sup>H NMR (500 MHz, CDCl<sub>3</sub>) δ 7.30 (ddd, *J* = 13.4, 10.2, 5.7 Hz, 1H), 7.11-7.06 (m, 1H), 7.02 (ddd, *J* = 9.0, 5.2, 2.3 Hz, 2H), 6.73 (t, *J* = 11.2 Hz, 1H), 4.09 (q, *J* = 7.1 Hz, 2H), 1.25 (t, *J* = 7.1 Hz, 3H); <sup>13</sup>C NMR (126

MHz, CDCl<sub>3</sub>)  $\delta$  161.56 (t,  $J$  = 35.4 Hz), 159.74, 141.58, 132.57 (t,  $J$  = 27.9 Hz), 128.72 (d,  $J$  = 8.5 Hz), 122.46, 115.38 (d,  $J$  = 21.1 Hz), 113.91 (d,  $J$  = 23.3 Hz), 110.79 (d,  $J$  = 251.1 Hz), 105.23, 62.30, 12.71. <sup>19</sup>F NMR (470 MHz, CDCl<sub>3</sub>)  $\delta$  -94.76, -112.16. GC-MS (EI) Calcd. for C<sub>12</sub>H<sub>10</sub>F<sub>3</sub>IO<sub>2</sub> 369.97, found 369.78.

Z product: <sup>19</sup>F NMR (470 MHz, CDCl<sub>3</sub>)  $\delta$  -98.36, -112.20.

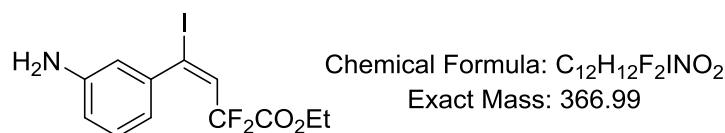

Compound **A26**: purified by column chromatography on silica gel (petroleum ether/EtOAc = 20:1) to afford the **A26** (37.4 mg, 51%), green liquid ( $E/Z$  = 96:4, the ratio detected by <sup>19</sup>F NMR). <sup>1</sup>H NMR (500 MHz, CDCl<sub>3</sub>)  $\delta$  7.08 (t,  $J$  = 7.8 Hz, 1H), 6.71-6.65 (m, 2H), 6.62- 6.54 (m, 2H), 3.96 (q,  $J$  = 7.2 Hz, 2H), 3.31 (s, 2H), 1.20 (t,  $J$  = 7.1 Hz, 3H); <sup>13</sup>C NMR (126 MHz, CDCl<sub>3</sub>)  $\delta$  161.66 (t,  $J$  = 17.0 Hz), 144.82, 140.37, 131.73 (t,  $J$  = 29.1 Hz), 128.00, 115.11 (t,  $J$  = 255.8 Hz), 109.84, 108.06, 62.10, 12.67; <sup>19</sup>F NMR (470 MHz, CDCl<sub>3</sub>)  $\delta$  -93.08. GC-MS (EI) Calcd. for C<sub>12</sub>H<sub>12</sub>F<sub>2</sub>INO<sub>2</sub> 366.99, HRMS (EI<sup>+</sup>) found 366.9882.

Z Product: <sup>19</sup>F NMR (470 MHz, CDCl<sub>3</sub>)  $\delta$ , -97.91.

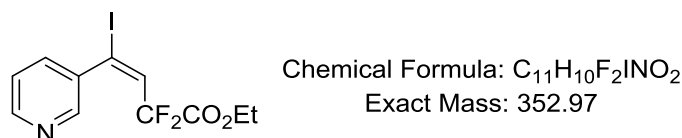

Compound **A27**: purified by column chromatography on silica gel (petroleum ether/EtOAc = 20:1) to afford the **A27** (40.9, 58%), yellow liquid. <sup>1</sup>H NMR (500 MHz, CDCl<sub>3</sub>)  $\delta$  8.37-8.17 (m, 2H), 7.33 (dt,  $J$  = 8.0, 1.9 Hz, 1H), 7.04-6.91 (m, 1H), 6.53 (t,  $J$  = 11.6 Hz, 1H), 3.85 (d,  $J$  = 7.2 Hz, 2H), 0.98 (t,  $J$  = 7.2 Hz, 3H); <sup>13</sup>C NMR (126 MHz, CDCl<sub>3</sub>)  $\delta$  161.54 (t,  $J$  = 32.8 Hz), 149.07, 146.91, 136.09, 134.07, 133.44 (t,  $J$  = 27.2 Hz), 121.73, 109.86 (t,  $J$  = 252.6 Hz), 102.78, 62.49, 12.76; <sup>19</sup>F NMR (470 MHz, CDCl<sub>3</sub>)  $\delta$  -95.44. GC-MS (EI) Calcd. for C<sub>11</sub>H<sub>10</sub>F<sub>2</sub>INO<sub>2</sub> 352.97, HRMS (EI<sup>+</sup>) found 352.9722.

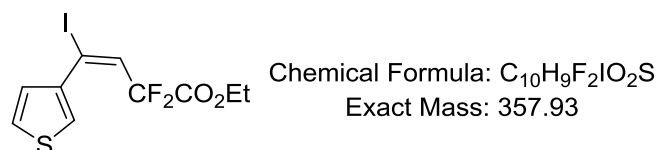

Compound **A28**: purified by column chromatography on silica gel (petroleum ether/EtOAc = 20:1) to afford the **A28** (33.7mg, 47%), yellow liquid ( $E/Z$  = 94:6, the ratio detected by <sup>19</sup>F NMR). <sup>1</sup>H NMR (500 MHz, CDCl<sub>3</sub>)  $\delta$  7.40 (dd,  $J$  = 3.0, 1.3 Hz, 1H), 7.28 (dd,  $J$  = 5.1, 3.0 Hz, 1H), 7.09 (dd,  $J$  = 5.0, 1.4 Hz, 1H), 6.68 (s, 1H), 4.01 (d,  $J$  = 7.2 Hz, 2H), 1.19 (s, 3H); <sup>13</sup>C NMR (126 MHz, CDCl<sub>3</sub>)  $\delta$  161.42 (t,  $J$  = 33.7 Hz), 139.07, 132.26 (t,  $J$  = 29.0 Hz), 127.44, 124.92, 124.71, 110.01 (t,  $J$  = 249.2 Hz), 101.16, 62.21, 12.73; <sup>19</sup>F NMR (470 MHz, CDCl<sub>3</sub>)  $\delta$  -92.47. GC-MS (EI) Calcd. for C<sub>10</sub>H<sub>9</sub>F<sub>2</sub>IO<sub>2</sub>S 357.93, HRMS (EI<sup>+</sup>) found 357.9342.

Z Product: <sup>19</sup>F NMR (470 MHz, CDCl<sub>3</sub>)  $\delta$ , -97.20.

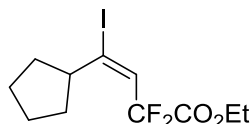

Chemical Formula:  $C_{11}H_{15}F_2IO_2$

Exact Mass: 344.01

Compound **A29**: purified by column chromatography on silica gel (petroleum ether/EtOAc = 20:1) to afford the **A29** (29.6 mg, 43%), colorless liquid.  $^1H$  NMR (500 MHz,  $CDCl_3$ )  $\delta$  6.41 (t,  $J$  = 13.0 Hz, 1H), 4.33 (q,  $J$  = 7.2 Hz, 2H), 2.56 (p,  $J$  = 8.1 Hz, 1H), 1.79-1.68 (m, 4H), 1.67-1.61 (m, 2H), 1.46-1.40 (m, 2H), 1.35 (t,  $J$  = 7.1 Hz, 3H);  $^{13}C$  NMR (126 MHz,  $CDCl_3$ )  $\delta$  163.50 (t,  $J$  = 34.0 Hz), 131.24 (t,  $J$  = 27.8 Hz), 111.81 (t,  $J$  = 240.7 Hz), 107.56, 63.45, 46.09, 34.96, 25.83, 14.02;  $^{19}F$  NMR (470 MHz,  $CDCl_3$ )  $\delta$  -96.78. GC-MS (EI) Calcd. for  $C_{11}H_{15}F_2IO_2$  344.01, found 344.05.

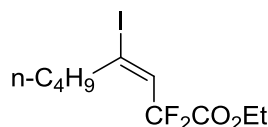

Chemical Formula:  $C_{10}H_{15}F_2IO_2$

Exact Mass: 332.01

Compound **A30**<sup>3</sup>: purified by column chromatography on silica gel (petroleum ether/EtOAc = 20:1) to afford the **A30** (15.9 mg, 24%), colorless liquid.  $^1H$  NMR (500 MHz,  $CDCl_3$ )  $\delta$  6.40 (t,  $J$  = 13.2 Hz, 1H), 4.33 (q,  $J$  = 7.1 Hz, 2H), 2.60 (t,  $J$  = 7.6 Hz, 2H), 1.54-1.46 (m, 2H), 1.35 (td,  $J$  = 7.4, 2.9 Hz, 6H), 0.93 (t,  $J$  = 7.3 Hz, 3H).  $^{19}F$  NMR (470 MHz,  $CDCl_3$ )  $\delta$  -97.73. GC-MS (EI) Calcd. for  $C_{10}H_{15}F_2IO_2$  332.01, found 332.05.

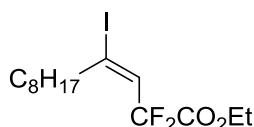

Chemical Formula:  $C_{14}H_{23}F_2IO_2$

Exact Mass: 388.07

Compound **A31**: purified by column chromatography on silica gel (petroleum ether/EtOAc = 20:1) to afford the **A31** (31.8 mg, 41%), colorless liquid.  $^1H$  NMR (500 MHz,  $CDCl_3$ )  $\delta$  6.40 (t,  $J$  = 13.2 Hz, 1H), 4.33 (q,  $J$  = 7.2 Hz, 2H), 2.66-2.54 (m, 2H), 1.57-1.49 (m, 2H), 1.36 (t,  $J$  = 7.1 Hz, 3H), 1.33-1.24 (m, 11H), 0.88 (t,  $J$  = 6.7 Hz, 3H);  $^{13}C$  NMR (126 MHz,  $CDCl_3$ )  $\delta$  162.37 (t,  $J$  = 55.4 Hz), 131.31 (t,  $J$  = 27.7 Hz), 111.69 (t,  $J$  = 254.0 Hz), 63.46, 40.89, 31.92, 30.04, 29.42, 29.24, 28.51, 22.76, 14.20, 14.03;  $^{19}F$  NMR (470 MHz,  $CDCl_3$ )  $\delta$  -97.68. GC-MS (EI) Calcd. for  $C_{14}H_{23}F_2IO_2$  388.07, HRMS (EI<sup>+</sup>) found 388.0720.

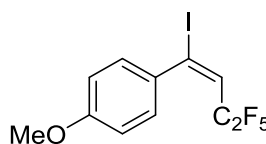

Chemical Formula:  $C_{11}H_8F_5IO$

Exact Mass: 377.95

Compound **A32**: purified by column chromatography on silica gel (petroleum ether/EtOAc = 40:1) to afford the **A32** (59.7 mg, 79%), yellow liquid.  $^1H$  NMR (500 MHz,  $CDCl_3$ )  $\delta$  7.27 (d,  $J$  = 8.4 Hz, 2H), 6.84 (d,  $J$  = 8.7 Hz, 2H), 6.51 (t,  $J$  = 13.3 Hz, 1H), 3.81 (s, 3H);  $^{13}C$  NMR (126 MHz,  $CDCl_3$ )  $\delta$  159.24, 132.50, 127.82, 125.23 (t,  $J$  = 21.9 Hz), 112.55, 112.32, 54.28;  $^{19}F$  NMR (470 MHz,  $CDCl_3$ )  $\delta$  -84.95--85.85 (m), -108.45--109.61 (m). GC-MS (EI) Calcd. for  $C_{11}H_8F_5IO$  377.95, HRMS (EI<sup>+</sup>) found 377.9545.

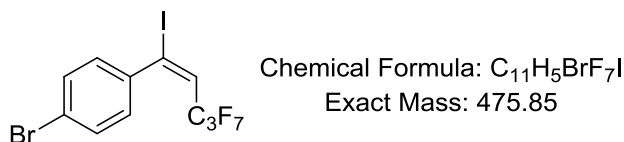

Compound **A33**: purified by column chromatography on silica gel (petroleum ether) to afford the **A33** (50.4 mg, 53%), yellow liquid.  $^1H$  NMR (500 MHz,  $CDCl_3$ )  $\delta$  7.48 (d,  $J$  = 8.2 Hz, 2H), 7.16 (d,  $J$  = 8.2 Hz, 2H), 6.65-6.55 (m, 1H);  $^{13}C$  NMR (126 MHz,  $CDCl_3$ )  $\delta$  139.12, 130.28, 127.40, 126.43 (t,  $J$  = 22.1 Hz), 122.57, 109.89;  $^{19}F$  NMR (470 MHz,  $CDCl_3$ )  $\delta$  -80.22 (t,  $J$  = 2.52 Hz), -106.12 (d,  $J$  = 9.4 Hz), -127.14. GC-MS (EI) Calcd. for  $C_{11}H_5BrF_7I$  475.85, HRMS (EI<sup>+</sup>) found 475.8510.

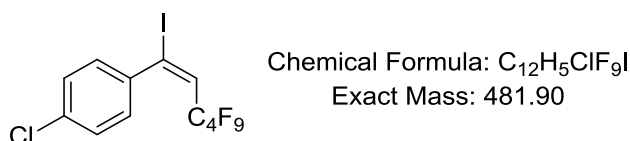

Compound **A34**: purified by column chromatography on silica gel (petroleum ether) to afford the **A34** (70.4 mg, 73%), yellow liquid ( $E/Z$  = 81:19, the ratio detected by  $^1H$  NMR).  $^1H$  NMR (500 MHz,  $CDCl_3$ )  $\delta$  7.33 (d,  $J$  = 8.6 Hz, 2H), 7.24 (d,  $J$  = 8.5 Hz, 2H), 6.61 (t,  $J$  = 13.4 Hz, 1H);  $^{13}C$  NMR (126 MHz,  $CDCl_3$ )  $\delta$  139.80, 135.48, 129.47 (d,  $J$  = 26.1 Hz), 128.90 (d,  $J$  = 13.4 Hz), 128.47, 128.35, 127.72 (t,  $J$  = 22.3 Hz), 124.52 (t,  $J$  = 23.3 Hz), 111.05;  $^{19}F$  NMR (470 MHz,  $CDCl_3$ )  $\delta$  -81.02 (t,  $J$  = 9.7 Hz), -105.42 (t,  $J$  = 12.3 Hz), -123.57 – -123.96 (m), -125.83 (td,  $J$  = 12.3, 4.8 Hz). GC-MS (EI) Calcd. for  $C_{12}H_5ClF_9I$  481.90, found 481.90.

Z product:  $^1H$  NMR (500 MHz,  $CDCl_3$ )  $\delta$  7.45-7.39 (m, 2H), 7.38-7.34 (m, 2H), 6.51 (t,  $J$  = 13.1 Hz, 1H).

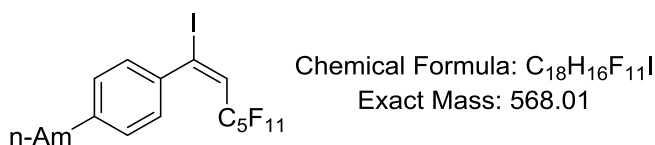

Compound **A35**: purified by column chromatography on silica gel (petroleum ether) to afford the **A35** (73.8 mg, 65%), yellow liquid.  $^1H$  NMR (500 MHz,  $CDCl_3$ )  $\delta$  7.21 (d,  $J$  = 7.8 Hz, 2H), 7.13 (d,  $J$  = 7.9 Hz, 2H), 6.57 (t,  $J$  = 13.5 Hz, 1H), 2.64-2.55 (m, 2H), 1.62 (p,  $J$  = 7.3 Hz, 2H), 1.33 (dh,  $J$  = 7.0, 3.9, 3.1 Hz, 4H), 0.90 (t,  $J$  = 6.8 Hz, 3H);  $^{13}C$  NMR (126 MHz,  $CDCl_3$ )  $\delta$  144.64, 138.67, 128.06, 127.03, 126.72 (t,  $J$  = 18.9 Hz), 35.86, 31.64, 30.91, 22.63, 14.11;  $^{19}F$  NMR (470 MHz,  $CDCl_3$ )  $\delta$  -80.79 (t,  $J$  = 9.8 Hz), -105.07 (t,  $J$  = 13.0 Hz), -121.86--122.83 (m), -122.89--123.57 (m), -125.70--126.67 (m). GC-MS (EI) Calcd. for  $C_{18}H_{16}F_{11}I$  568.01, found 568.02.

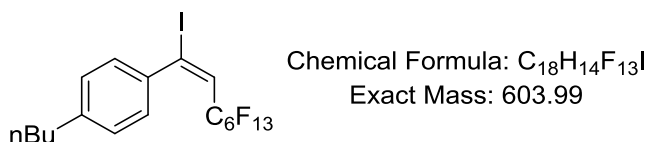

Compound **A36**: purified by column chromatography on silica gel (petroleum ether) to afford the **A36** (73.7 mg, 61%), yellow liquid.  $^1H$  NMR (500 MHz,  $CDCl_3$ )  $\delta$  7.24 (d,  $J$  = 8.2 Hz, 2H), 7.15 (d,  $J$  = 8.2 Hz, 2H), 6.59 (t,  $J$  = 13.5 Hz, 1H), 2.66-2.59 (m, 2H), 1.67-1.58 (m, 2H), 1.39 (dt,  $J$  = 15.0, 7.4 Hz, 2H), 0.95 (t,  $J$  = 7.4 Hz, 3H);  $^{13}C$  NMR (126 MHz,  $CDCl_3$ )  $\delta$  144.59, 138.72, 128.49 (d,  $J$  = 35.1 Hz),

128.05, 127.03, 126.79 (d,  $J = 22.5$  Hz), 113.59, 35.56, 33.34, 22.48, 13.95;  $^{19}\text{F}$  NMR (470 MHz,  $\text{CDCl}_3$ )  $\delta$  -80.79 (d,  $J = 8.3$  Hz), -104.99 (t,  $J = 13.1$  Hz), -121.67 (p,  $J = 13.6$  Hz), -122.31 – -123.85 (m), -126.12 (td,  $J = 14.0, 6.3$  Hz). GC-MS (EI) Calcd. for  $\text{C}_{18}\text{H}_{14}\text{F}_{13}\text{I}$  603.99, HRMS (EI $^+$ ) found 603.9938.

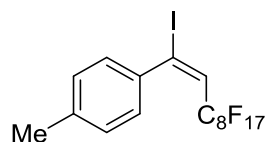

Chemical Formula:  $\text{C}_{17}\text{H}_8\text{F}_{17}\text{I}$   
Exact Mass: 661.94

Compound **A37**: purified by column chromatography on silica gel (petroleum ether) to afford the **A37** (54.3 mg, 41%), yellow liquid.  $^1\text{H}$  NMR (500 MHz,  $\text{CDCl}_3$ )  $\delta$  7.20 (d,  $J = 7.9$  Hz, 1H), 7.13 (d,  $J = 7.9$  Hz, 1H), 6.57 (t,  $J = 13.5$  Hz, 0H), 2.35 (s, 1H);  $^{13}\text{C}$  NMR (126 MHz,  $\text{CDCl}_3$ )  $\delta$  139.61, 138.63, 128.79 (t,  $J = 60.5$  Hz), 128.76, 126.99, 126.77 (t,  $J = 35.3$  Hz), 113.41, 21.42;  $^{19}\text{F}$  NMR (470 MHz,  $\text{CDCl}_3$ )  $\delta$  -80.85 (t,  $J = 9.8$  Hz), -105.06 (t,  $J = 13.1$  Hz), -121.51 (q,  $J = 14.0, 13.0$  Hz), -121.74--122.13 (m), -122.57--123.03 (m), -125.89--126.55 (m). GC-MS (EI) Calcd. for  $\text{C}_{17}\text{H}_8\text{F}_{17}\text{I}$  661.94, found 661.74.

Z product:  $^1\text{H}$  NMR (500 MHz,  $\text{CDCl}_3$ )  $\delta$  7.38 (d,  $J = 7.9$  Hz, 1H), 7.16 (s, 0H), 6.49 (t,  $J = 13.3$  Hz, 0H), 2.38 (s, 2H).

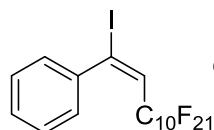

Chemical Formula:  $\text{C}_{18}\text{H}_6\text{F}_{21}\text{I}$   
Exact Mass: 747.92

Compound **A38**: purified by column chromatography on silica gel (petroleum ether) to afford the **A38** (55.4 mg, 37%), white solid.  $^1\text{H}$  NMR (500 MHz,  $\text{CDCl}_3$ )  $\delta$  7.35-7.27 (m, 5H), 6.59 (t,  $J = 13.5$  Hz, 1H);  $^{13}\text{C}$  NMR (126 MHz,  $\text{CDCl}_3$ )  $\delta$  141.47, 139.77, 134.71-130.89 (m), 130.21, 129.31, 129.00, 128.64 (d,  $J = 13.4$  Hz), 128.04, 127.68, 127.25 (d,  $J = 22.7$  Hz), 126.97-126.78 (m), 118.63-118.11 (m), 115.23-115.00 (m), 113.08-12.46 (m), 111.14-110.36 (m), 109.60-107.58 (m);  $^{19}\text{F}$  NMR (470 MHz,  $\text{CDCl}_3$ )  $\delta$  -80.74 (t,  $J = 10.0$  Hz), -105.17 (t,  $J = 12.8$  Hz), -121.46, -121.56--122.01 (m), -122.57--122.92 (m), -126.08 (td,  $J = 14.5, 6.8$  Hz). GC-MS (EI) Calcd. for  $\text{C}_{18}\text{H}_6\text{F}_{21}\text{I}$  747.92, found 746.96.

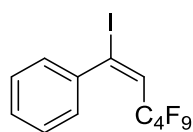

Chemical Formula:  $\text{C}_{12}\text{H}_6\text{F}_9\text{I}$   
Exact Mass: 447.94

Compound **A39**<sup>4</sup>: purified by column chromatography on silica gel (petroleum ether) to afford the **A-39** (48.4 mg, 54%), colorless liquid.  $^1\text{H}$  NMR (500 MHz,  $\text{CDCl}_3$ )  $\delta$  7.37-7.27 (m, 5H), 6.60 (t,  $J = 13.5$  Hz, 1H);  $^{13}\text{C}$  NMR (126 MHz,  $\text{CDCl}_3$ )  $\delta$  141.41, 129.39, 128.65, 128.11, 126.94, 112.89;  $^{19}\text{F}$  NMR (470 MHz,  $\text{CDCl}_3$ )  $\delta$  -81.03 (t,  $J = 9.7$  Hz), -105.41 (t,  $J = 13.1$  Hz), -123.78 (d,  $J = 9.3$  Hz), -124.92--127.97 (m). GC-MS (EI) Calcd. for  $\text{C}_{12}\text{H}_6\text{F}_9\text{I}$  447.94, found 448.12.

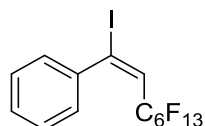

Chemical Formula:  $\text{C}_{14}\text{H}_6\text{F}_{13}\text{I}$   
Exact Mass: 547.93

Compound **A40**<sup>5</sup>: purified by column chromatography on silica gel (petroleum ether) to afford the **A40** (44.9 mg, 41%), colorless liquid. <sup>1</sup>H NMR (500 MHz, CDCl<sub>3</sub>) δ 7.28-7.20 (m, 5H), 6.52 (t, *J* = 13.5 Hz, 1H); <sup>13</sup>C NMR (126 MHz, CDCl<sub>3</sub>) δ 141.43, 130.30, 129.38, 128.48 (d, *J* = 40.1 Hz), 128.10, 127.19 (d, *J* = 22.0 Hz), 126.93; <sup>19</sup>F NMR (470 MHz, CDCl<sub>3</sub>) δ -80.82 (d, *J* = 8.1 Hz), -105.19 (t, *J* = 13.1 Hz), -121.71 (t, *J* = 14.6 Hz), -122.84 (d, *J* = 9.0 Hz), -126.15 (ddd, *J* = 19.7, 14.2, 5.9 Hz). GC-MS (EI) Calcd. for C<sub>14</sub>H<sub>6</sub>F<sub>13</sub>I 547.93, found 548.07.

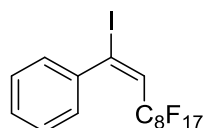

Chemical Formula: C<sub>16</sub>H<sub>6</sub>F<sub>17</sub>I  
Exact Mass: 647.92

Compound **A41**<sup>6</sup>: purified by column chromatography on silica gel (petroleum ether) to afford the **A41** (51.8 mg, 40%), colorless liquid. <sup>1</sup>H NMR (500 MHz, CDCl<sub>3</sub>) δ 7.36-7.27 (m, 5H), 6.60 (t, *J* = 13.5 Hz, 1H); <sup>13</sup>C NMR (126 MHz, CDCl<sub>3</sub>) δ 141.43, 129.38, 128.10, 127.12, 126.93, 112.79; <sup>19</sup>F NMR (470 MHz, CDCl<sub>3</sub>) δ -80.79 (t, *J* = 10.0 Hz), -105.19 (t, *J* = 13.0 Hz), -120.95--121.64 (m), -121.64--122.18 (m), -122.77 (dddd, *J* = 30.8, 24.1, 15.3, 8.6 Hz), -126.12 (td, *J* = 13.6, 13.0, 7.1 Hz). GC-MS (EI) Calcd. for C<sub>16</sub>H<sub>6</sub>F<sub>17</sub>I 647.92, found 647.92.

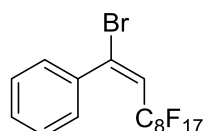

Chemical Formula: C<sub>16</sub>H<sub>6</sub>BrF<sub>17</sub>  
Exact Mass: 599.94

Compound **A42**: purified by column chromatography on silica gel (petroleum ether) to afford the **A42** (34.8 mg, 29%), colorless liquid. <sup>1</sup>H NMR (500 MHz, CDCl<sub>3</sub>) δ 7.37 (dd, *J* = 7.0, 3.6 Hz, 5H), 6.39 (t, *J* = 13.5 Hz, 1H); <sup>13</sup>C NMR (126 MHz, CDCl<sub>3</sub>) δ 137.56 (d, *J* = 32.0 Hz), 129.94, 128.19, 127.87, 126.94, 119.42 (t, *J* = 22.4 Hz); <sup>19</sup>F NMR (470 MHz, CDCl<sub>3</sub>) δ -80.80 (t, *J* = 10.2 Hz), -105.21 (t, *J* = 13.2 Hz), -121.47 (q, *J* = 13.6 Hz), -121.90 (tt, *J* = 23.7, 13.1 Hz), -122.78 (ddd, *J* = 59.7, 21.3, 11.7 Hz), -125.98--126.27 (m). GC-MS (EI) Calcd. for C<sub>16</sub>H<sub>6</sub>BrF<sub>17</sub> 599.94, found 600.06.

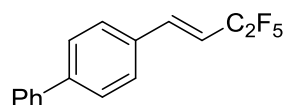

Chemical Formula: C<sub>16</sub>H<sub>11</sub>F<sub>5</sub>  
Exact Mass: 298.08

Compound **B1**: purified by column chromatography on silica gel (petroleum ether) to afford the **B1** (23.2 mg, 39%), yellow liquid. <sup>1</sup>H NMR (500 MHz, CDCl<sub>3</sub>) δ 7.66-7.58 (m, 4H), 7.58-7.51 (m, 2H), 7.46 (t, *J* = 7.6 Hz, 2H), 7.38 (dd, *J* = 8.4, 6.4 Hz, 1H), 7.20 (d, *J* = 16.7 Hz, 1H), 6.21 (dt, *J* = 16.1, 11.8 Hz, 1H); <sup>13</sup>C NMR (126 MHz, CDCl<sub>3</sub>) δ 143.10, 140.19, 139.32, 132.55, 129.05, 128.23, 128.01, 127.72, 127.19, 114.02 (t, *J* = 22.9 Hz); <sup>19</sup>F NMR (470 MHz, CDCl<sub>3</sub>) δ -85.00, -114.77 (d, *J* = 2.6 Hz). GC-MS (EI) Calcd. for C<sub>16</sub>H<sub>11</sub>F<sub>5</sub> 298.08, HRMS (EI<sup>+</sup>) found 298.0785.

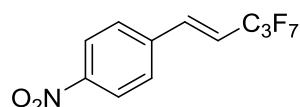

Chemical Formula: C<sub>11</sub>H<sub>6</sub>F<sub>7</sub>NO<sub>2</sub>  
Exact Mass: 317.03

Compound **B2**: purified by column chromatography on silica gel (petroleum ether) to afford the **B2** (19.7 mg, 31%), colorless liquid. <sup>1</sup>H NMR (500 MHz, CDCl<sub>3</sub>) δ 8.28 (d, *J* = 8.7 Hz, 2H), 7.65 (d, *J* =



8.7 Hz, 2H), 7.26 (d,  $J = 16.2$  Hz, 1H), 6.36 (dt,  $J = 16.2, 11.8$  Hz, 1H);  $^{13}\text{C}$  NMR (126 MHz,  $\text{CDCl}_3$ )  $\delta$  148.74, 139.53, 137.61, 128.54, 124.39, 118.67 (t,  $J = 23.2$  Hz);  $^{19}\text{F}$  NMR (470 MHz,  $\text{CDCl}_3$ )  $\delta$  -80.23 (t,  $J = 9.1$  Hz), -112.83 (q,  $J = 9.3$  Hz), -127.33. GC-MS (EI) Calcd. for  $\text{C}_{11}\text{H}_6\text{F}_7\text{NO}_2$  317.03, HRMS ( $\text{EI}^+$ ) found 317.0284.

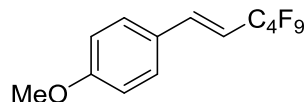

Chemical Formula:  $\text{C}_{13}\text{H}_9\text{F}_9\text{O}$   
Exact Mass: 352.05

Compound **B3**<sup>7</sup>: purified by column chromatography on silica gel (petroleum ether) to afford the **B3** (31.7 mg, 45%), yellow liquid.  $^1\text{H}$  NMR (500 MHz,  $\text{CDCl}_3$ )  $\delta$  7.42 (d,  $J = 8.7$  Hz, 2H), 7.11 (d,  $J = 16.1$  Hz, 1H), 6.92 (d,  $J = 8.7$  Hz, 2H), 6.05 (dt,  $J = 16.2, 12.3$  Hz, 1H), 3.85 (s, 3H);  $^{13}\text{C}$  NMR (126 MHz,  $\text{CDCl}_3$ )  $\delta$  161.31, 139.27, 129.30, 126.36, 114.46, 111.73 (t,  $J = 22.7$  Hz);  $^{19}\text{F}$  NMR (470 MHz,  $\text{CDCl}_3$ )  $\delta$  -81.01 (dd,  $J = 11.4, 8.0$  Hz), -110.79 (t,  $J = 12.1$  Hz), -122.26--125.30 (m), -125.30--126.98 (m). GC-MS (EI) Calcd. for  $\text{C}_{13}\text{H}_9\text{F}_9\text{O}$  352.05, found 352.05.

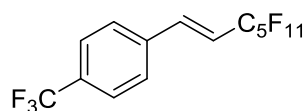

Chemical Formula:  $\text{C}_{14}\text{H}_6\text{F}_{14}$   
Exact Mass: 440.02

Compound **B4**: purified by column chromatography on silica gel (petroleum ether) to afford the **B4** (25.5 mg, 29%), yellow liquid.  $^1\text{H}$  NMR (500 MHz,  $\text{CDCl}_3$ )  $\delta$  7.67 (d,  $J = 8.2$  Hz, 2H), 7.60 (d,  $J = 8.1$  Hz, 2H), 7.22 (d,  $J = 16.2$  Hz, 1H), 6.30 (dt,  $J = 16.2, 11.9$  Hz, 1H);  $^{13}\text{C}$  NMR (126 MHz,  $\text{CDCl}_3$ )  $\delta$  138.43, 136.93, 132.19 (t,  $J = 32.8$  Hz), 128.02, 126.11, 123.85 (q,  $J = 272.7$  Hz), 117.12 (t,  $J = 23.7$  Hz);  $^{19}\text{F}$  NMR (470 MHz,  $\text{CDCl}_3$ )  $\delta$  -62.91, -80.48--81.18 (m), -111.58 (t,  $J = 12.6$  Hz), -122.35 (dtt,  $J = 15.8, 6.0, 3.1$  Hz), -122.94--123.73 (m), -126.22 (dtd,  $J = 14.3, 6.9, 3.4$  Hz). GC-MS (EI) Calcd. for  $\text{C}_{14}\text{H}_6\text{F}_{14}$  440.02, HRMS ( $\text{EI}^+$ ) found 440.0253.

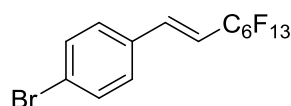

Chemical Formula:  $\text{C}_{14}\text{H}_6\text{BrF}_{13}$   
Exact Mass: 499.94

Compound **B5**<sup>7</sup>: purified by column chromatography on silica gel (petroleum ether) to afford the **B5** (46.0 mg, 46%), yellow liquid.  $^1\text{H}$  NMR (500 MHz,  $\text{CDCl}_3$ )  $\delta$  7.54 (d,  $J = 8.3$  Hz, 2H), 7.35 (d,  $J = 8.2$  Hz, 2H), 7.12 (d,  $J = 16.0$  Hz, 1H), 6.20 (dt,  $J = 16.3, 12.0$  Hz, 1H);  $^{13}\text{C}$  NMR (126 MHz,  $\text{CDCl}_3$ )  $\delta$  138.68, 132.53, 132.34, 129.19, 124.61, 115.19 (t,  $J = 22.7$  Hz);  $^{19}\text{F}$  NMR (470 MHz,  $\text{CDCl}_3$ )  $\delta$  -80.75 (t,  $J = 10.2$  Hz), -111.24 (dd,  $J = 15.6, 10.8$  Hz), -120.67--122.40 (m), -122.60--122.97 (m), -123.15 (td,  $J = 14.8, 6.8$  Hz), -126.12 (td,  $J = 14.6, 6.9$  Hz). GC-MS (EI) Calcd. for  $\text{C}_{14}\text{H}_6\text{BrF}_{13}$  499.94, found 499.95.

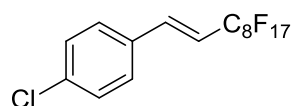

Chemical Formula:  $\text{C}_{16}\text{H}_6\text{ClF}_{17}$   
Exact Mass: 555.99

Compound **B6**: purified by column chromatography on silica gel (petroleum ether) to afford the **B6** (42.2 mg, 38%), yellow liquid ( $E/Z = 86:14$ , the ratio detected by  $^1\text{H}$  NMR).  $^1\text{H}$  NMR (500 MHz,  $\text{CDCl}_3$ )  $\delta$  7.40 (q,  $J = 8.7$  Hz, 4H), 7.13 (d,  $J = 16.1$  Hz, 1H), 6.18 (dt,  $J = 16.2, 12.0$  Hz, 1H);  $^{13}\text{C}$  NMR (126 MHz,  $\text{CDCl}_3$ )  $\delta$  138.57, 136.32, 132.11, 129.36, 128.95, 115.09 (t,  $J = 23.9$  Hz);  $^{19}\text{F}$  NMR

(470 MHz, CDCl<sub>3</sub>)  $\delta$  -80.56 (t,  $J$  = 10.0 Hz), -111.03 (t,  $J$  = 12.8 Hz), -121.21 (q,  $J$  = 13.1, 11.9 Hz), -121.72 (tt,  $J$  = 21.5, 12.3 Hz), -122.53 (tq,  $J$  = 18.8, 8.9, 8.3 Hz), -122.86--123.10 (m), -125.93 (td,  $J$  = 14.1, 13.6, 6.3 Hz). GC-MS (EI) Calcd. for C<sub>14</sub>H<sub>6</sub>BrF<sub>13</sub> 555.99, HRMS (EI<sup>+</sup>) found 555.9883.

Z Product: <sup>1</sup>H NMR (500 MHz, CDCl<sub>3</sub>)  $\delta$  7.35-7.28 (m, 4H), 7.07 (d,  $J$  = 12.8 Hz, 1H), 5.77 (q,  $J$  = 15.2 Hz, 1H).

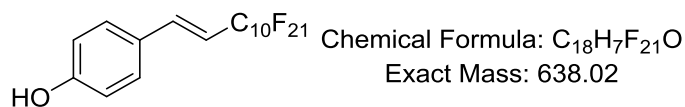

Compound **B7**: purified by column chromatography on silica gel (petroleum ether) to afford the **B7** (24.2 mg, 19%), yellow solid. <sup>1</sup>H NMR (500 MHz, MeOD)  $\delta$  7.42-7.31 (m, 2H), 7.07 (dd,  $J$  = 16.0, 8.9 Hz, 1H), 6.81-6.73 (m, 2H), 6.52 (s, 1H), 6.19-6.03 (m, 1H); <sup>13</sup>C NMR (126 MHz, MeOD)  $\delta$  158.46, 138.75, 128.10, 123.88, 114.34, 108.70 (t,  $J$  = 36.5 Hz); <sup>19</sup>F NMR (470 MHz, MeOD)  $\delta$  -82.50 (t,  $J$  = 10.3 Hz), -111.43 (t,  $J$  = 13.2 Hz), -122.47, -122.65--123.10 (m), -123.81, -124.19 (d,  $J$  = 15.5 Hz), -127.39 (dd,  $J$  = 14.9, 7.2 Hz). GC-MS (EI) Calcd. for C<sub>18</sub>H<sub>7</sub>F<sub>21</sub>O 638.02, HRMS (EI<sup>+</sup>) found 638.0159.

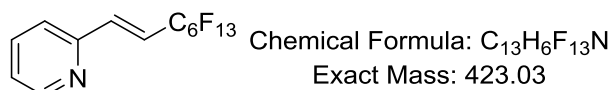

Compound **B8**: purified by column chromatography on silica gel (petroleum ether) to afford the **B8** (34.7 mg, 41%), yellow liquid. <sup>1</sup>H NMR (500 MHz, CDCl<sub>3</sub>)  $\delta$  8.65 (d,  $J$  = 5.3 Hz, 1H), 7.73 (td,  $J$  = 7.7, 1.7 Hz, 1H), 7.36 (d,  $J$  = 7.7 Hz, 1H), 7.29 (dd,  $J$  = 7.6, 4.9 Hz, 1H), 7.20 (d,  $J$  = 15.7 Hz, 1H), 6.94-6.80 (m, 1H); <sup>13</sup>C NMR (126 MHz, CDCl<sub>3</sub>)  $\delta$  150.68, 149.11, 137.56, 135.88, 123.33, 123.09, 117.73 (t,  $J$  = 22.9 Hz); <sup>19</sup>F NMR (470 MHz, CDCl<sub>3</sub>)  $\delta$  -80.78 (t,  $J$  = 10.2 Hz), -111.66 (q,  $J$  = 13.3, 12.1 Hz), -121.05--121.88 (m), -122.74--122.96 (m), -123.15 (tt,  $J$  = 20.3, 9.8 Hz), -126.15 (tt,  $J$  = 11.2, 5.5 Hz). GC-MS (EI) Calcd. for C<sub>13</sub>H<sub>6</sub>F<sub>13</sub>N 423.03, HRMS (EI<sup>+</sup>) found 423.0297.

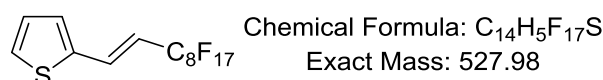

Compound **B9**: purified by column chromatography on silica gel (petroleum ether) to afford the **B9** (33.8 mg, 32%), yellow liquid. <sup>1</sup>H NMR (500 MHz, CDCl<sub>3</sub>)  $\delta$  7.38 (d,  $J$  = 5.0 Hz, 1H), 7.27 (dt,  $J$  = 15.6 Hz, 1H), 7.21 (d,  $J$  = 3.6 Hz, 1H), 7.05 (dd,  $J$  = 5.1, 3.6 Hz, 1H), 6.00 (dt,  $J$  = 15.9, 12.3 Hz, 1H); <sup>13</sup>C NMR (126 MHz, CDCl<sub>3</sub>)  $\delta$  138.39, 132.57, 130.36, 128.16, 128.09, 112.96 (t,  $J$  = 22.8 Hz); <sup>19</sup>F NMR (470 MHz, CDCl<sub>3</sub>)  $\delta$  -81.02 (t,  $J$  = 10.3 Hz), -111.04 (t,  $J$  = 13.0 Hz), -121.64 (q,  $J$  = 13.2, 12.0 Hz), -122.15 (tt,  $J$  = 21.2, 11.5 Hz), -122.96 (dt,  $J$  = 20.3, 10.1 Hz), -123.32 (q,  $J$  = 14.3, 10.4 Hz), -126.36 (t,  $J$  = 13.7 Hz). GC-MS (EI) Calcd. for C<sub>14</sub>H<sub>5</sub>F<sub>17</sub>S 527.98, found 528.01.

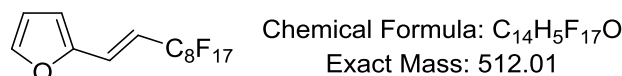

Compound **B10**: purified by column chromatography on silica gel (petroleum ether) to afford the **B10** (36.9 mg, 36%), yellow liquid. <sup>1</sup>H NMR (500 MHz, CDCl<sub>3</sub>)  $\delta$  7.47 (d,  $J$  = 1.7 Hz, 1H), 6.93 (d,  $J$  = 15.9 Hz, 1H), 6.58-6.42 (m, 2H), 6.13 (dt,  $J$  = 16.0, 12.9 Hz, 1H); <sup>13</sup>C NMR (126 MHz, CDCl<sub>3</sub>)  $\delta$

151.41, 148.64, 143.43, 125.62, 112.85, 111.08 (t,  $J = 39.7$  Hz);  $^{19}\text{F}$  NMR (470 MHz,  $\text{CDCl}_3$ )  $\delta$  -80.75 (t,  $J = 10.4$  Hz), -111.11, -120.15--121.71 (m), -121.91 (dt,  $J = 19.1, 8.4$  Hz), -122.42--122.91 (m), -122.91--123.40 (m), -124.95--127.70 (m). GC-MS (EI) Calcd. for  $\text{C}_{14}\text{H}_5\text{F}_{17}\text{O}$  512.01, HRMS ( $\text{EI}^+$ ) found 528.0071.

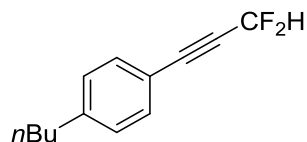

Chemical Formula:  $\text{C}_{13}\text{H}_{14}\text{F}_2$   
Exact Mass: 208.11

Compound (**C1**): purified by column chromatography on silica gel (petroleum ether) to afford the **C1** (based on 91%  $^{19}\text{F}$  NMR yield, the calculated yield is 31%), colorless liquid.  $^1\text{H}$  NMR (500 MHz,  $\text{CDCl}_3$ )  $\delta$  7.42 (d,  $J = 8.0$  Hz, 2H), 7.17 (d,  $J = 8.0$  Hz, 2H), 6.41 (t,  $J = 55.2$  Hz, 1H), 2.67-2.57 (m, 2H), 1.64-1.56 (m, 2H), 1.35 (dt,  $J = 14.9, 7.4$  Hz, 2H), 0.92 (t,  $J = 7.3$  Hz, 3H).  $^{13}\text{C}$  NMR (126 MHz,  $\text{CDCl}_3$ )  $\delta$  145.65, 132.23, 128.76, 117.09, 104.44 (t,  $J = 231.8$  Hz), 88.94, 79.37, 35.79, 33.39, 22.41, 14.03;  $^{19}\text{F}$  NMR (470 MHz,  $\text{CDCl}_3$ )  $\delta$  -104.85. GC-MS (EI) Calcd. for  $\text{C}_{13}\text{H}_{14}\text{F}_2$  208.11, found 208.13.

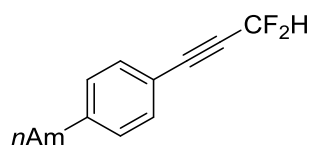

Chemical Formula:  $\text{C}_{14}\text{H}_{16}\text{F}_2$   
Exact Mass: 222.12

Compound (**C2**): purified by column chromatography on silica gel (petroleum ether) to afford the **C2** (based on 90%  $^{19}\text{F}$  NMR yield, the calculated yield is 37%), colorless liquid.  $^1\text{H}$  NMR (500 MHz,  $\text{CDCl}_3$ )  $\delta$  7.43 (d,  $J = 8.1$  Hz, 2H), 7.17 (d,  $J = 7.8$  Hz, 2H), 6.41 (t,  $J = 55.2$  Hz, 1H), 2.66-2.56 (m, 2H), 1.61 (dd,  $J = 10.2, 4.5$  Hz, 2H), 1.34-1.29 (m, 4H), 0.89 (t,  $J = 7.0$  Hz, 3H).  $^{13}\text{C}$  NMR (126 MHz,  $\text{CDCl}_3$ )  $\delta$  145.70, 132.23, 128.76, 117.09, 104.45 (t,  $J = 231.8$  Hz), 88.94, 36.08, 31.54, 30.96, 22.64, 14.14.  $^{19}\text{F}$  NMR (470 MHz,  $\text{CDCl}_3$ )  $\delta$  -104.85. GC-MS (EI) Calcd. for  $\text{C}_{14}\text{H}_{16}\text{F}_2$  222.12, found 222.16.

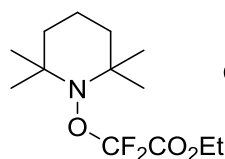

Chemical Formula:  $\text{C}_{13}\text{H}_{23}\text{F}_2\text{NO}_3$   
Exact Mass: 279.16

Compound (**5**)<sup>8</sup>: purified by column chromatography on silica gel (petroleum ether/EtOAc = 25:1) to afford the **5**, yellow liquid.  $^1\text{H}$  NMR (500 MHz,  $\text{CDCl}_3$ )  $\delta$  4.34 (q,  $J = 7.1$  Hz, 2H), 1.61-1.51 (m, 6H), 1.35 (t,  $J = 7.1$  Hz, 3H), 1.17 (d,  $J = 13.1$  Hz, 12H);  $^{13}\text{C}$  NMR (126 MHz,  $\text{CDCl}_3$ )  $\delta$  60.36, 39.17, 32.40, 19.73, 15.89;  $^{19}\text{F}$  NMR (470 MHz,  $\text{CDCl}_3$ )  $\delta$  -73.44. GC-MS (EI) Calcd. for  $\text{C}_{13}\text{H}_{23}\text{F}_2\text{NO}_3$  279.16, found 279.20.

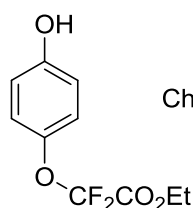

Chemical Formula:  $\text{C}_{10}\text{H}_{10}\text{F}_2\text{O}_4$   
Exact Mass: 232.05

Compound (**6**): purified by column chromatography on silica gel (petroleum ether/EtOAc = 30:1) to afford the **6**, brown liquid.  $^1\text{H}$  NMR (500 MHz,  $\text{CDCl}_3$ )  $\delta$  7.09 (d,  $J = 8.5$  Hz, 2H), 6.87-6.76 (m, 2H), 4.38 (q,  $J = 7.2$  Hz, 2H), 1.37 (t,  $J = 7.1$  Hz, 3H);  $^{13}\text{C}$  NMR (126 MHz,  $\text{CDCl}_3$ )  $\delta$  187.34, 136.68, 123.41, 116.11, 63.73, 13.98;  $^{19}\text{F}$  NMR (470 MHz,  $\text{CDCl}_3$ )  $\delta$  -75.58. GC-MS (EI) Calcd. for  $\text{C}_{10}\text{H}_{10}\text{F}_2\text{O}_4$  232.05, found 232.07.

## References

- [1] M.-C. Belhomme, D. Dru, H.-Y. Xiong, D. Cahard, T. Besset, T. Poisson and X. Pannecoucke, *Synthesis*, 2014, **46**, 1859-1870.
- [2] G. Li, Y.-X. Cao, C.-G. Luo, Y.-M. Su, Y. Li, Q. Lan and X.-S. Wang, *Org. Lett.* 2016, **18**, 4806-4809.
- [3] X. Fang, X.-Y. Yang, X.-J. Yang, S.-J. Mao, Z.-H. Wang, G.-R. Chen and F.-H. Wu, *Tetrahedron*, 2007, **63**, 10684-10692.
- [4] M. P. Jennings, E. A. Cork and P. V. Ramachandran, *J. Org. Chem.* 2000, **65**, 8763-8766
- [5] T. Xu, C.-W. Cheung and X.-L. Hu, *Angew. Chem. Int. Ed.* 2014, **53**, 4910-4914.
- [6] R. Beniazza, R. Atkinson, C. Absalon, F. Castet, S. A. Denisov, N. D. McClenaghan, D. Lastéclouères and J.-M. Vincent, *Adv. Synth. Catal.* 2016, **358**, 2949-2961.
- [7] Y.-L. Lai, D.-Z. Lin and J.-M. Huang, *J. Org. Chem.* 2017, **82**, 597-605.
- [8] G.-B. Ma, W. Wan, J.-L. Li, Q.-Y. Hu, H.-Z. Jiang, S.-Z. Zhu, J. Wang and J. Hao, *Chem. Commun.* 2014, **50**, 9749-9752

## 6. NMR Spectra of compounds.

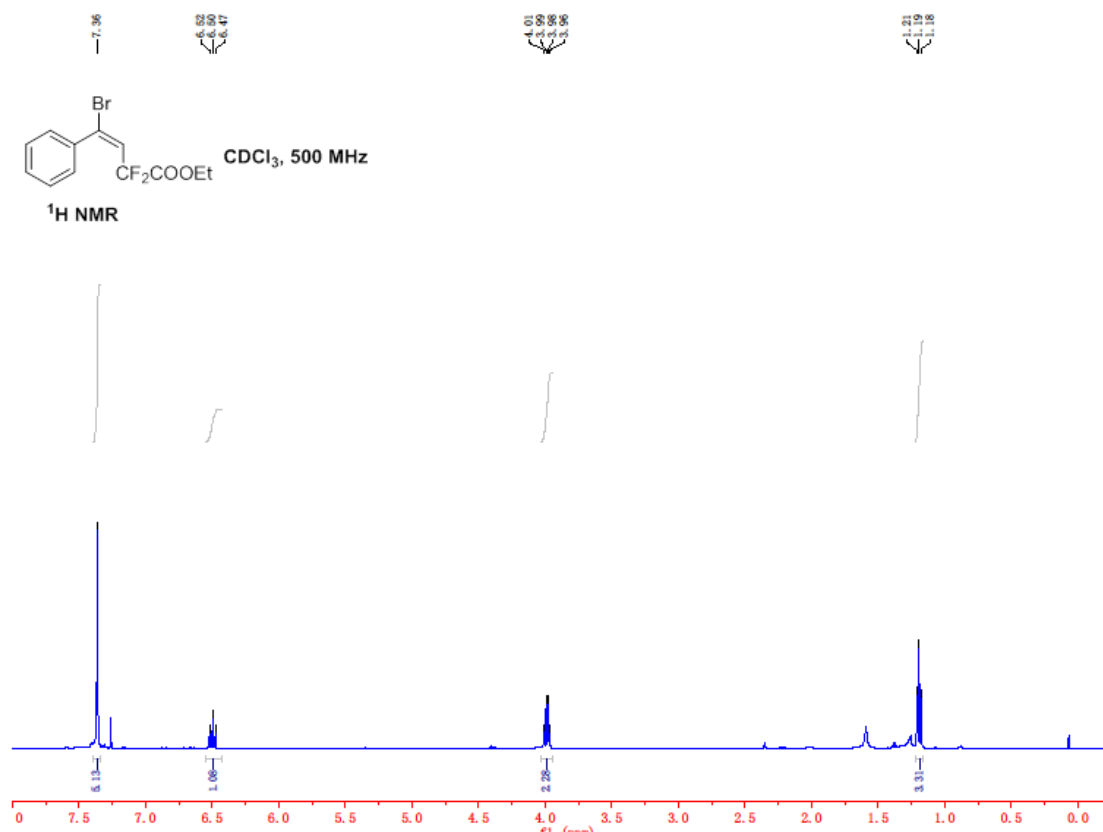

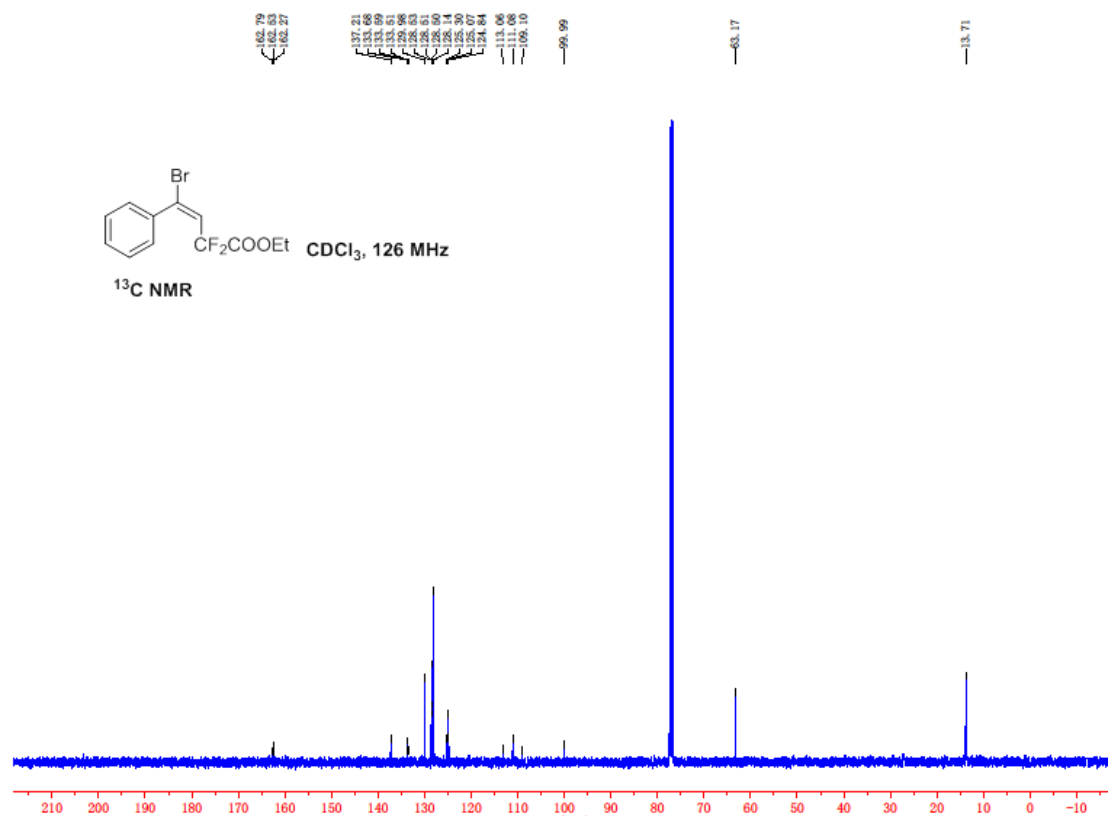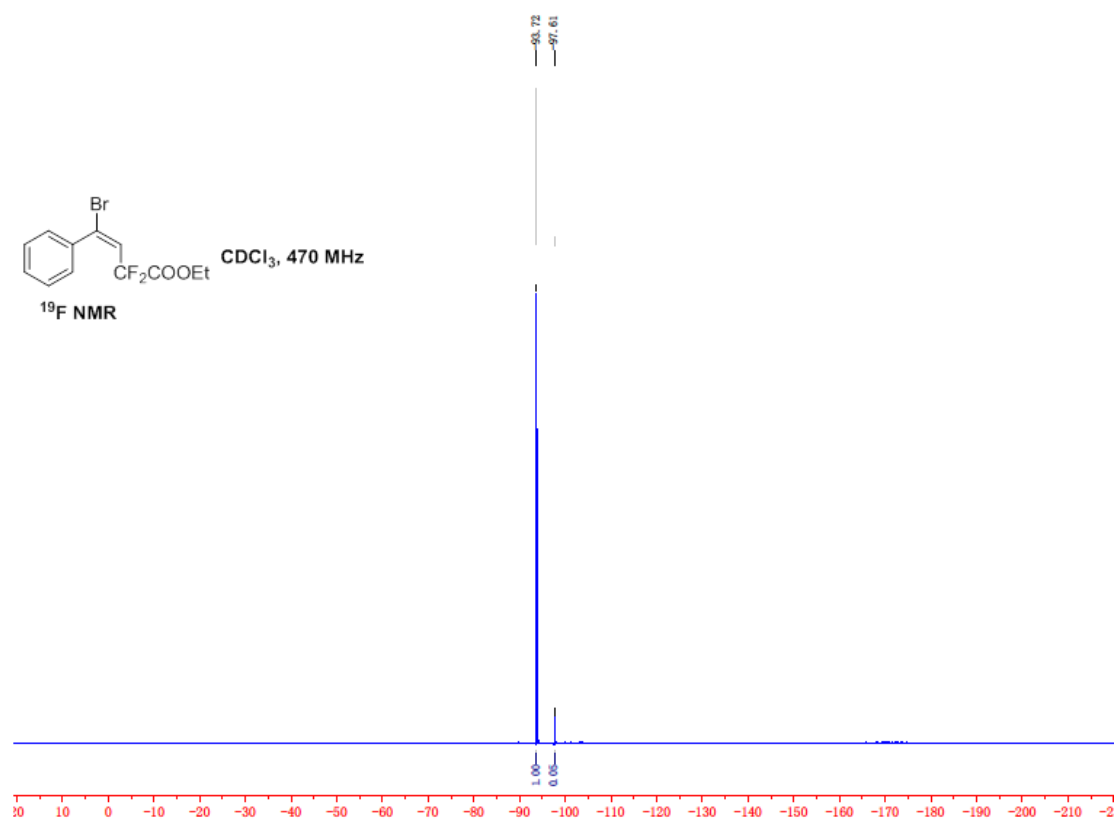

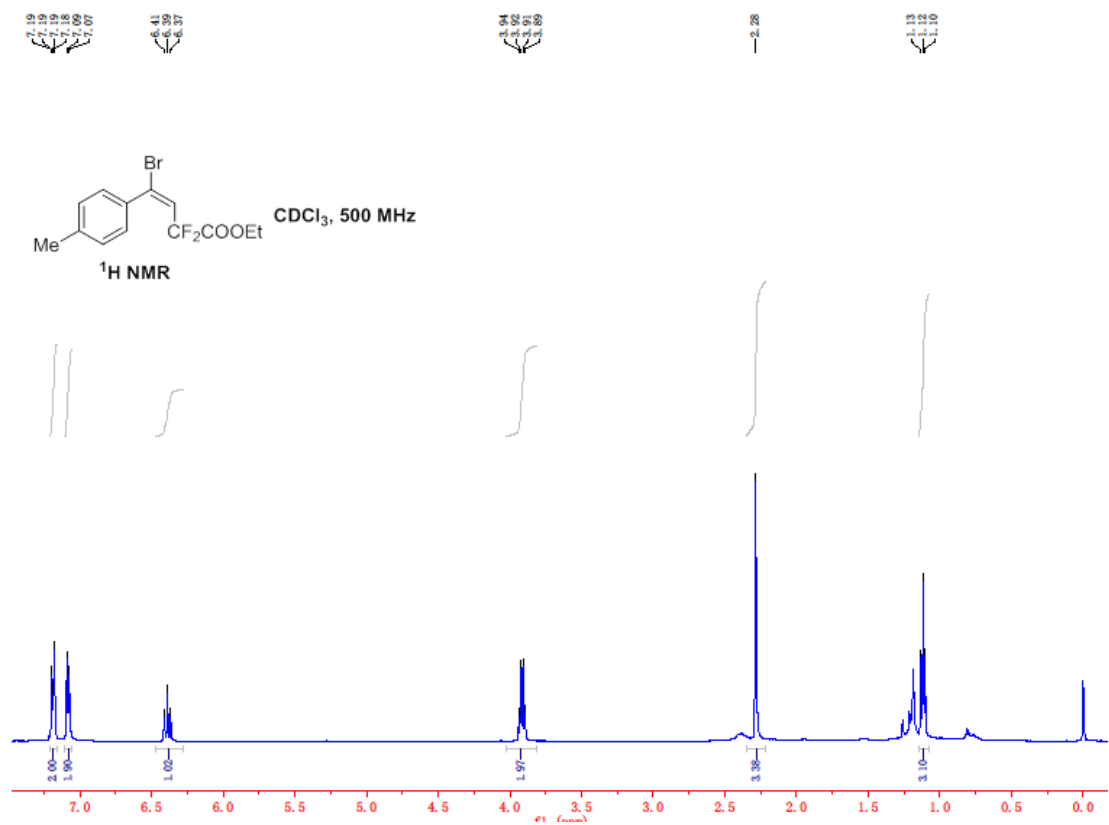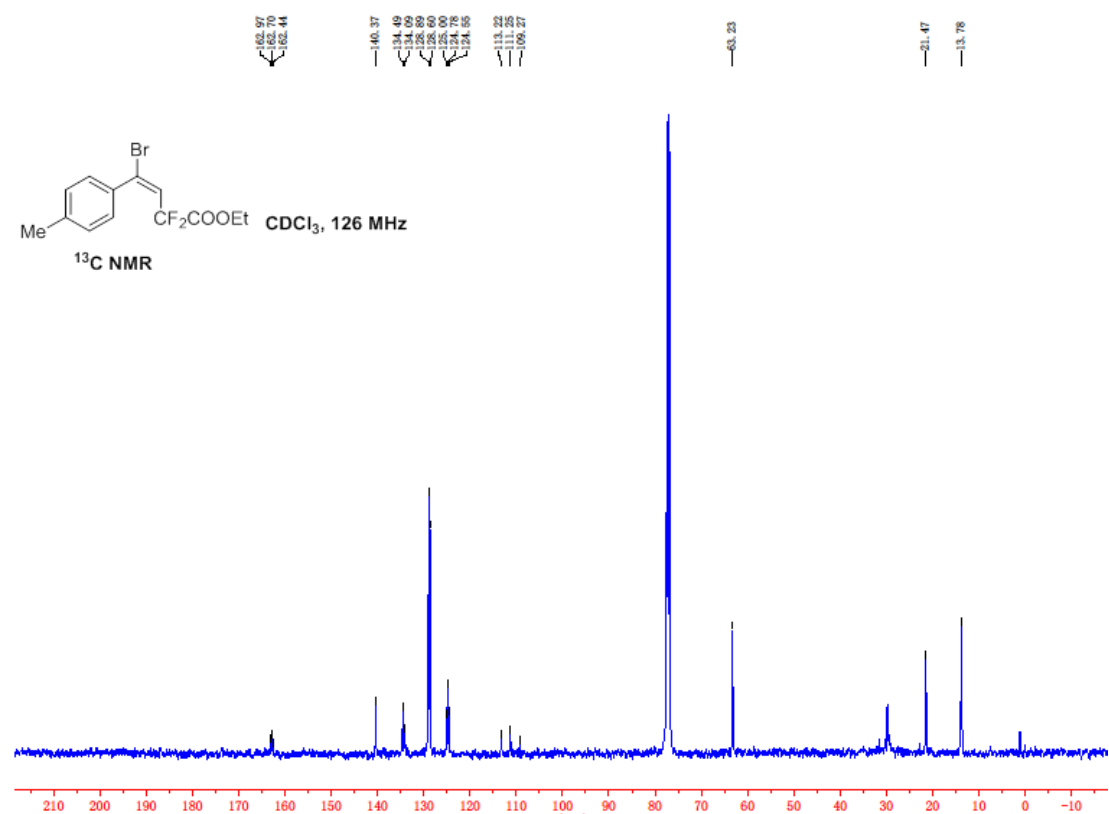

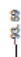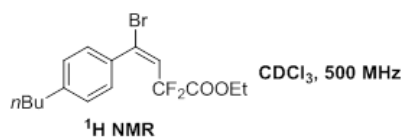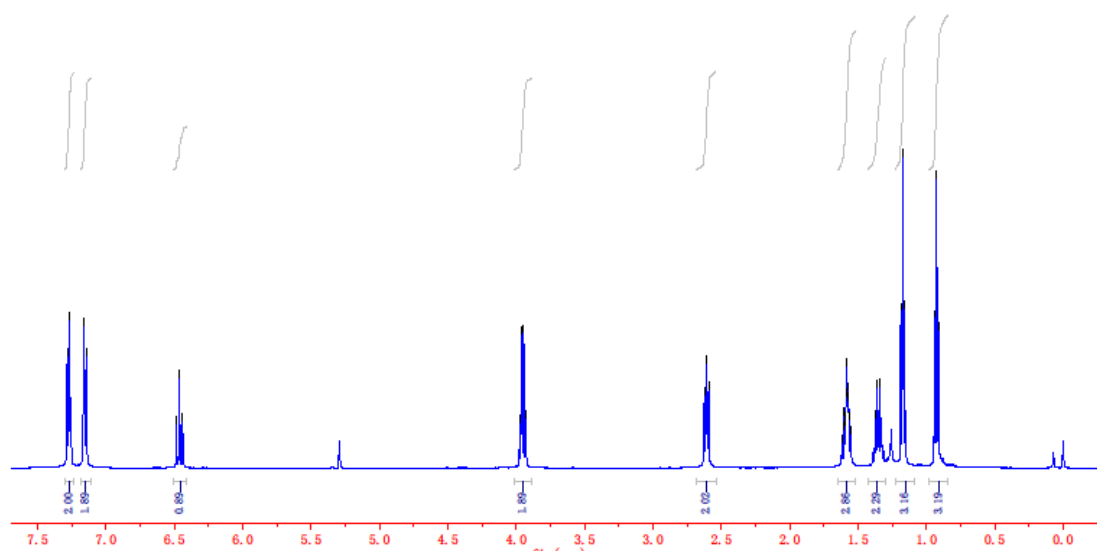

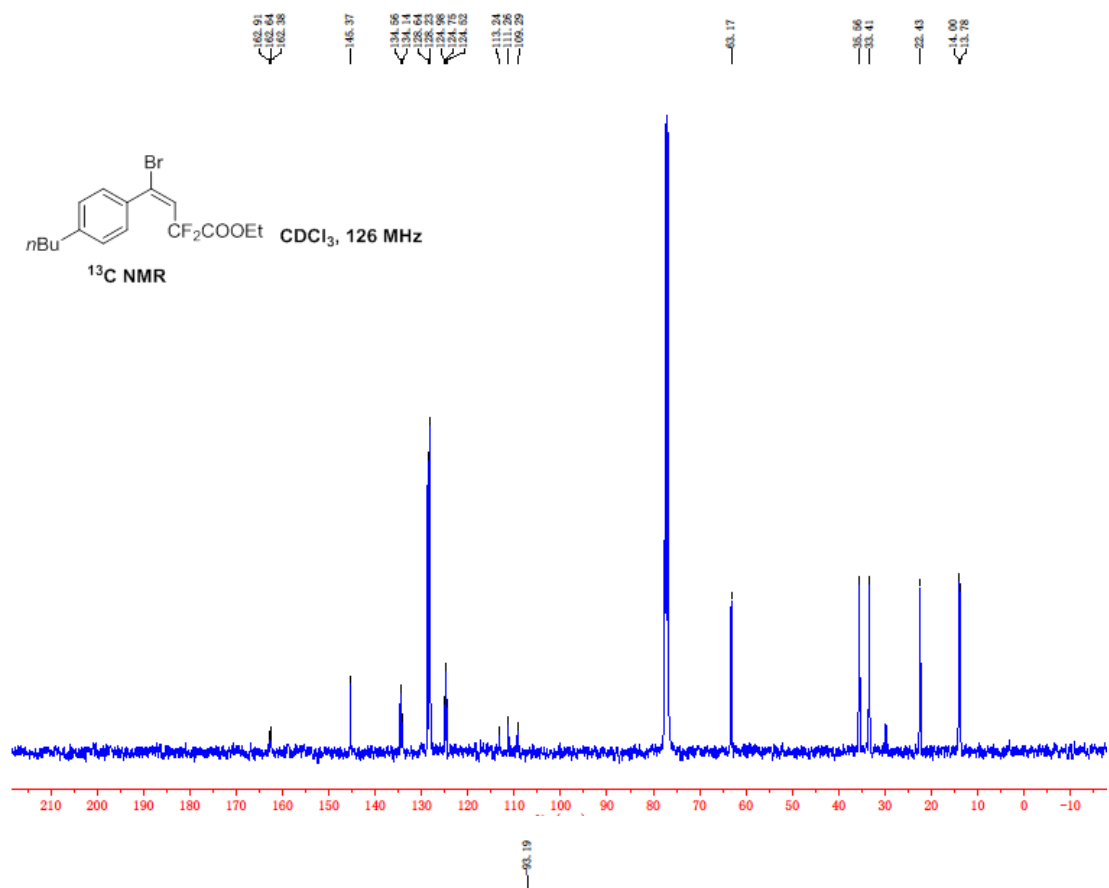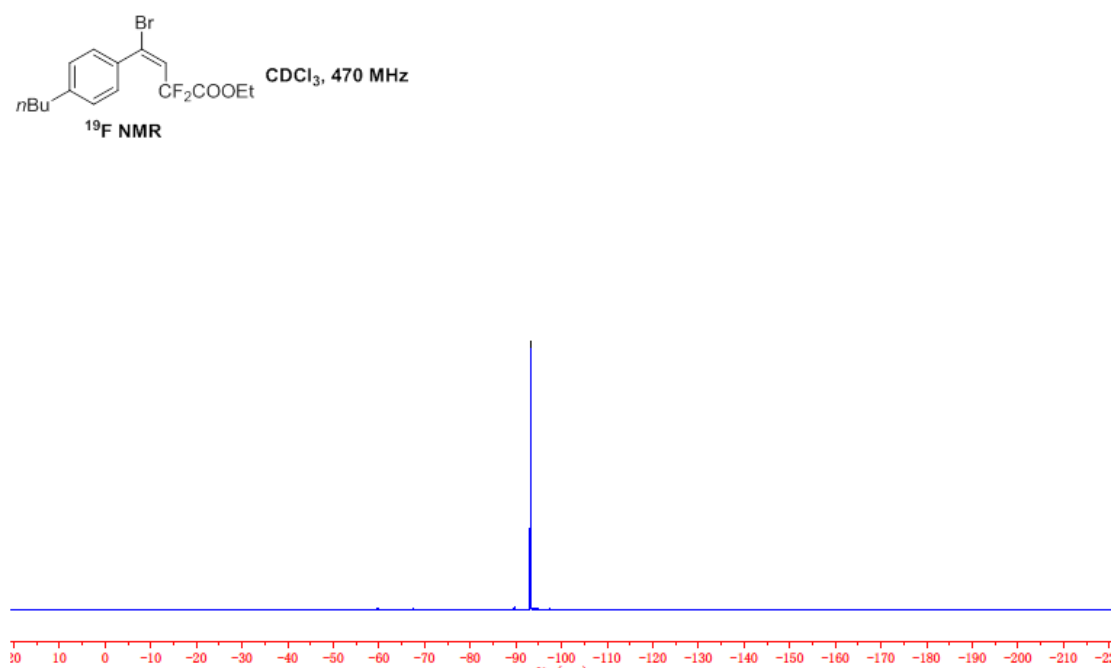



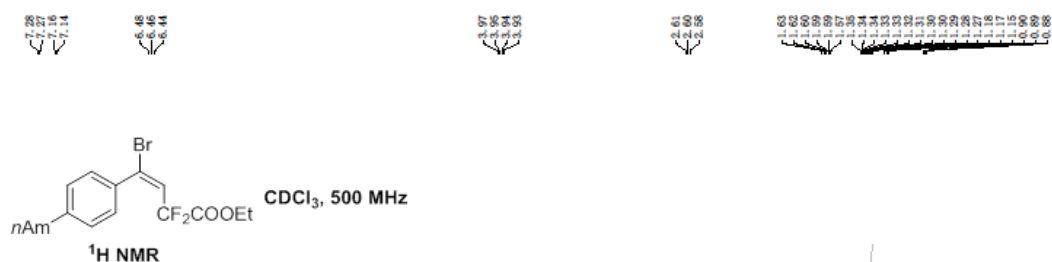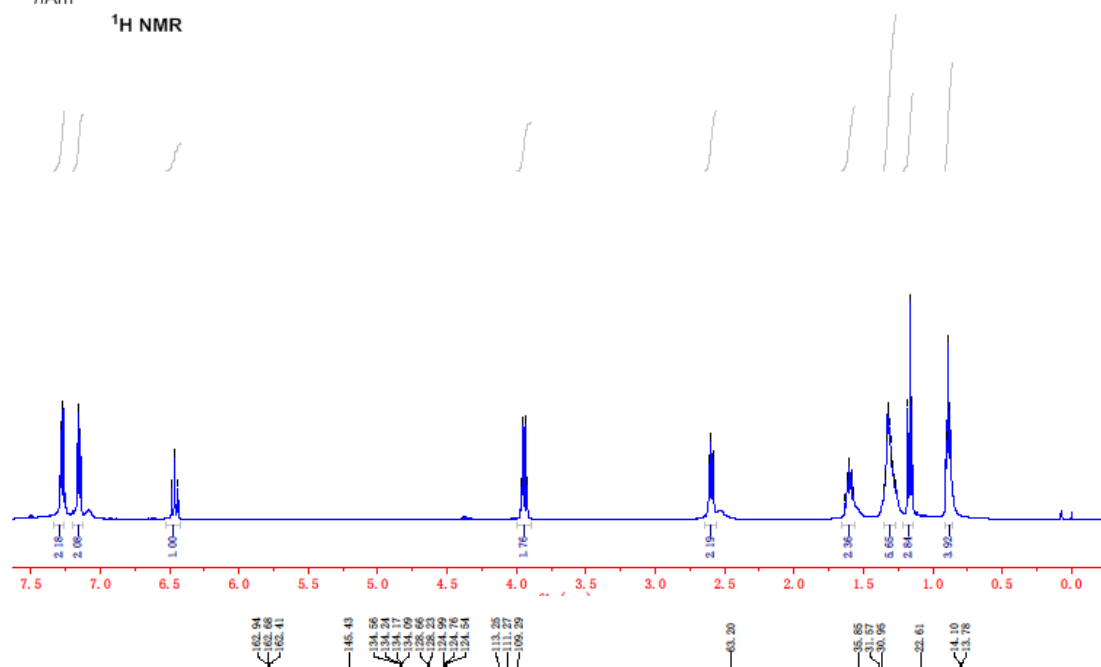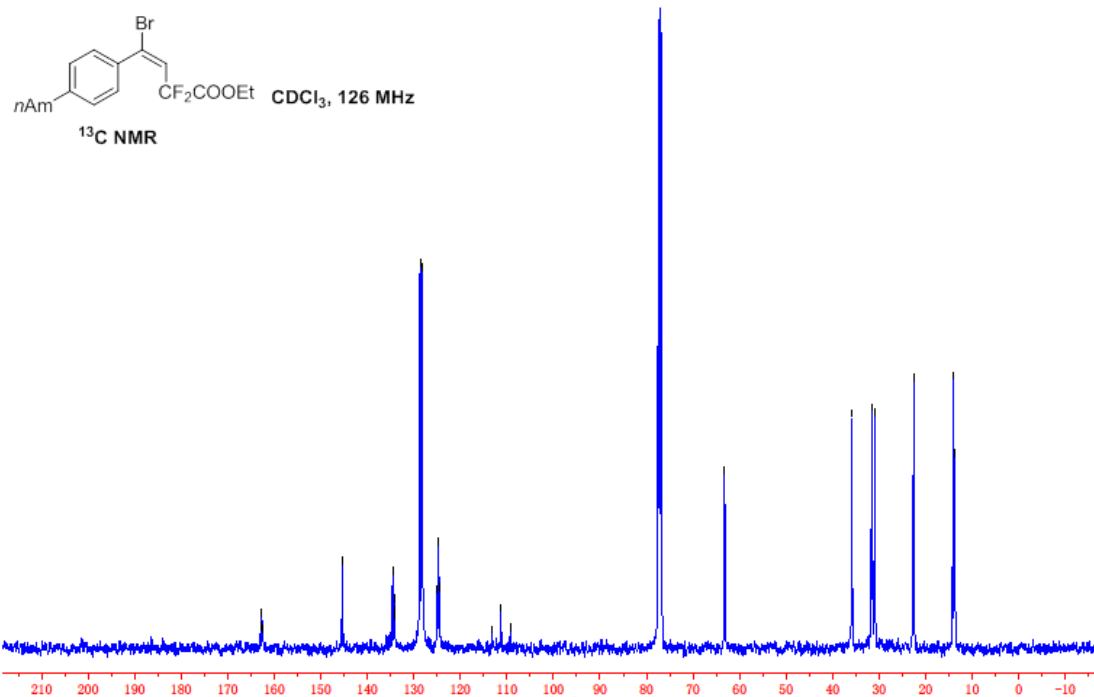

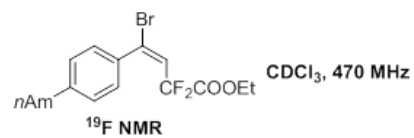

CDCl<sub>3</sub>, 470 MHz

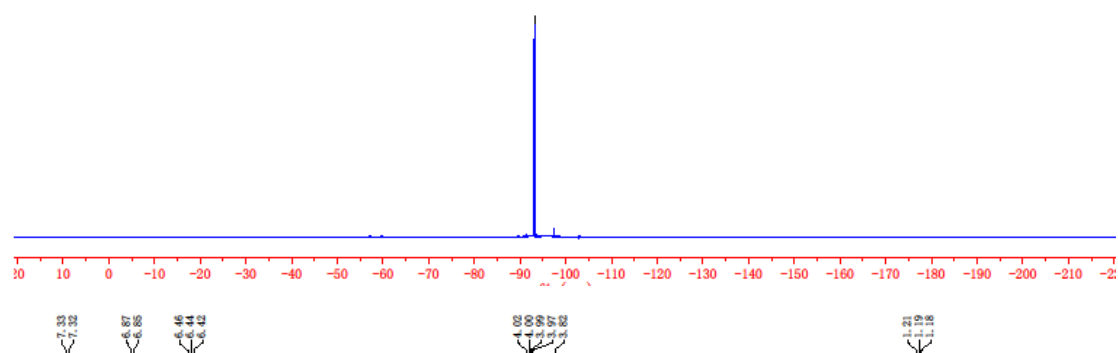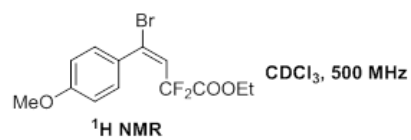

CDCl<sub>3</sub>, 500 MHz

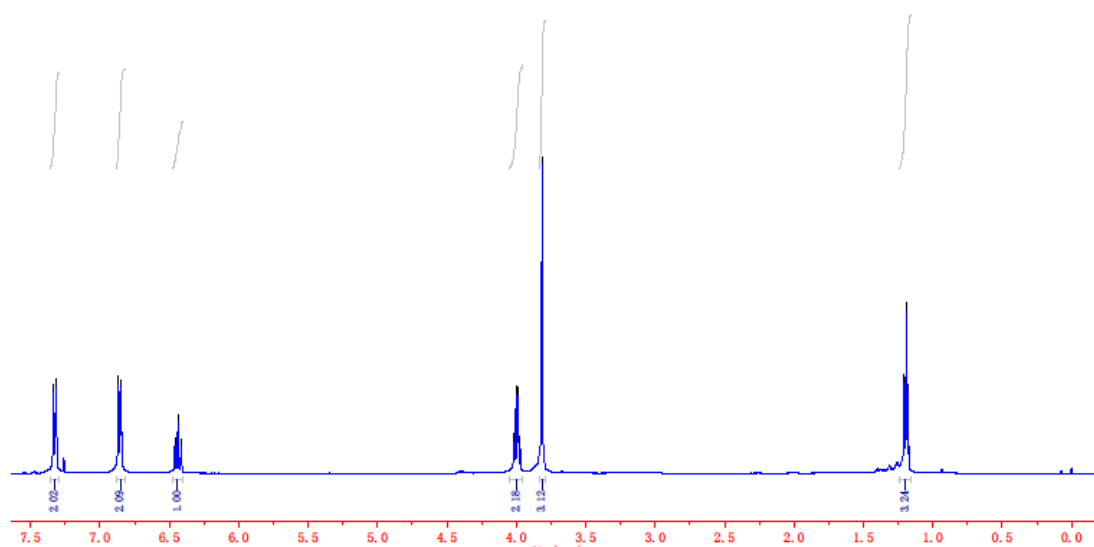

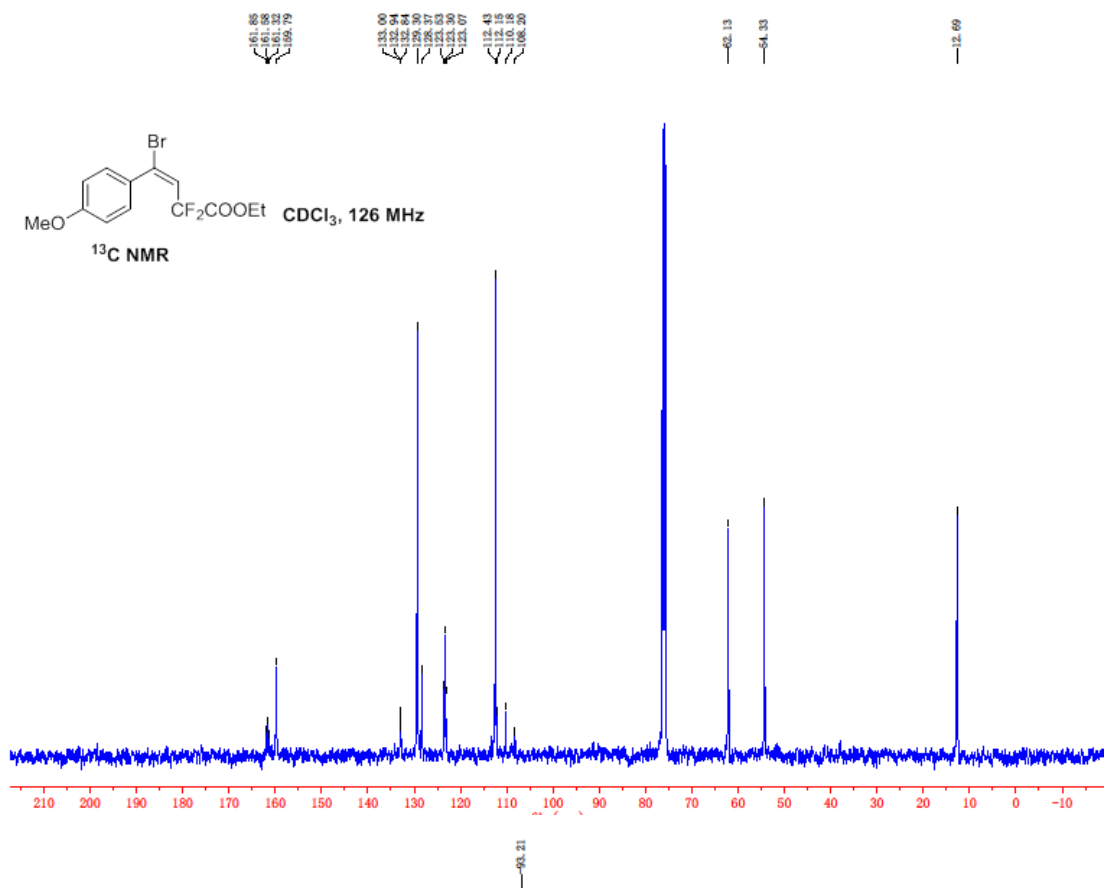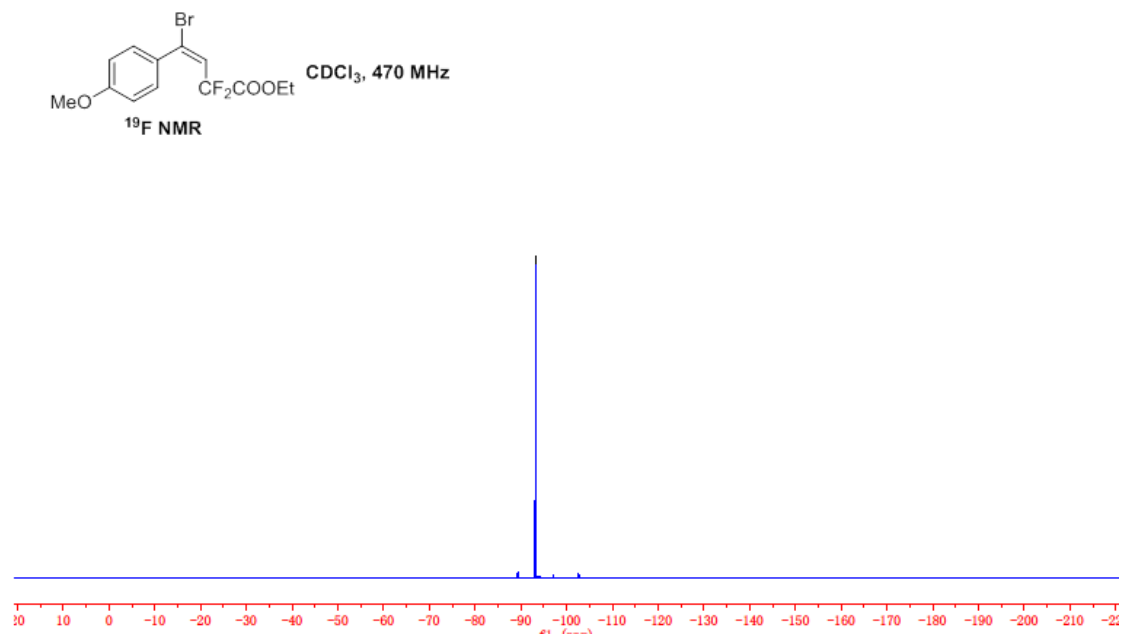

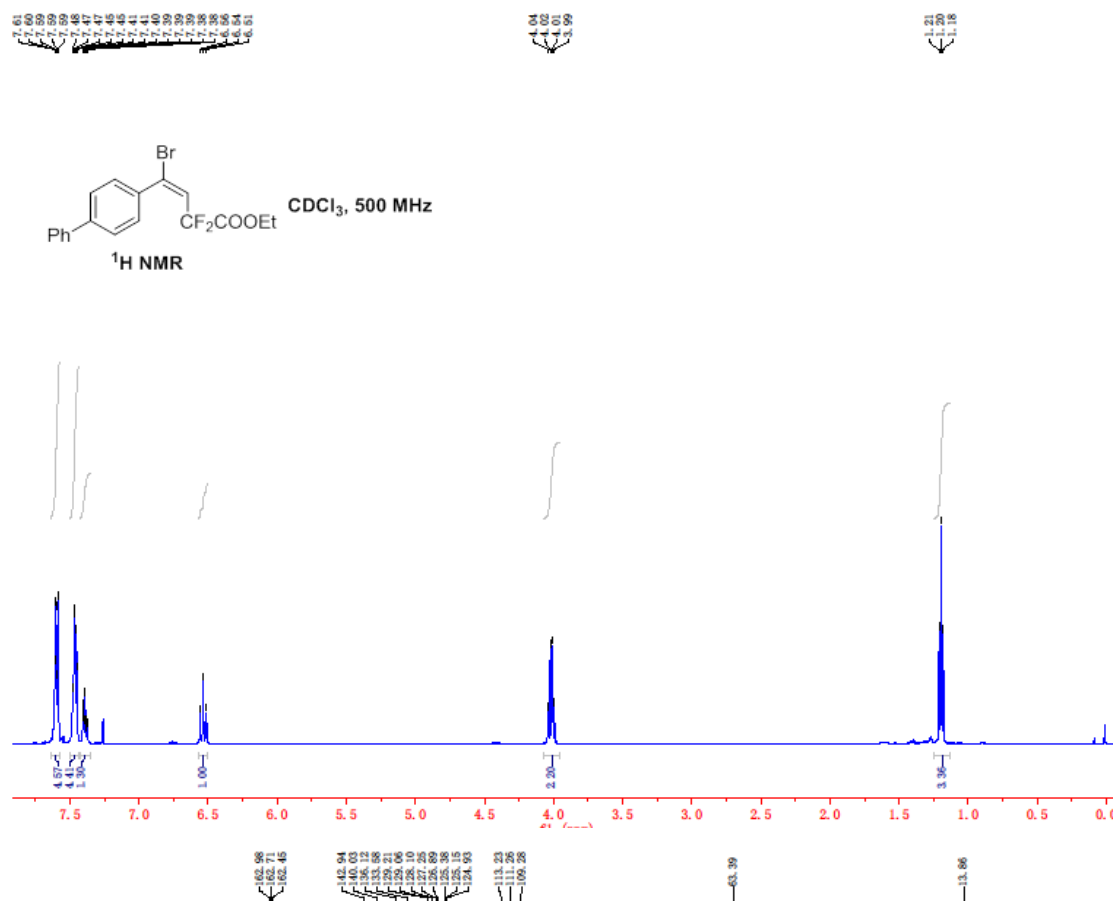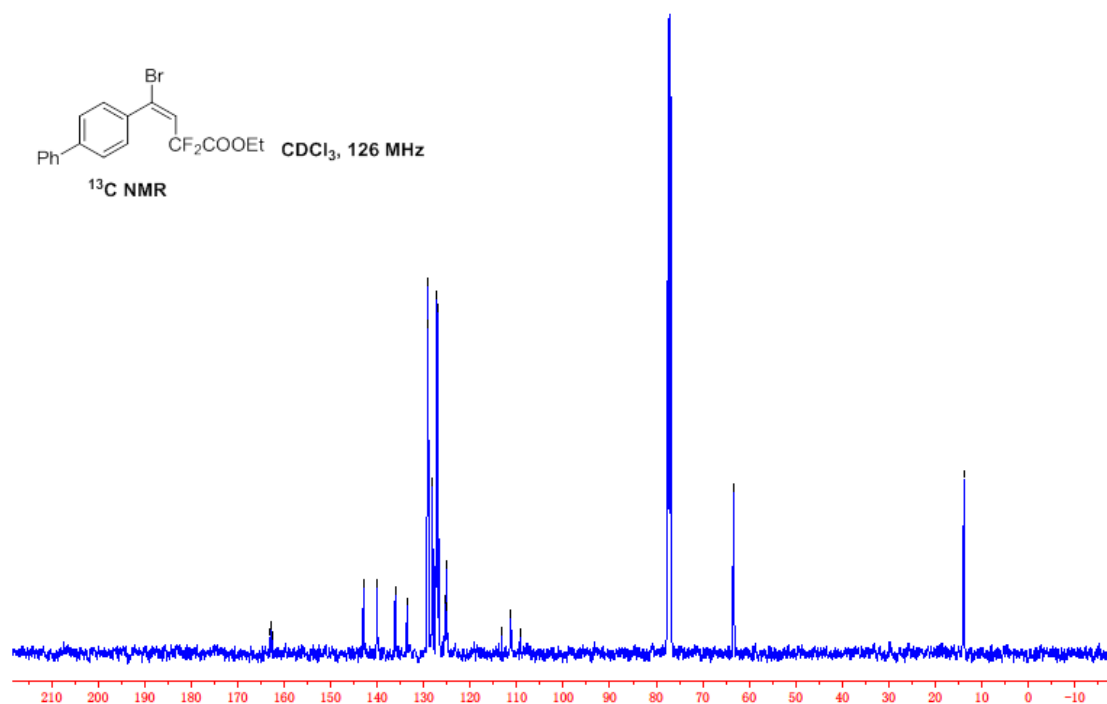

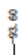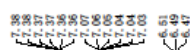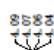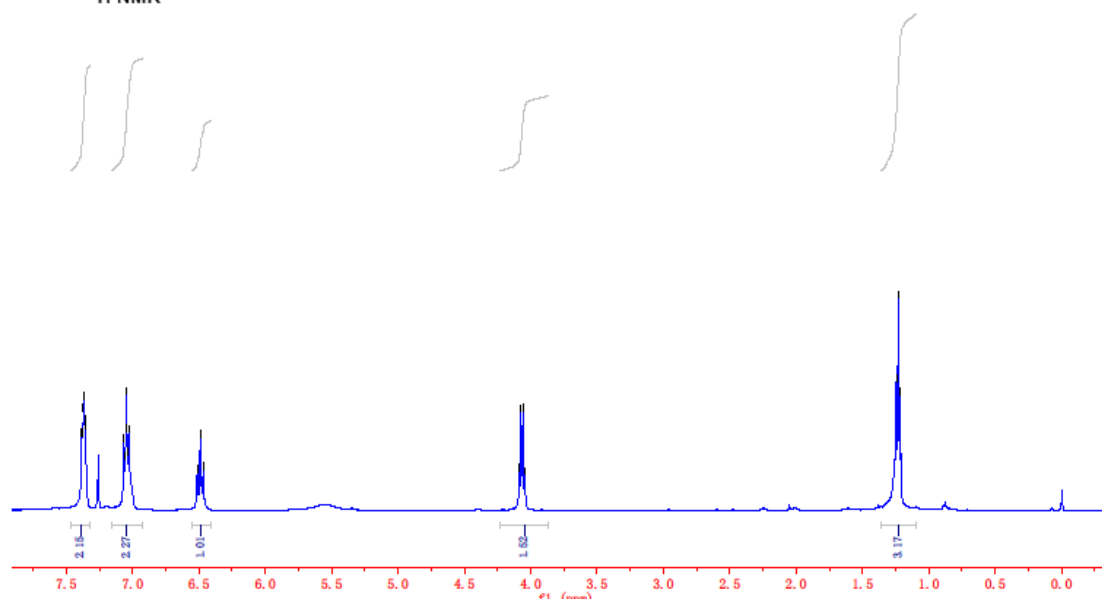

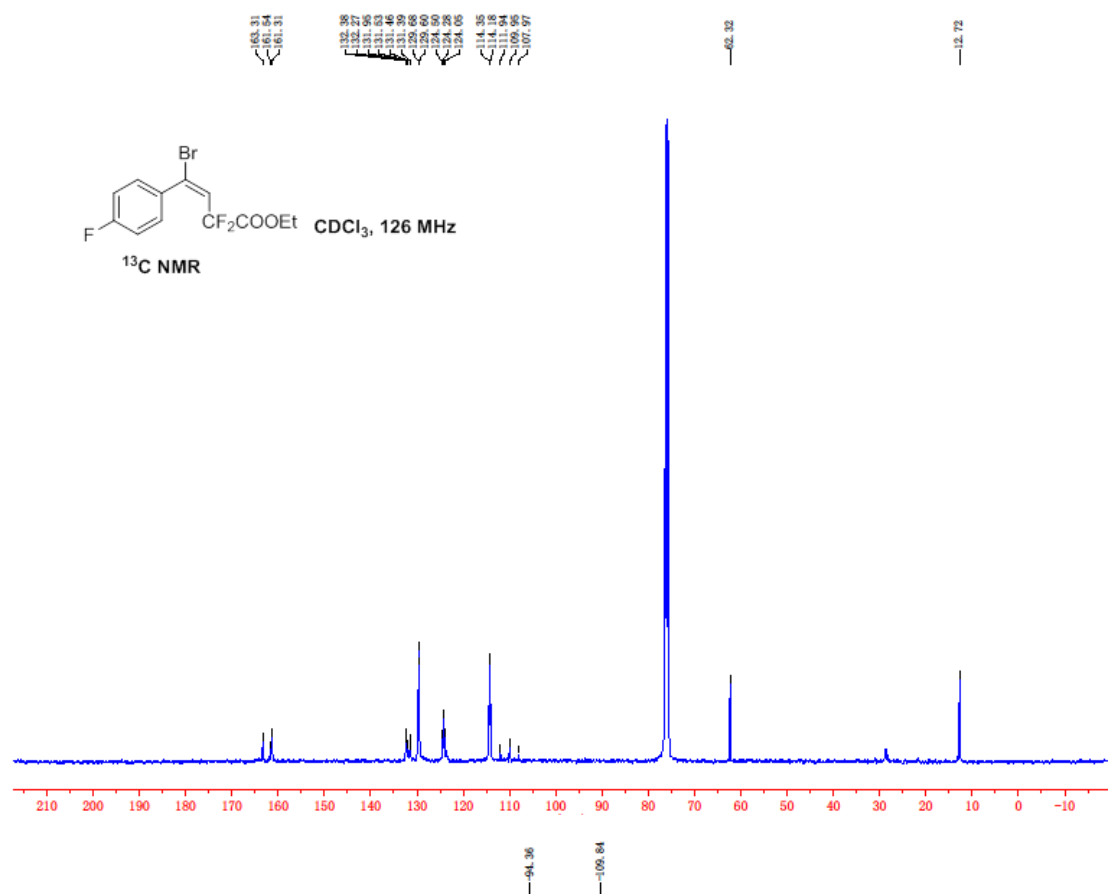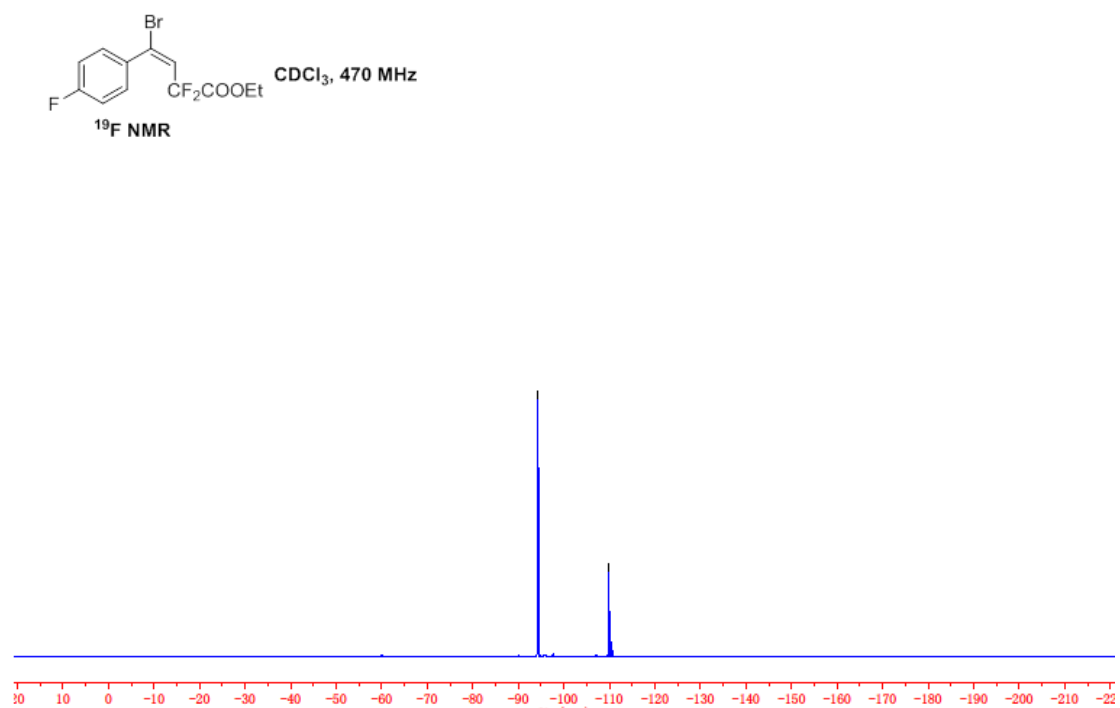

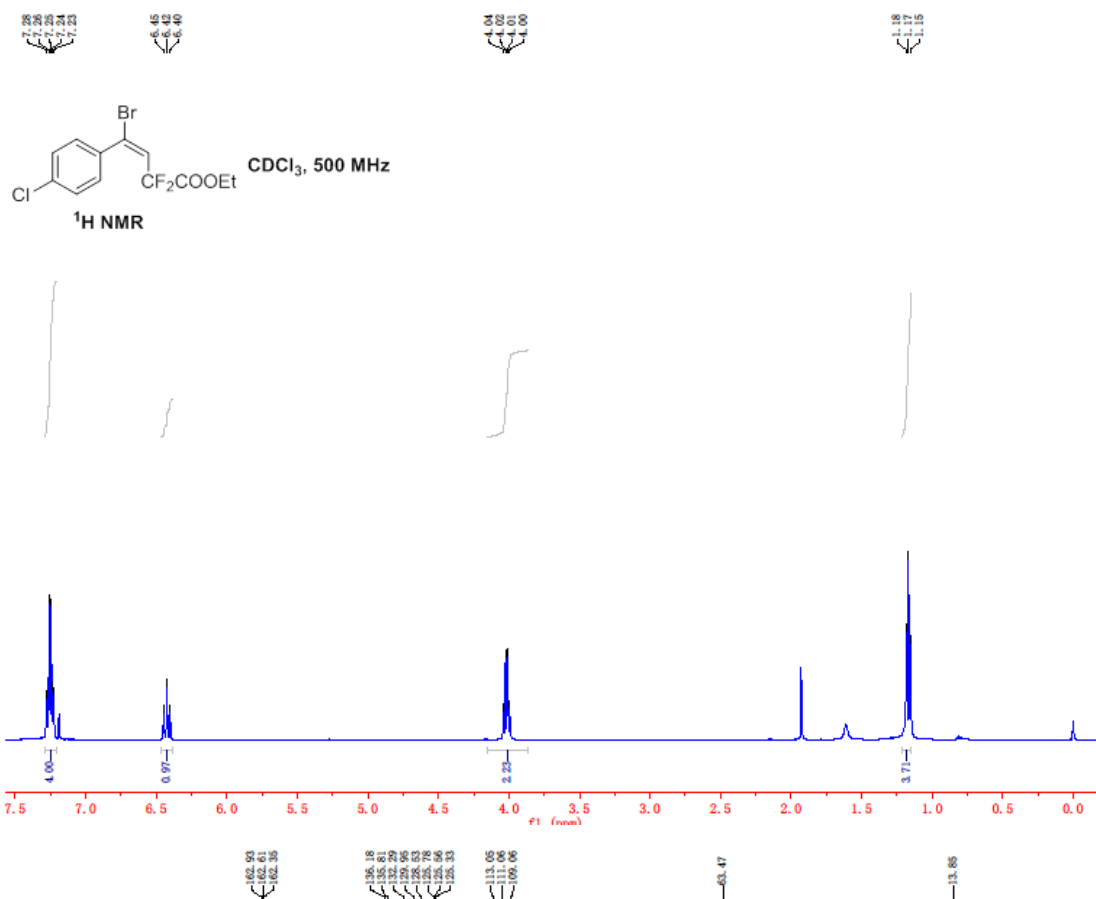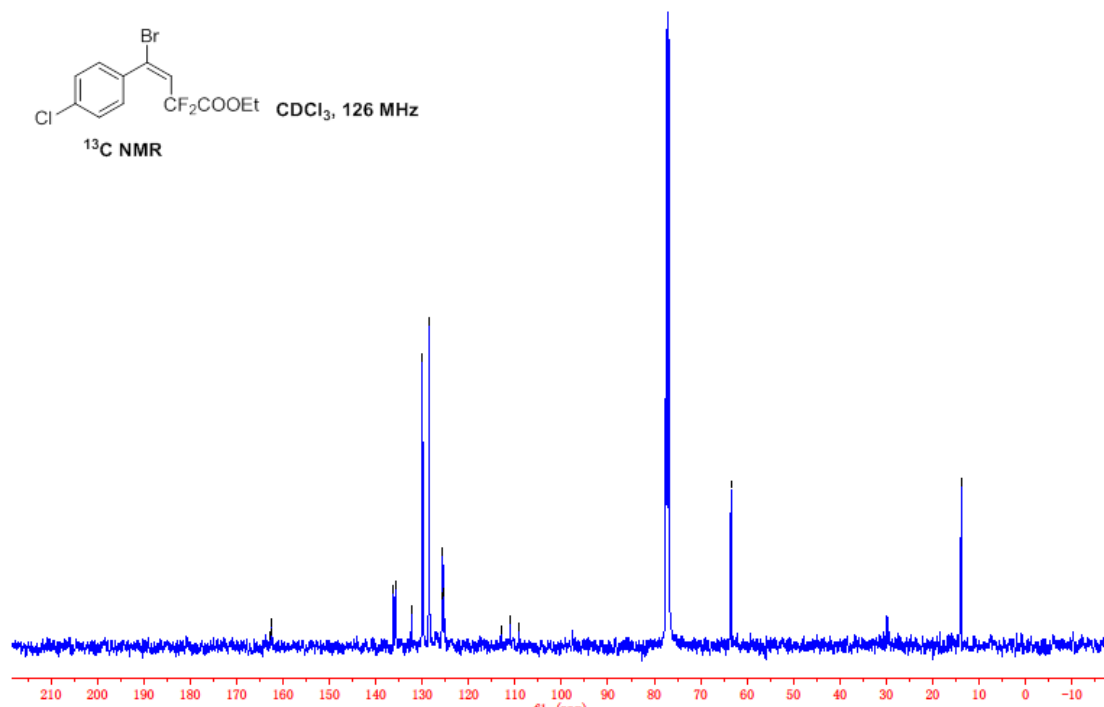

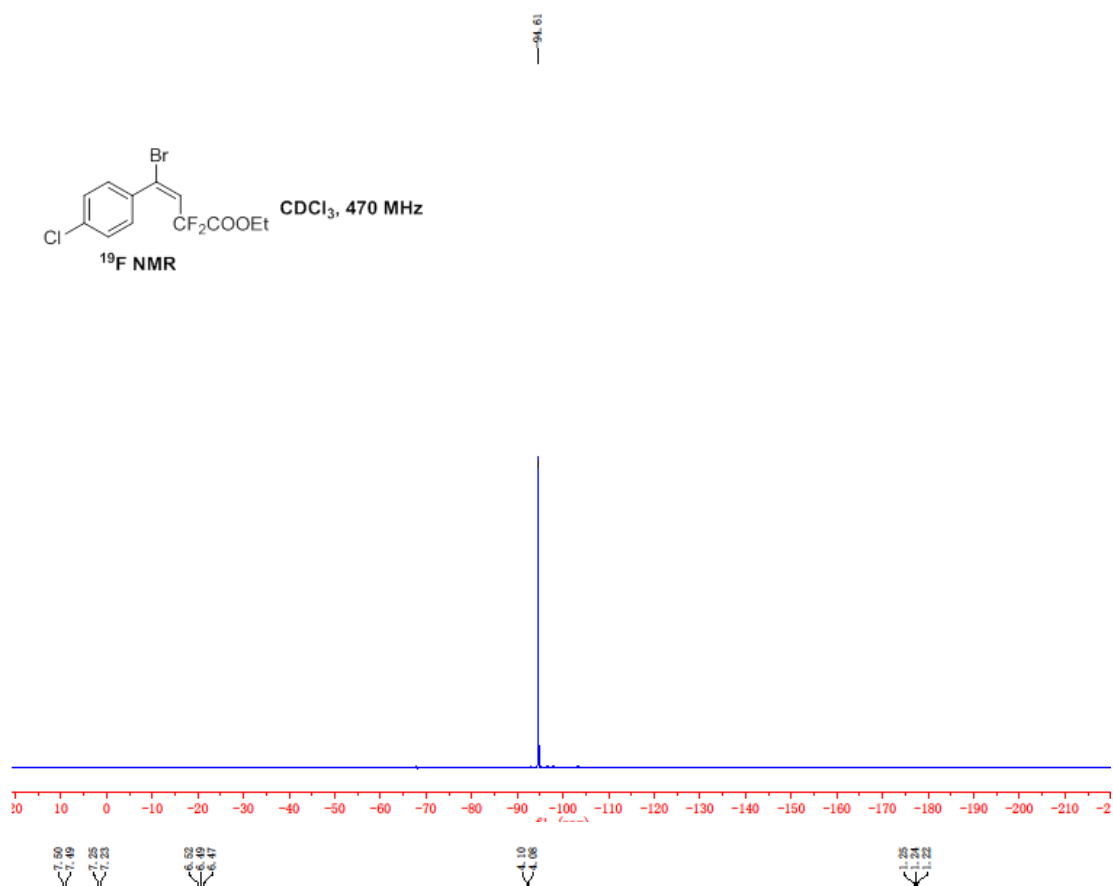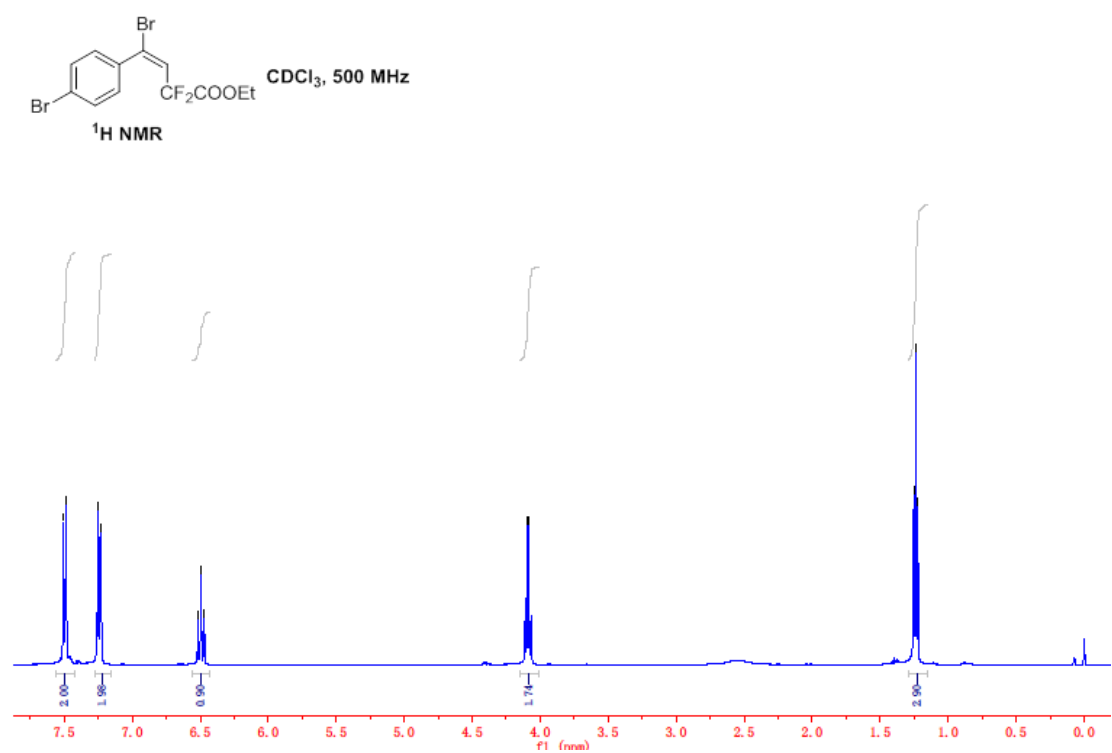



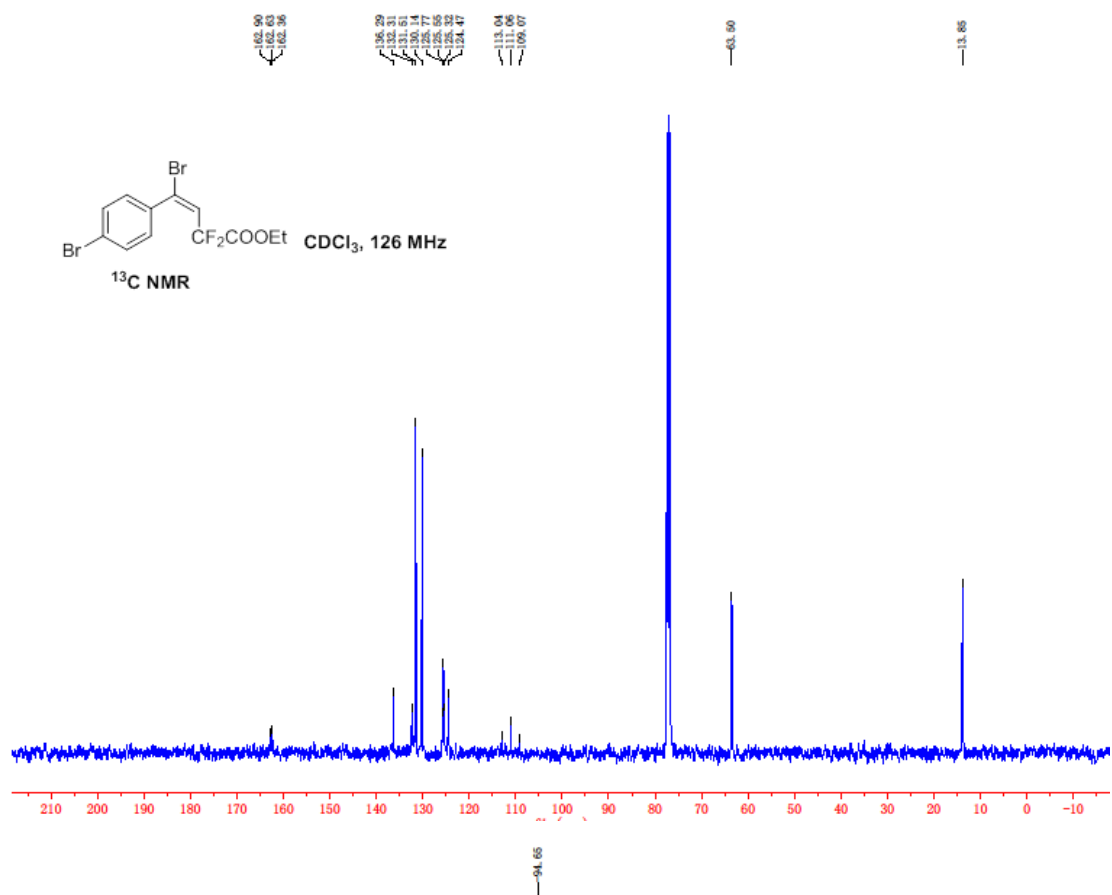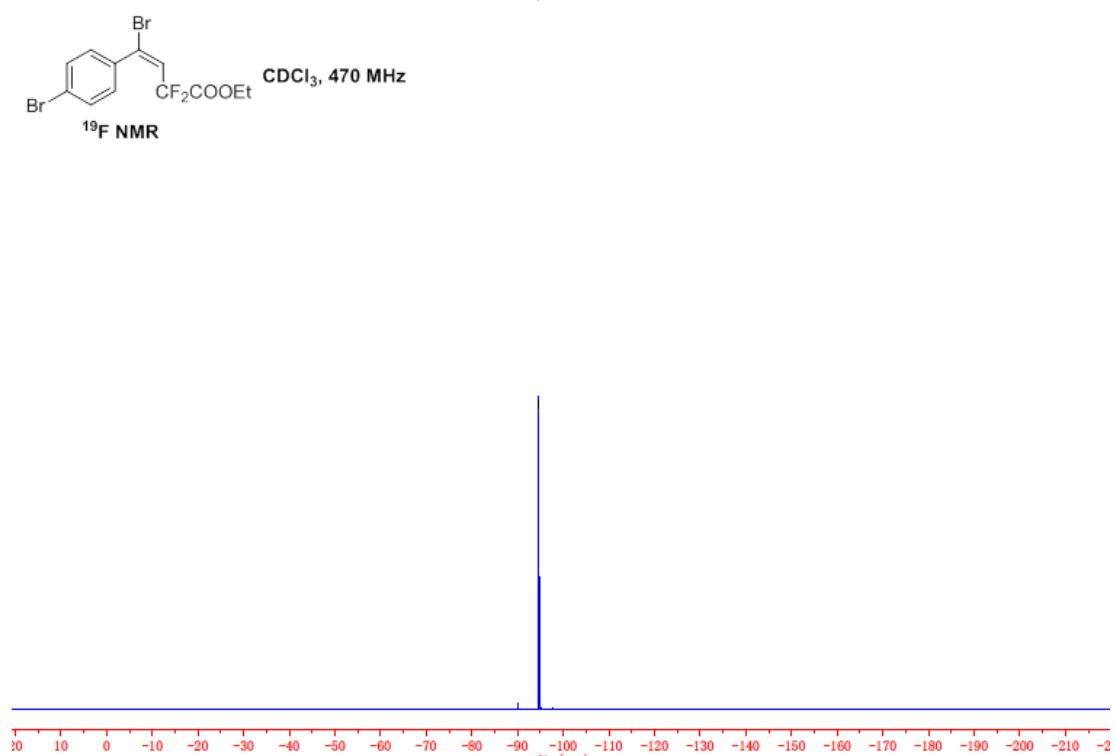

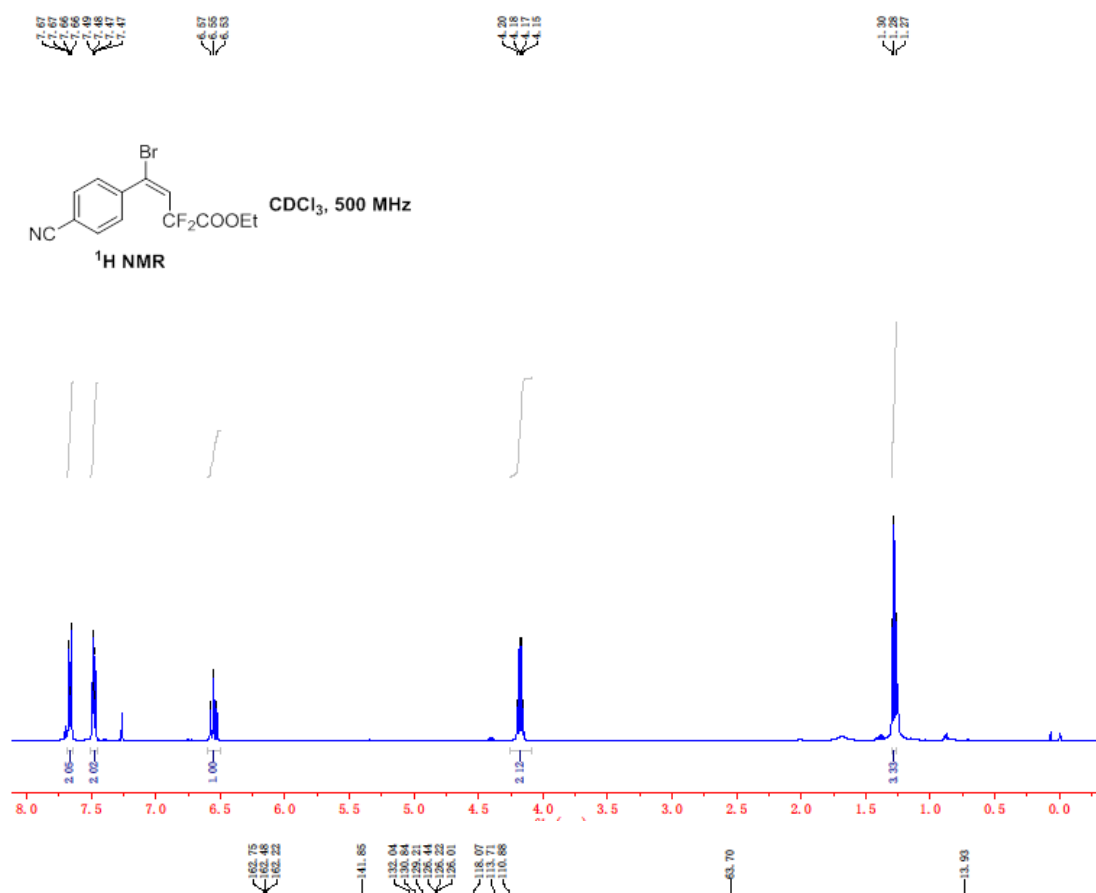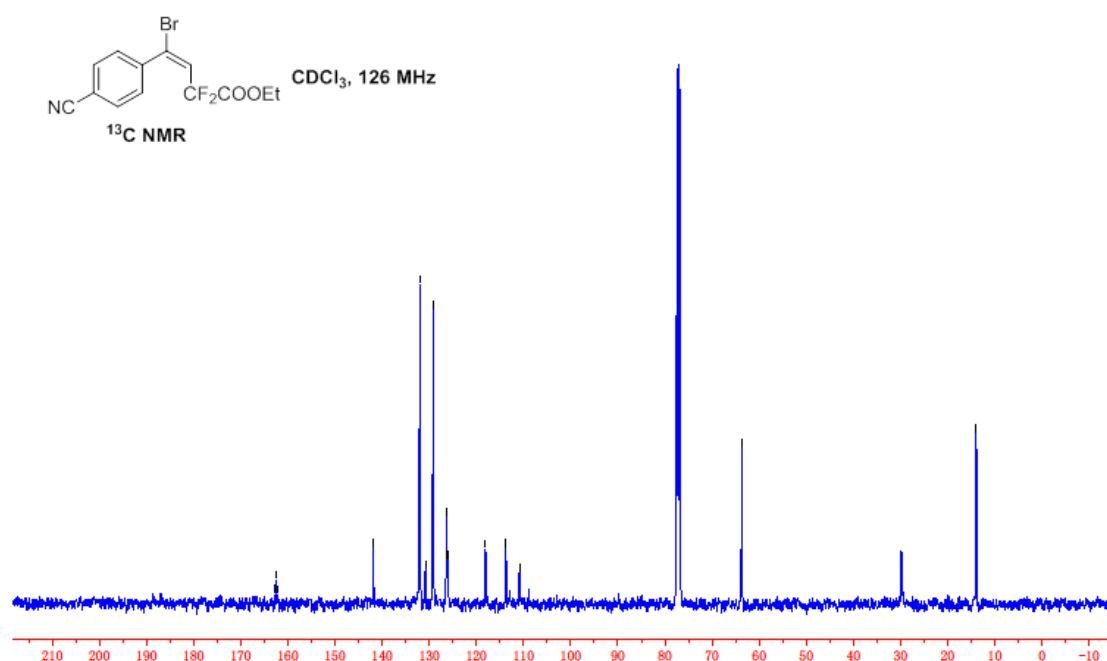

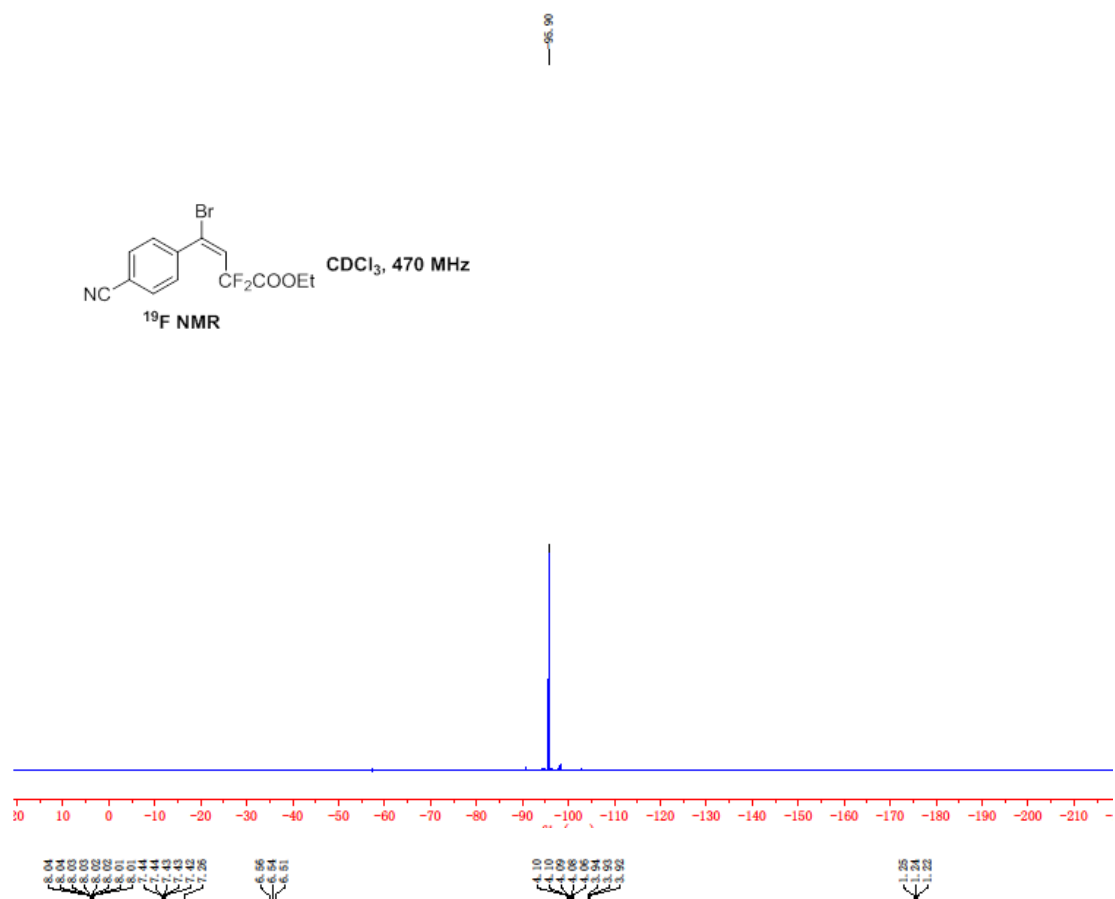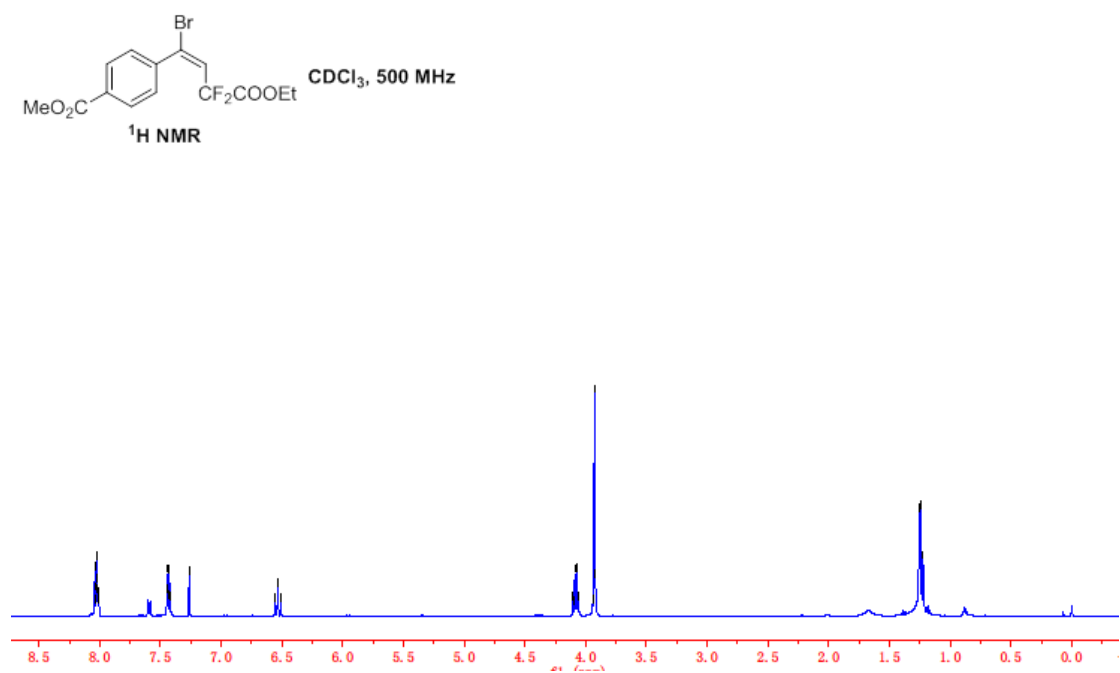

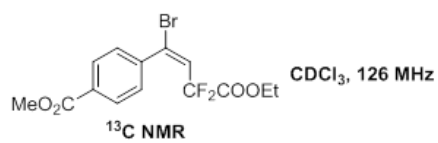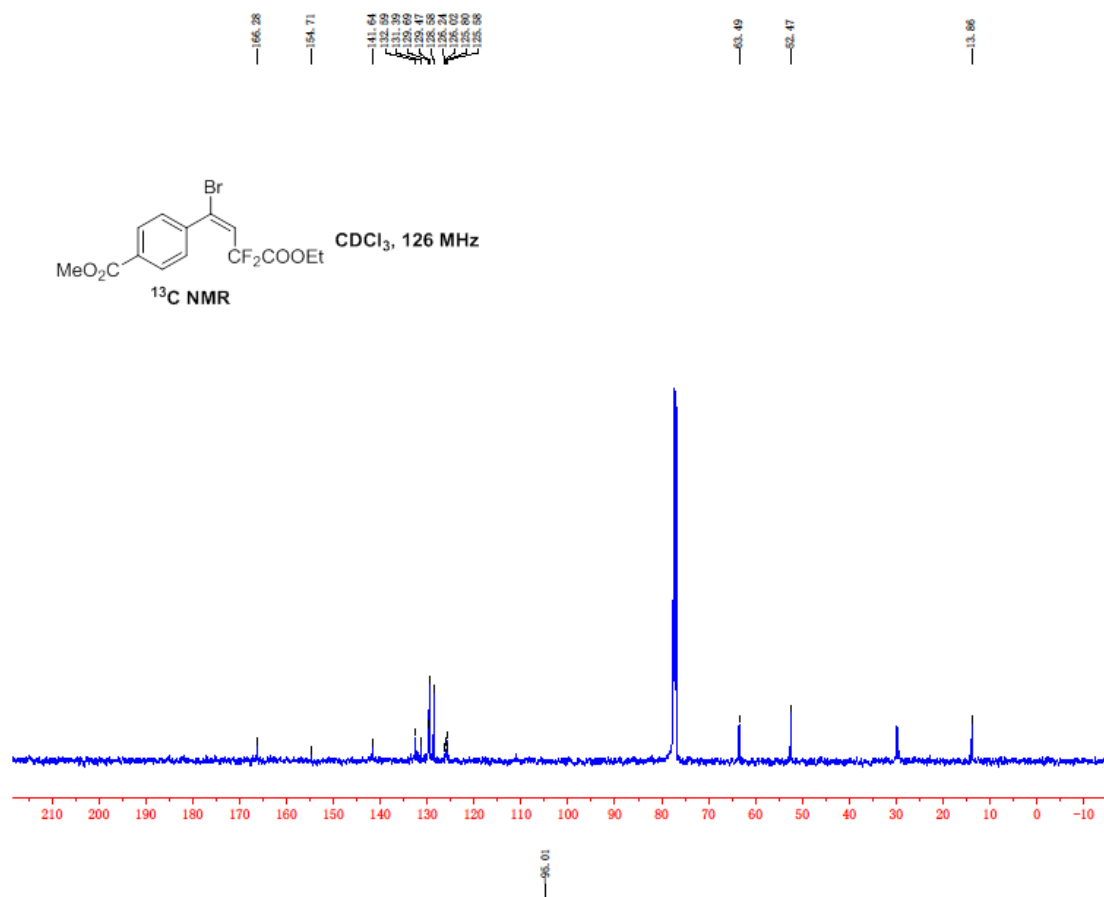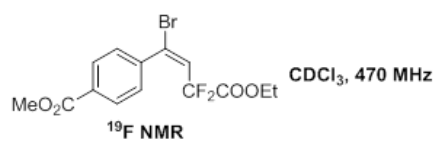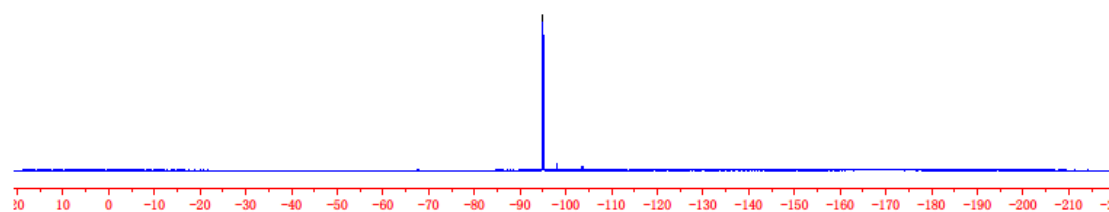

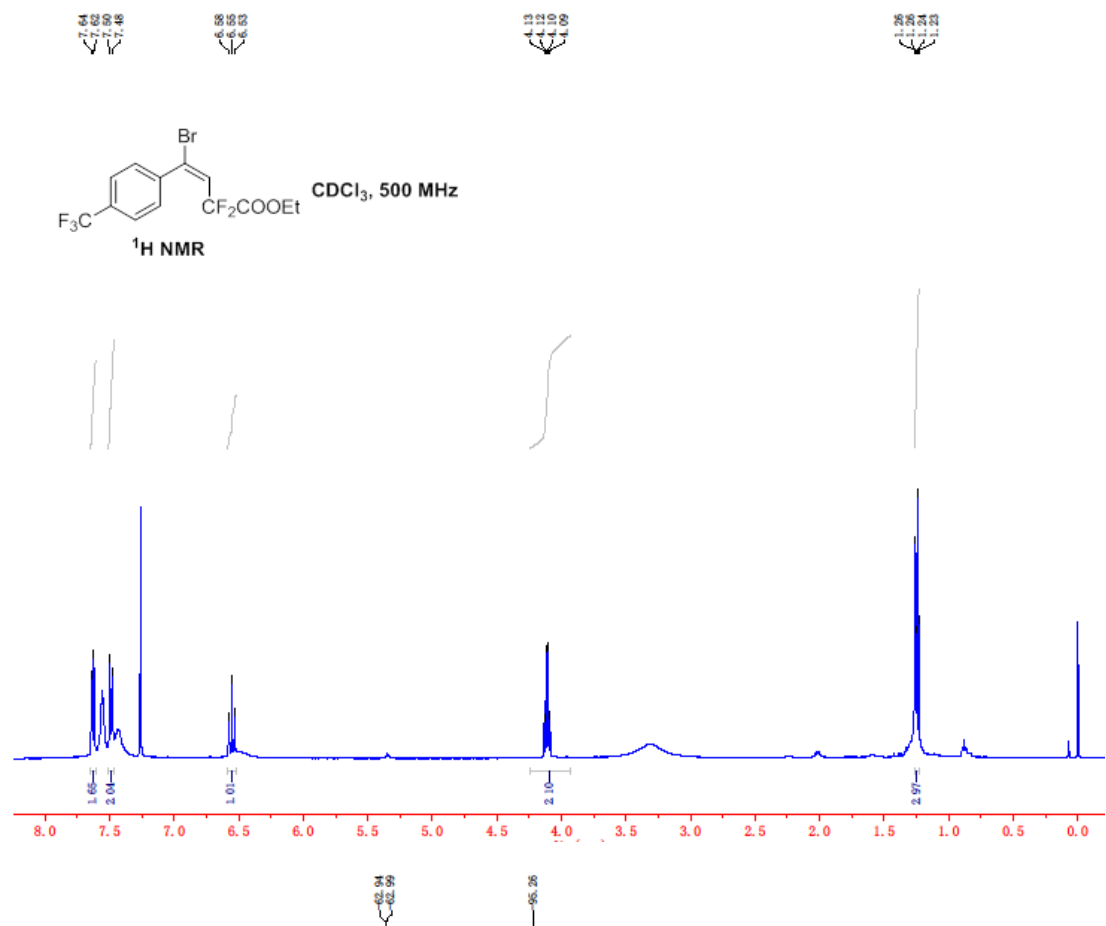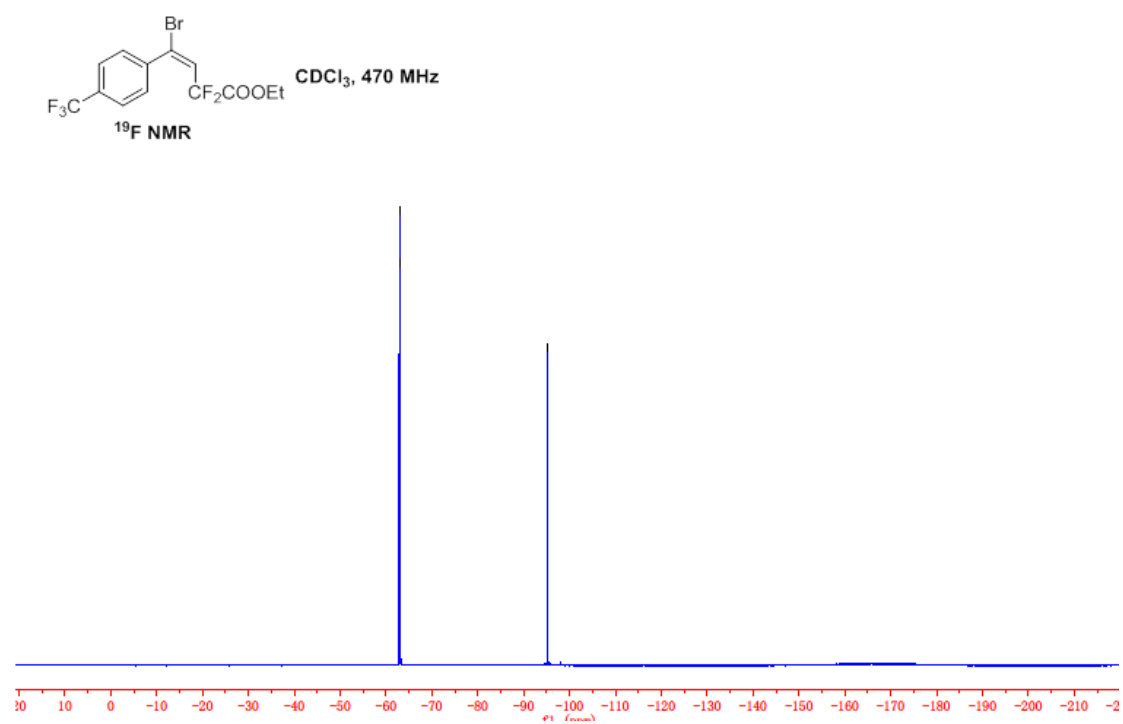

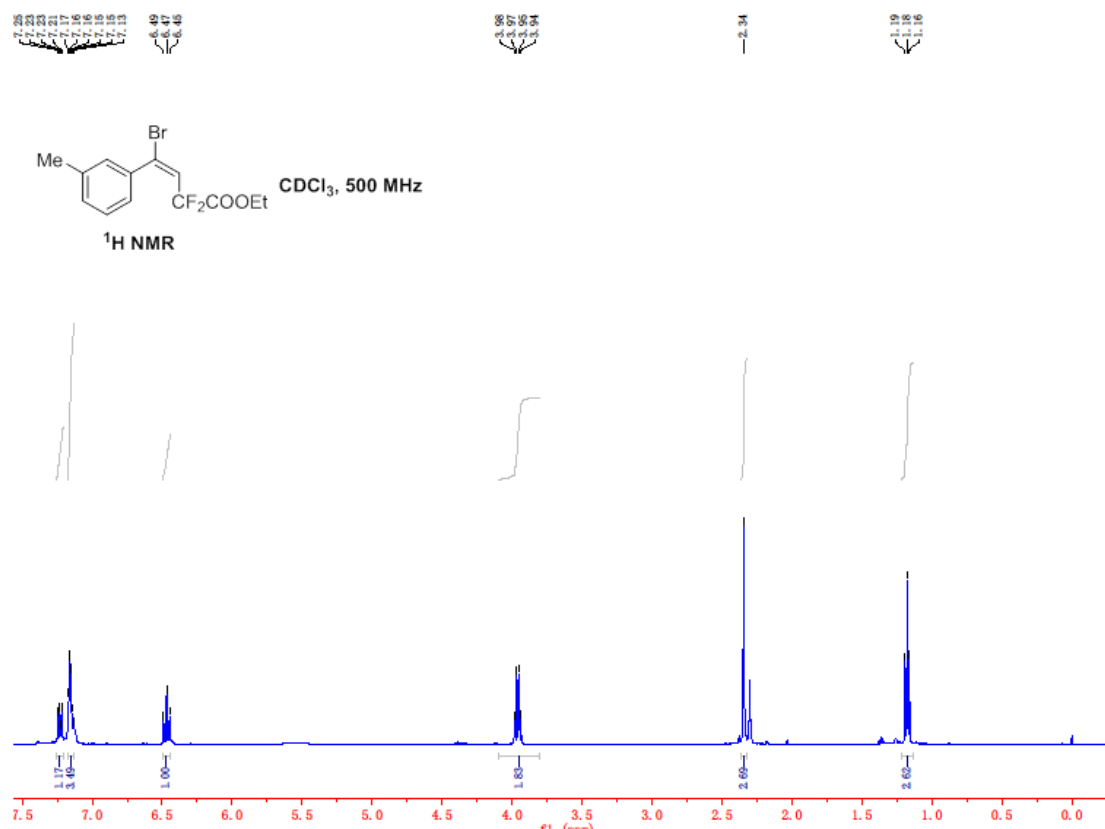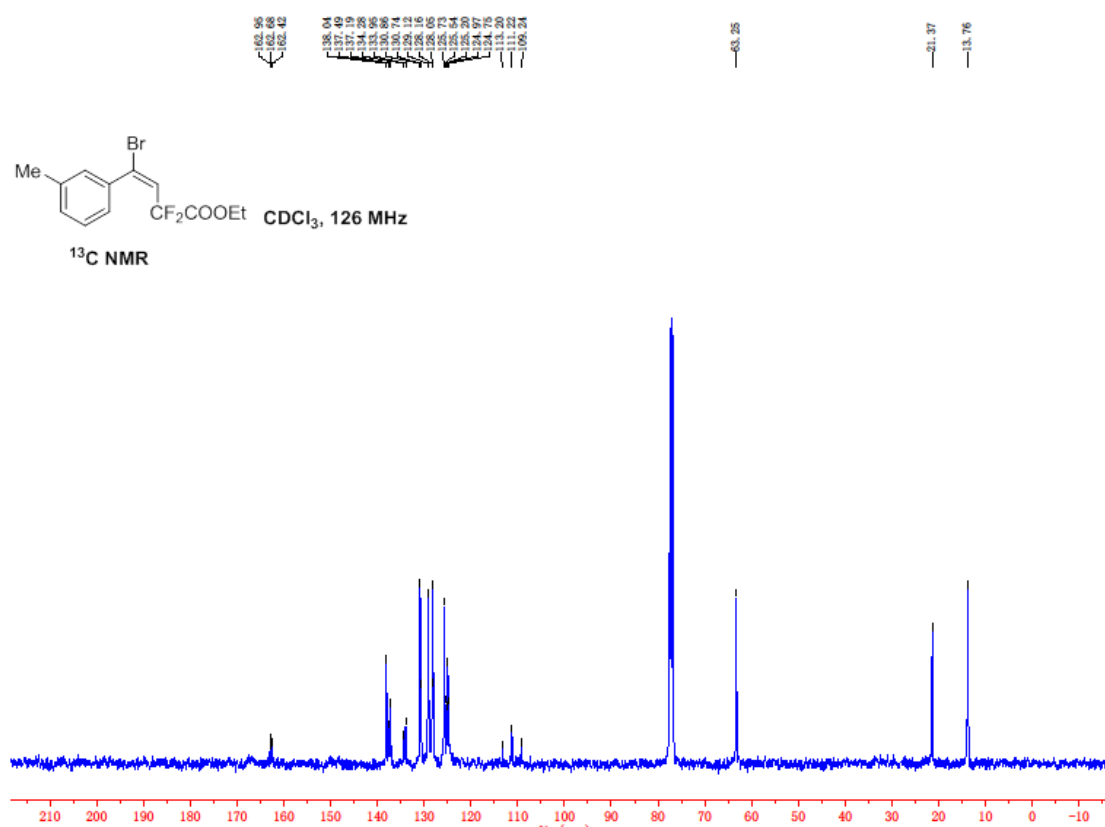

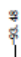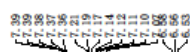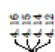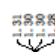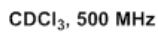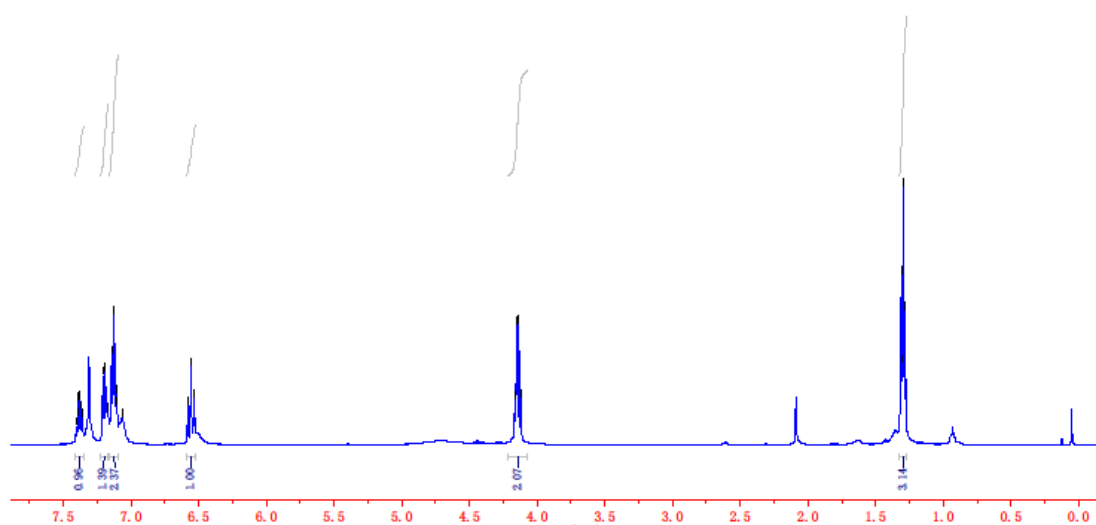

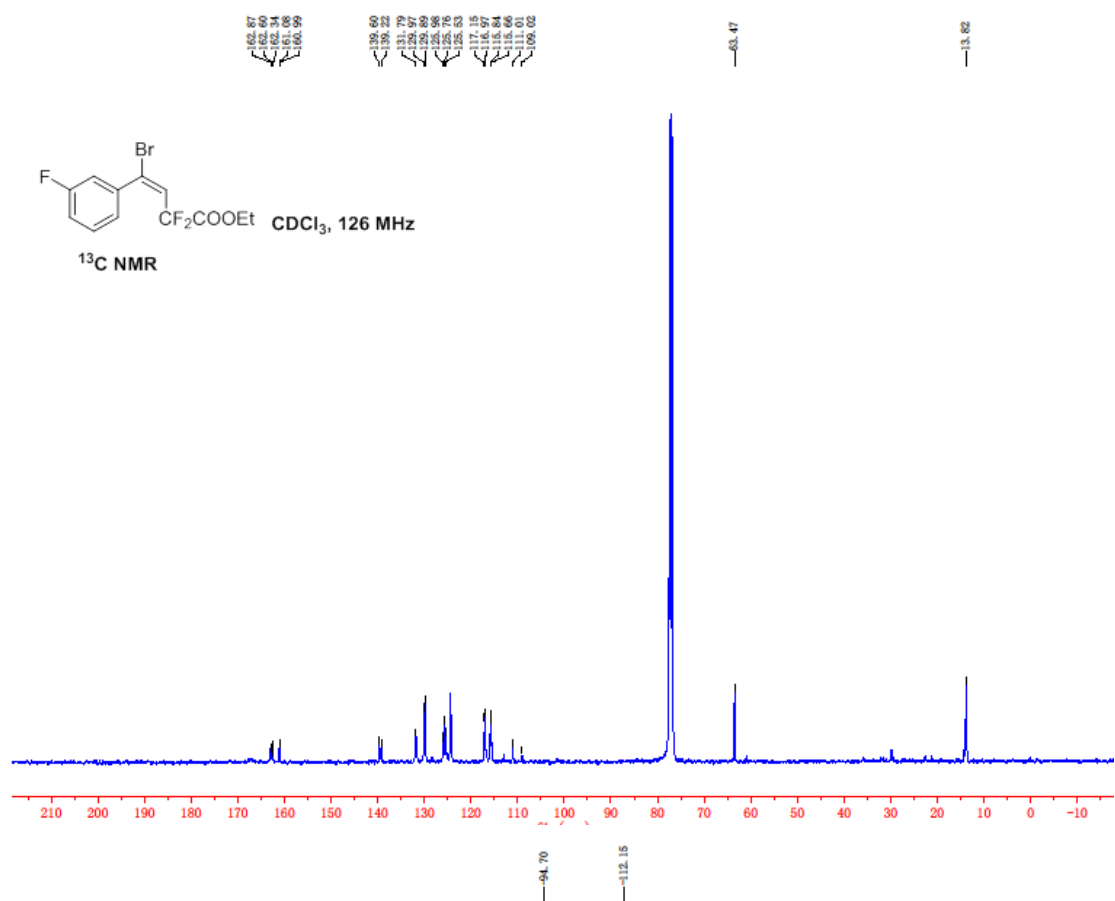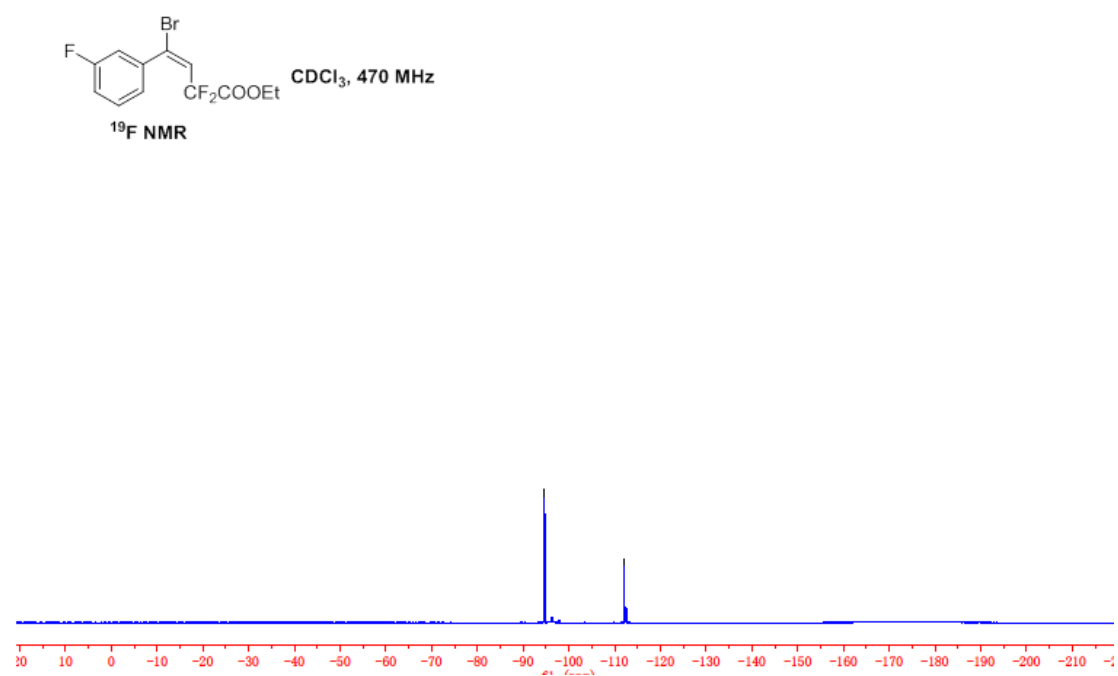



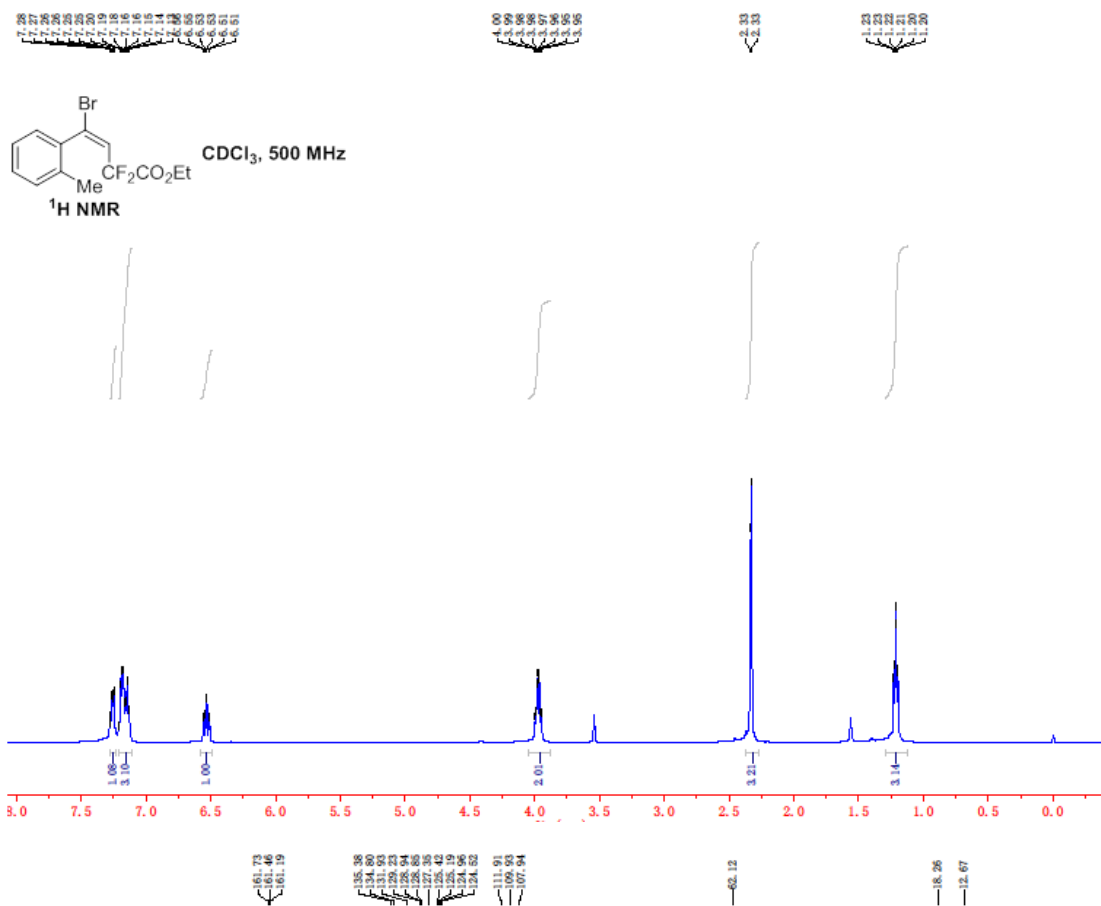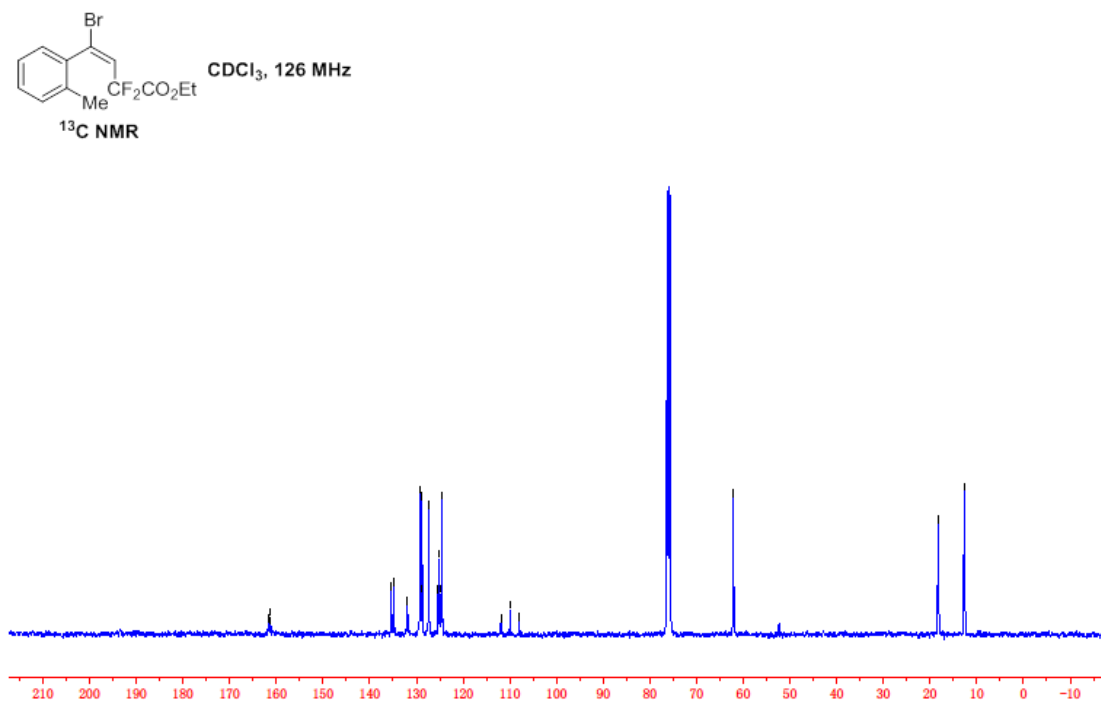

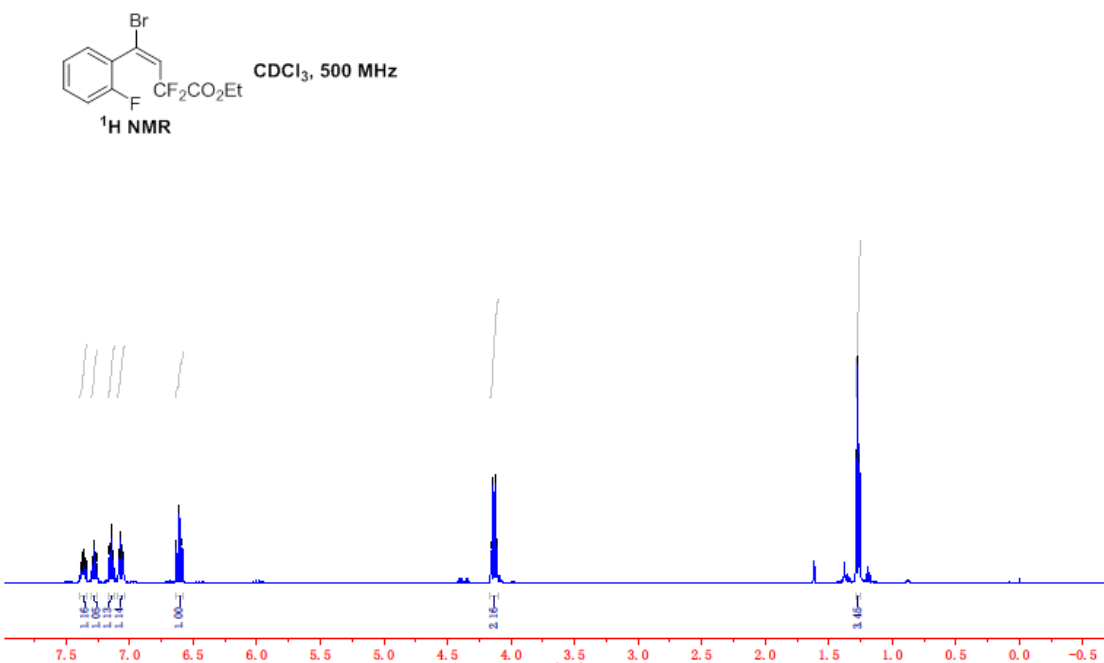

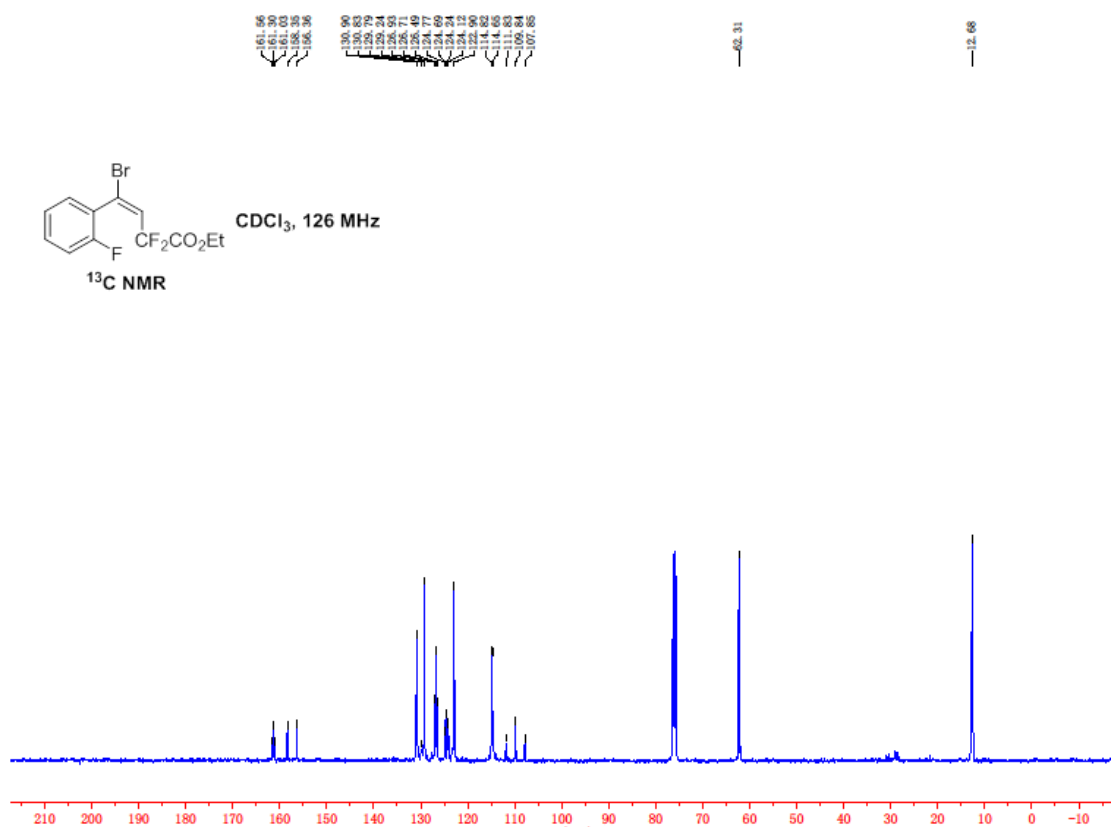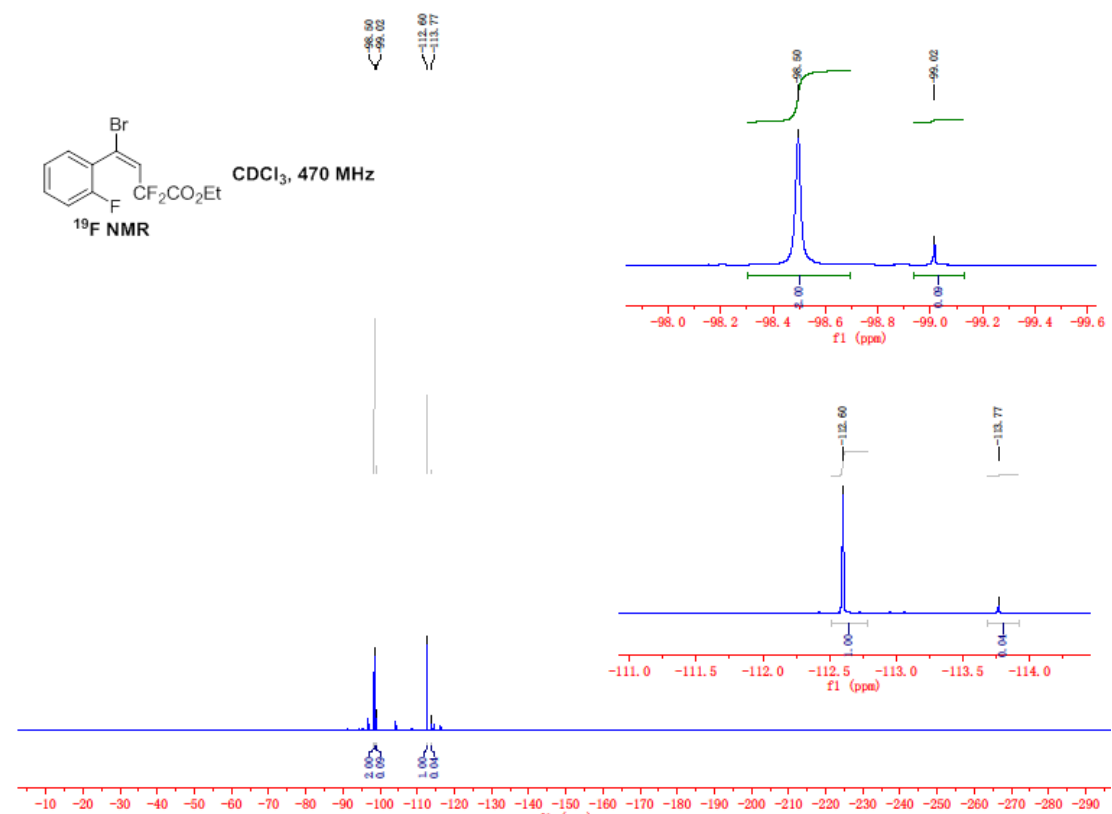

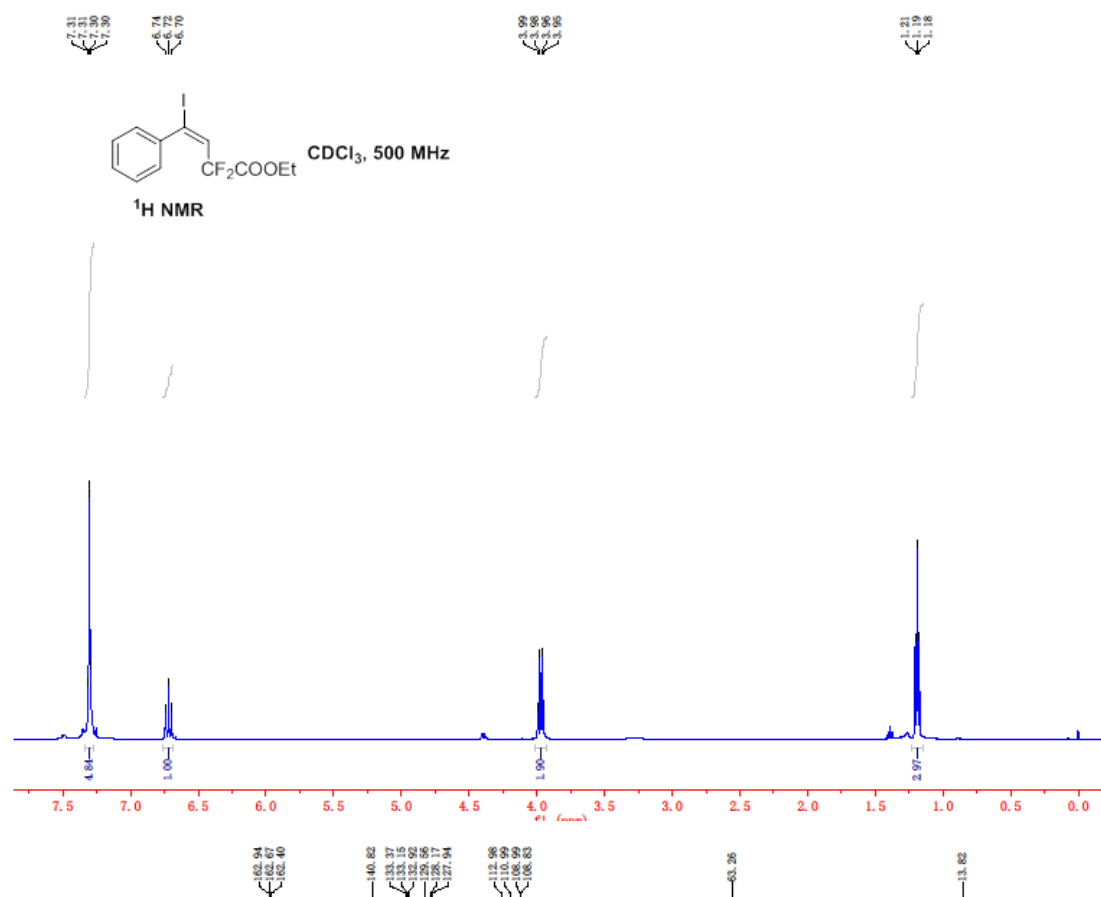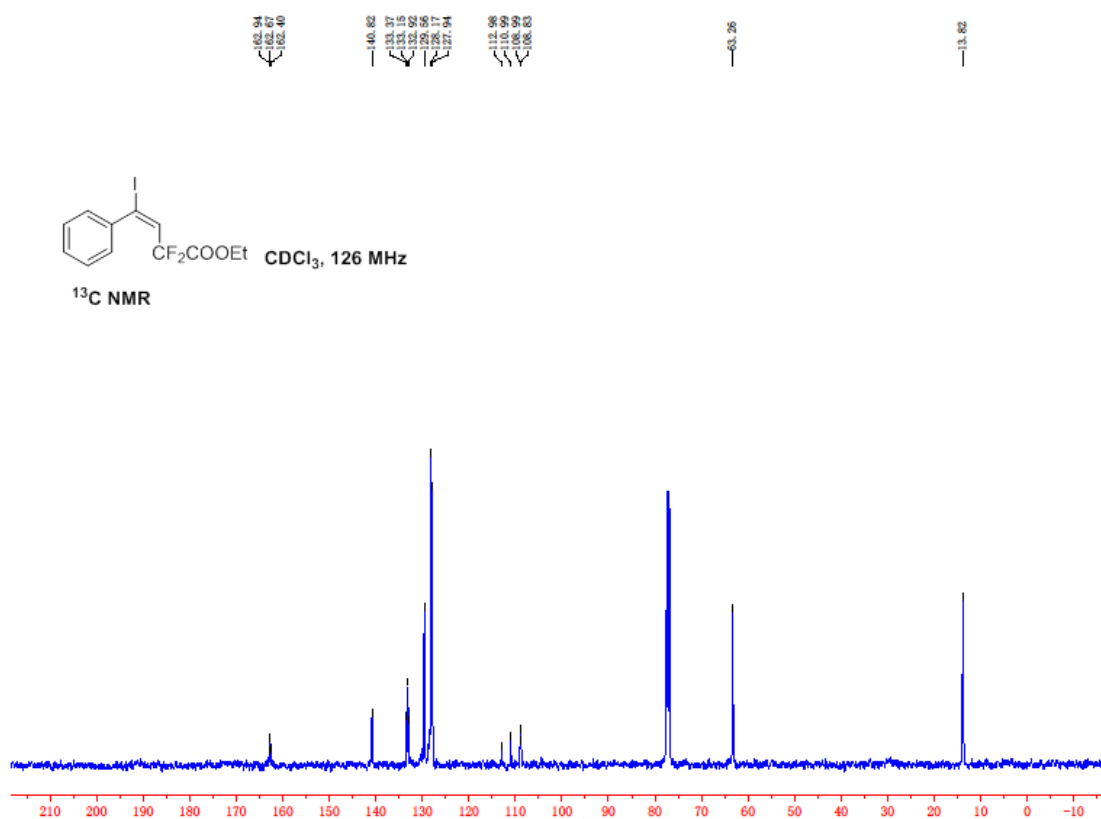

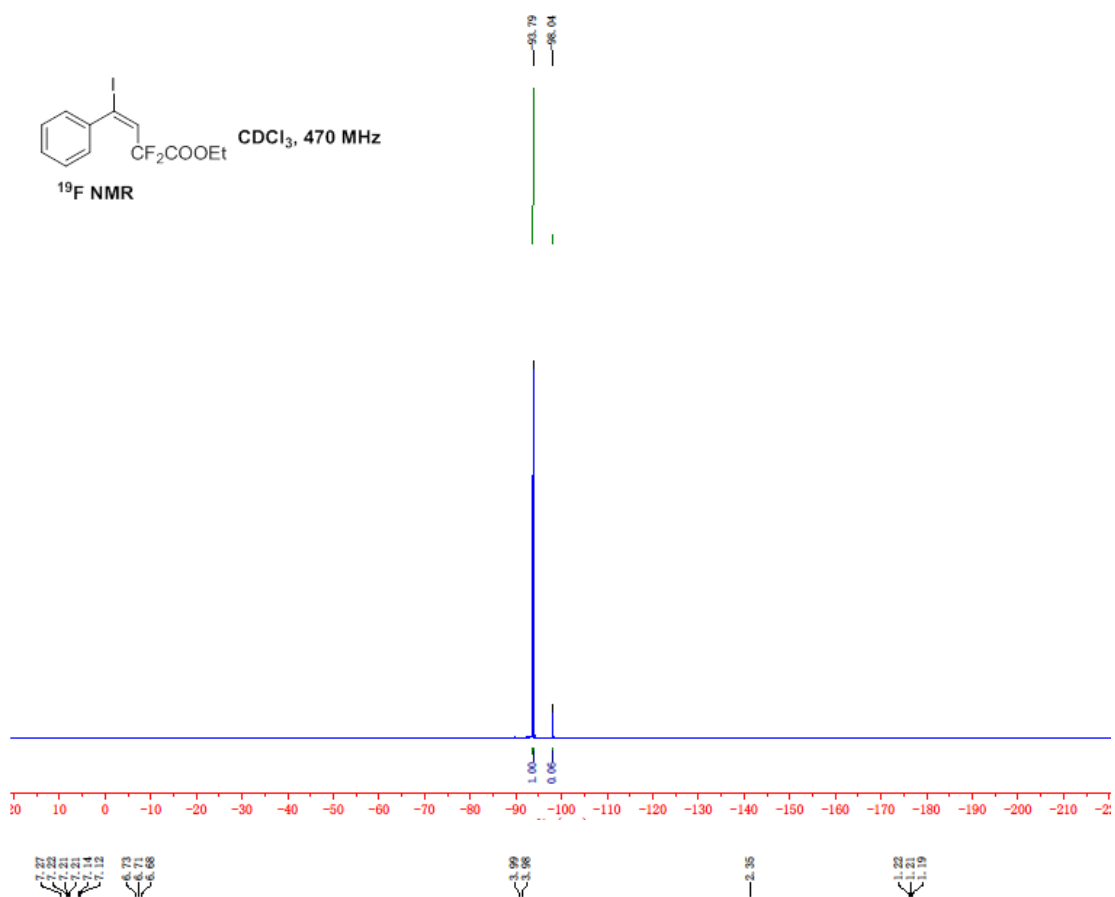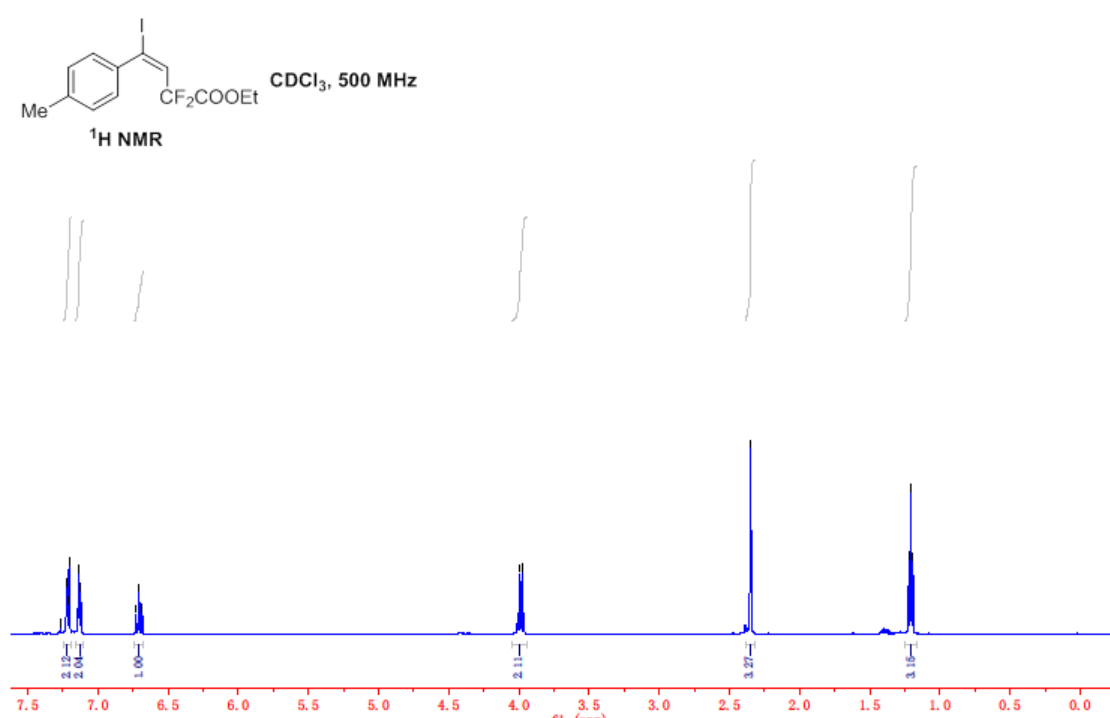

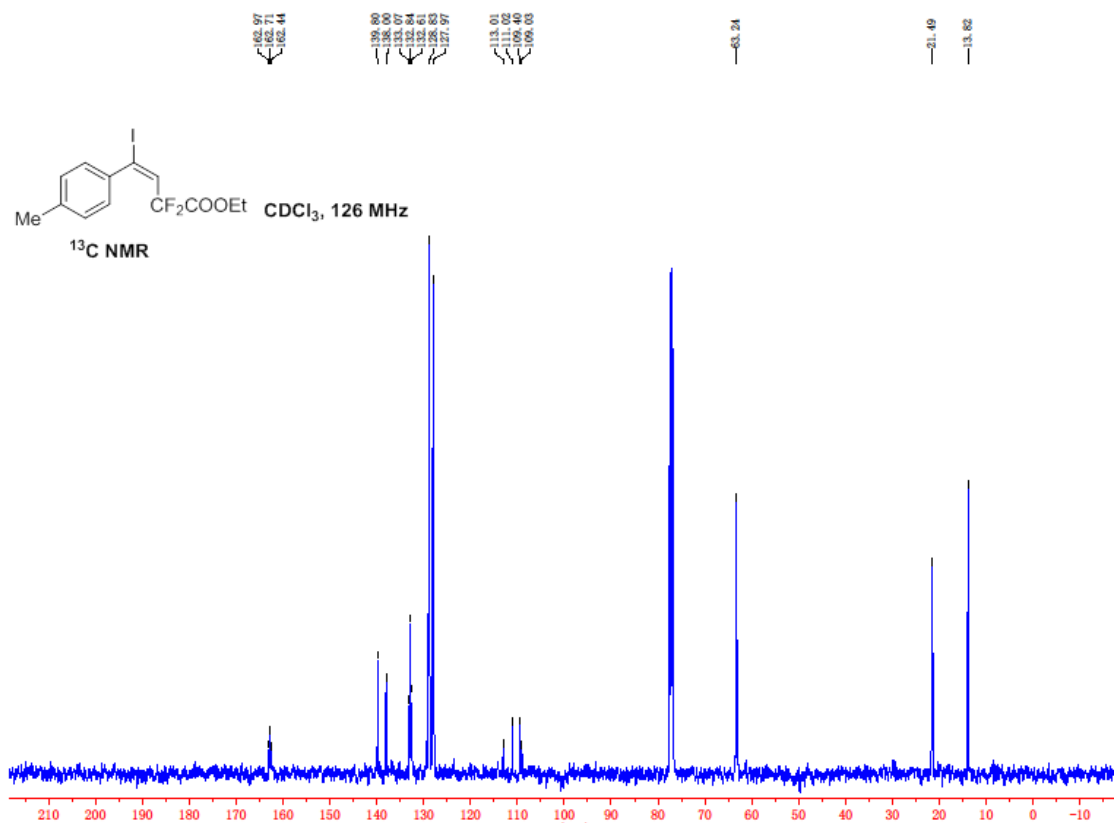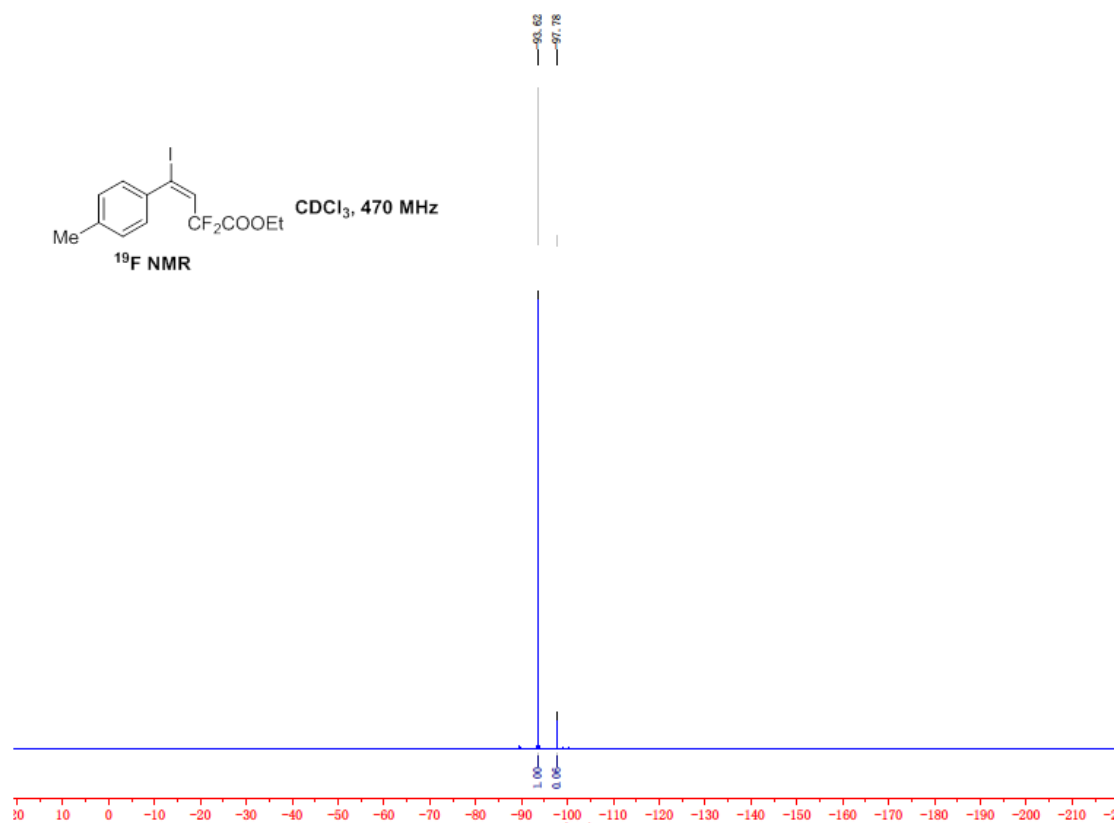



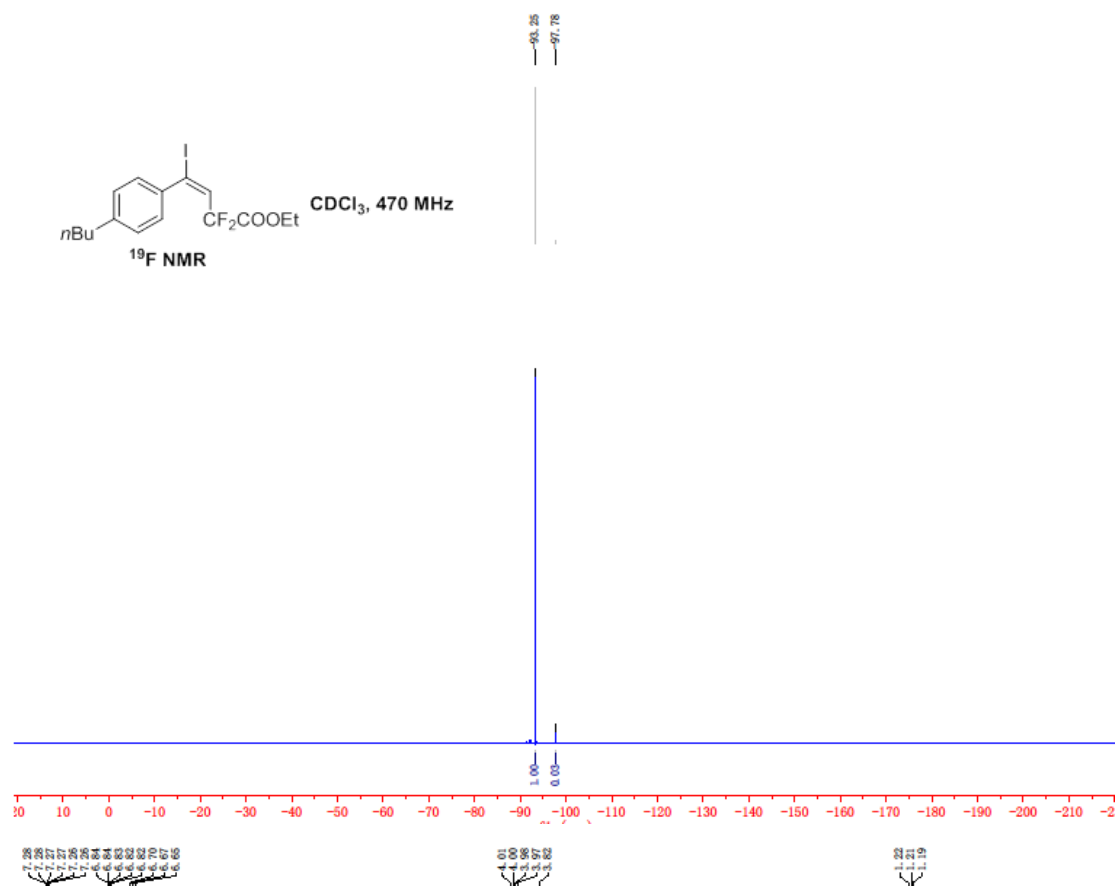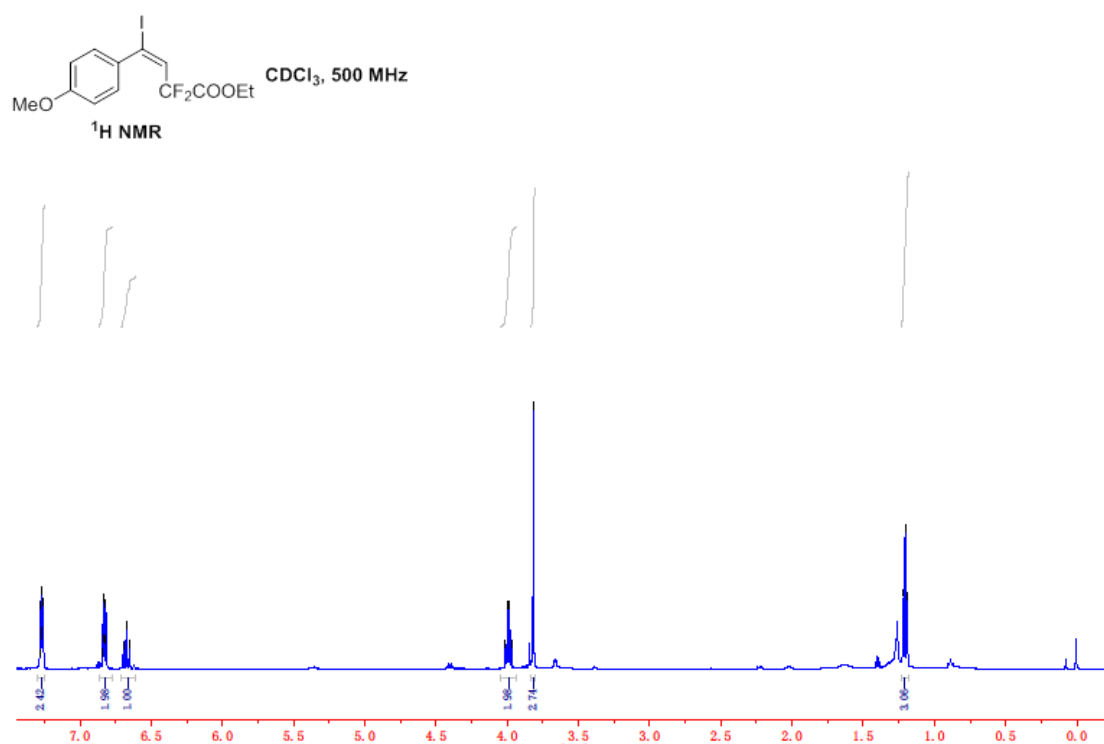



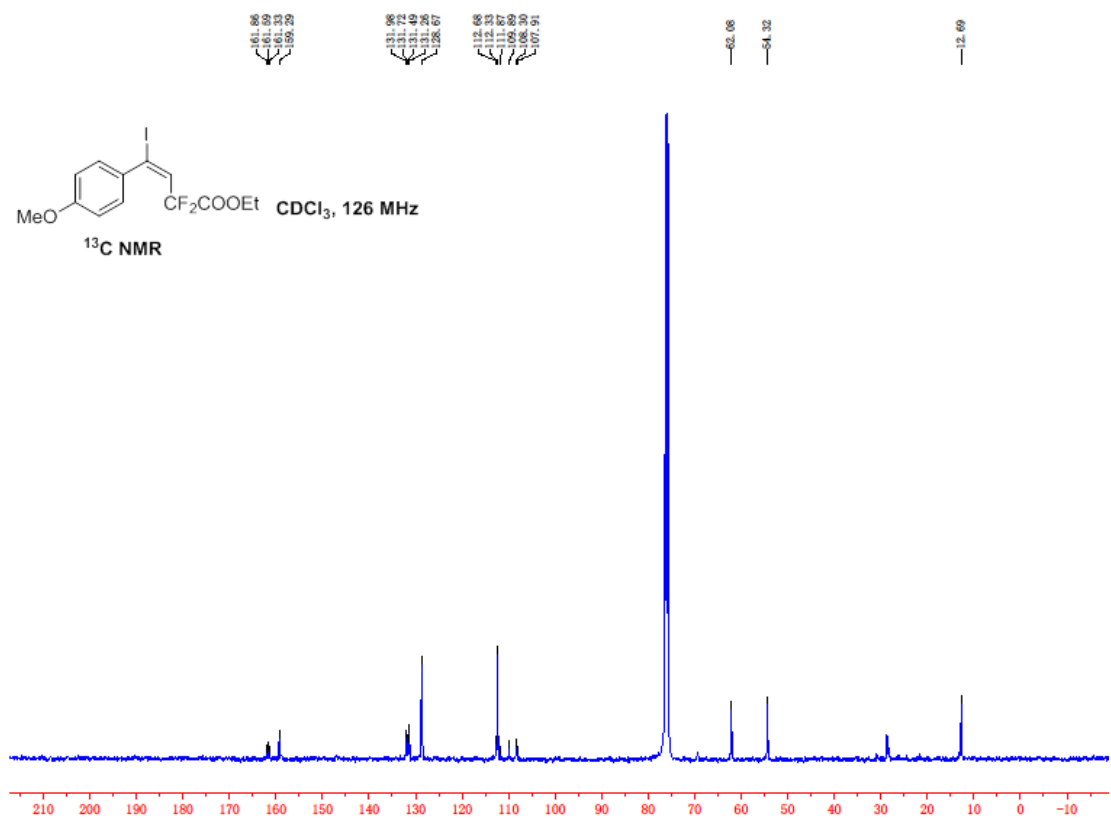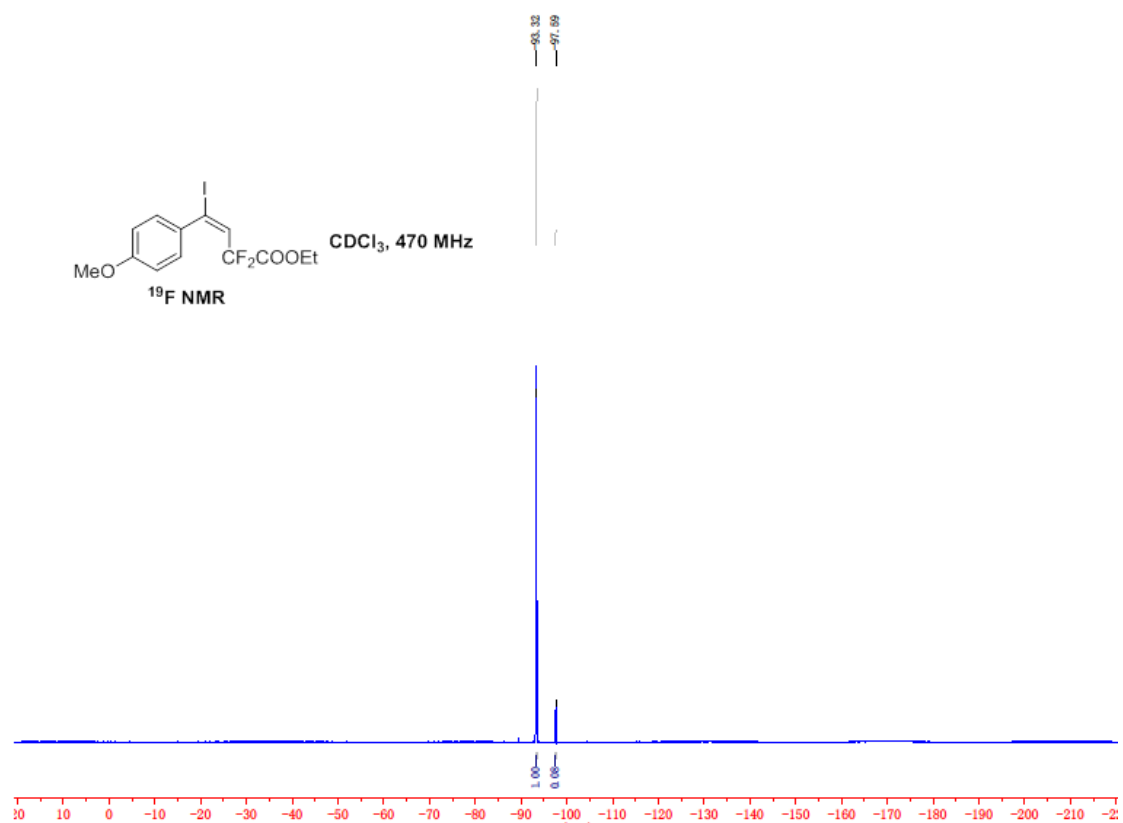

7.30, 7.29, 7.03, 7.00, 6.99, 6.73, 6.71, 6.68

4.00, 3.99, 3.98

1.33, 1.32, 1.31

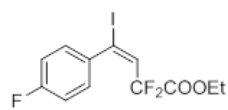

CDCl<sub>3</sub>, 500 MHz

<sup>1</sup>H NMR

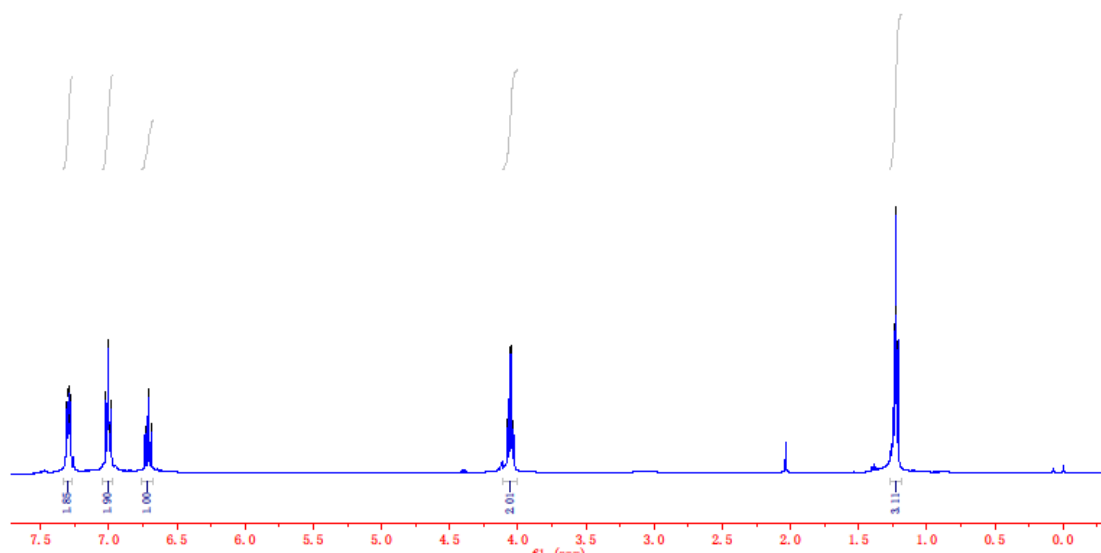

164.00, 162.04, 162.00

136.97, 133.74, 133.62, 133.30, 130.07, 130.00

115.37, 115.19, 112.96, 110.87, 108.69, 107.44

-63.39

-13.85

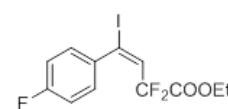

CDCl<sub>3</sub>, 126 MHz

<sup>13</sup>C NMR

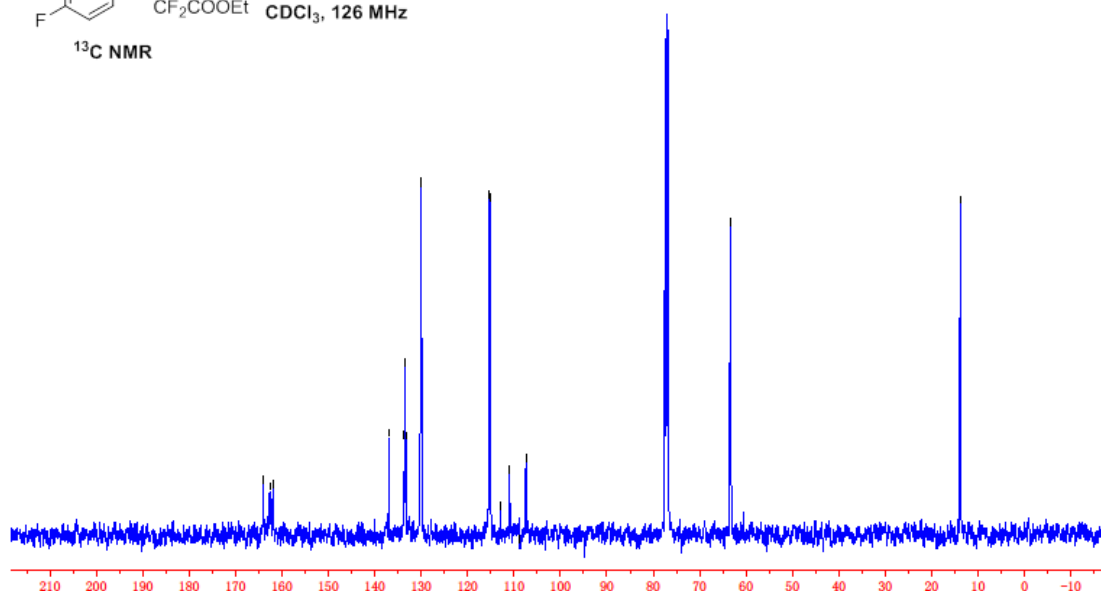

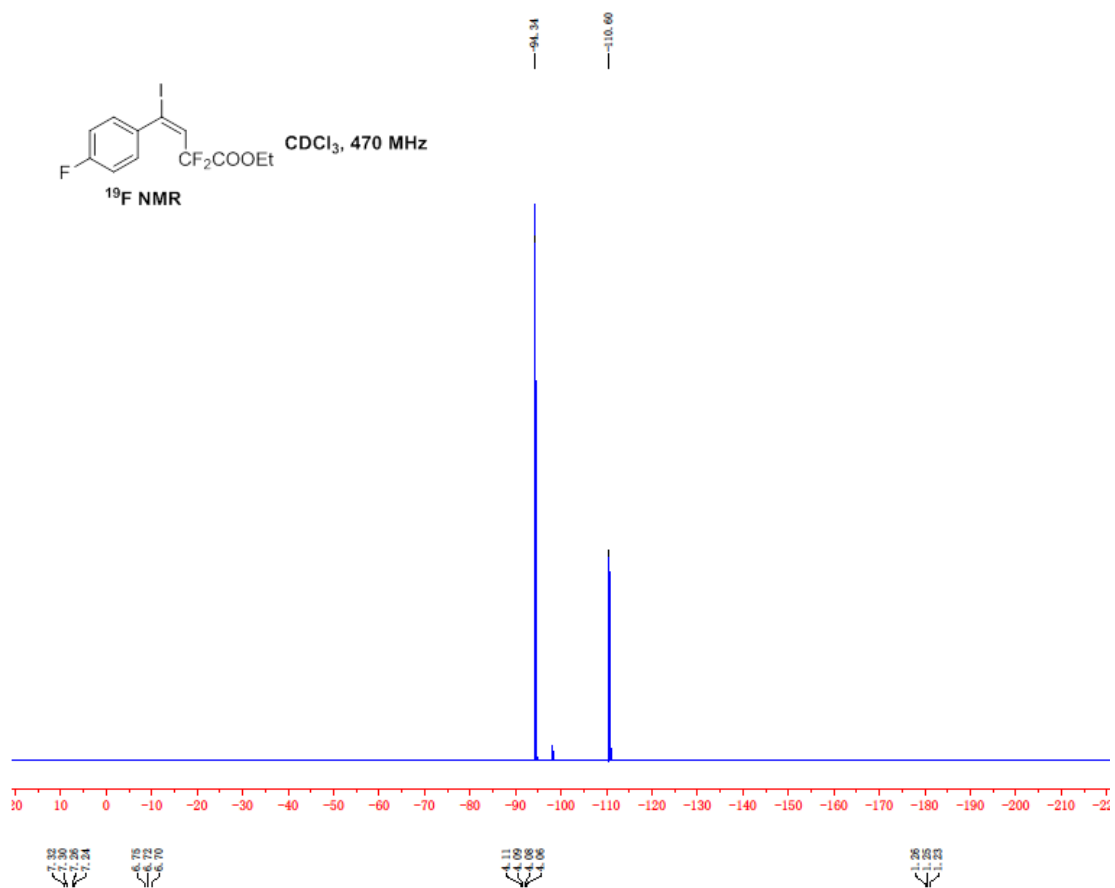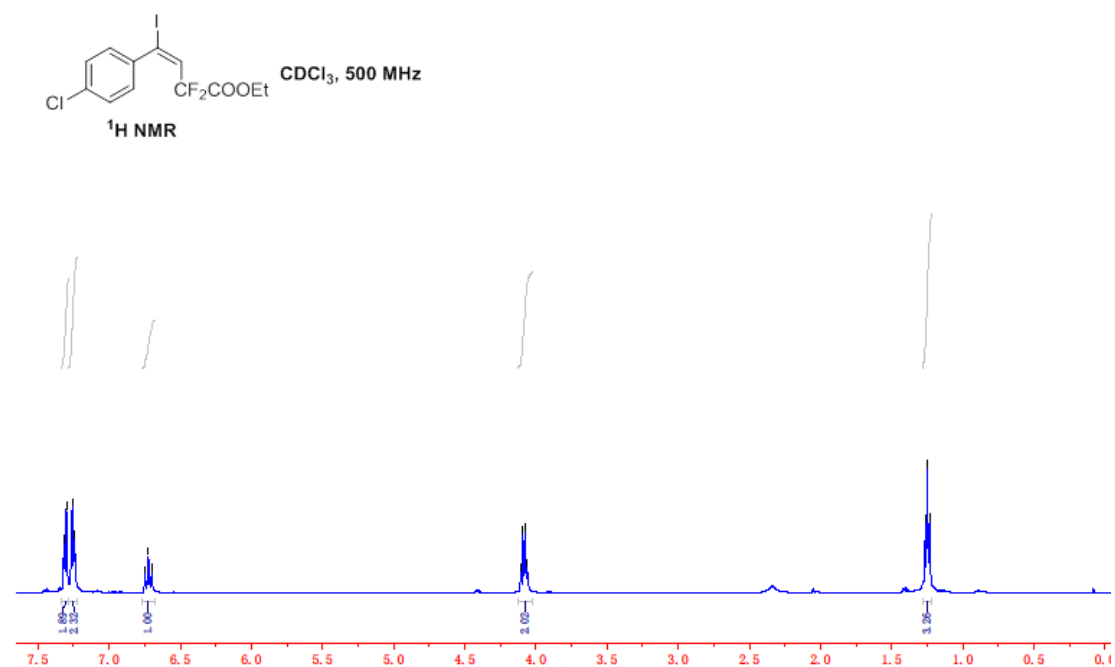

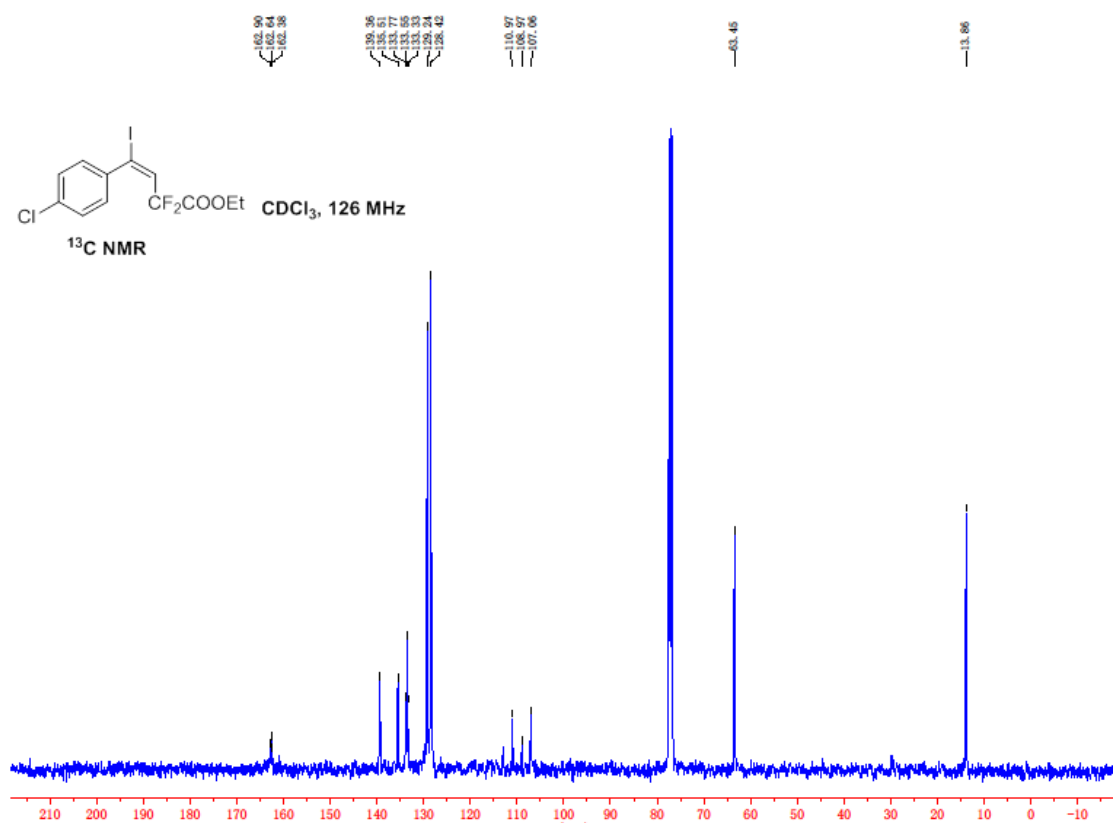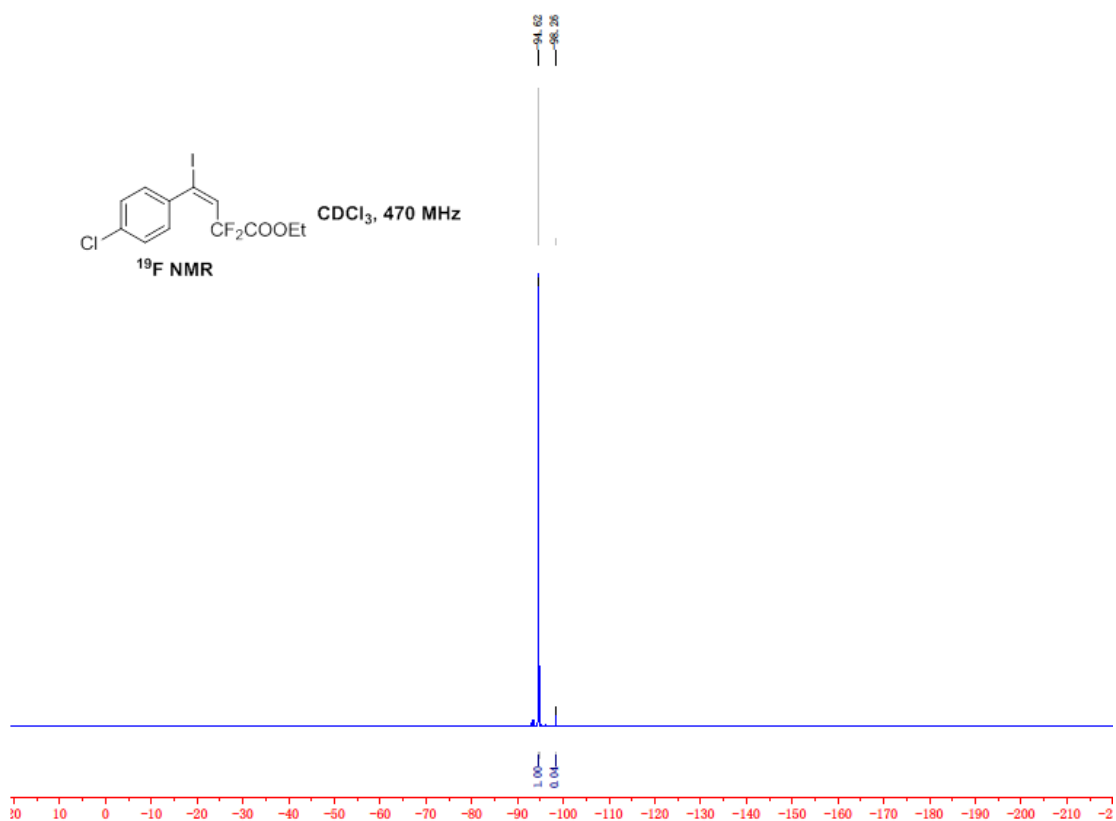



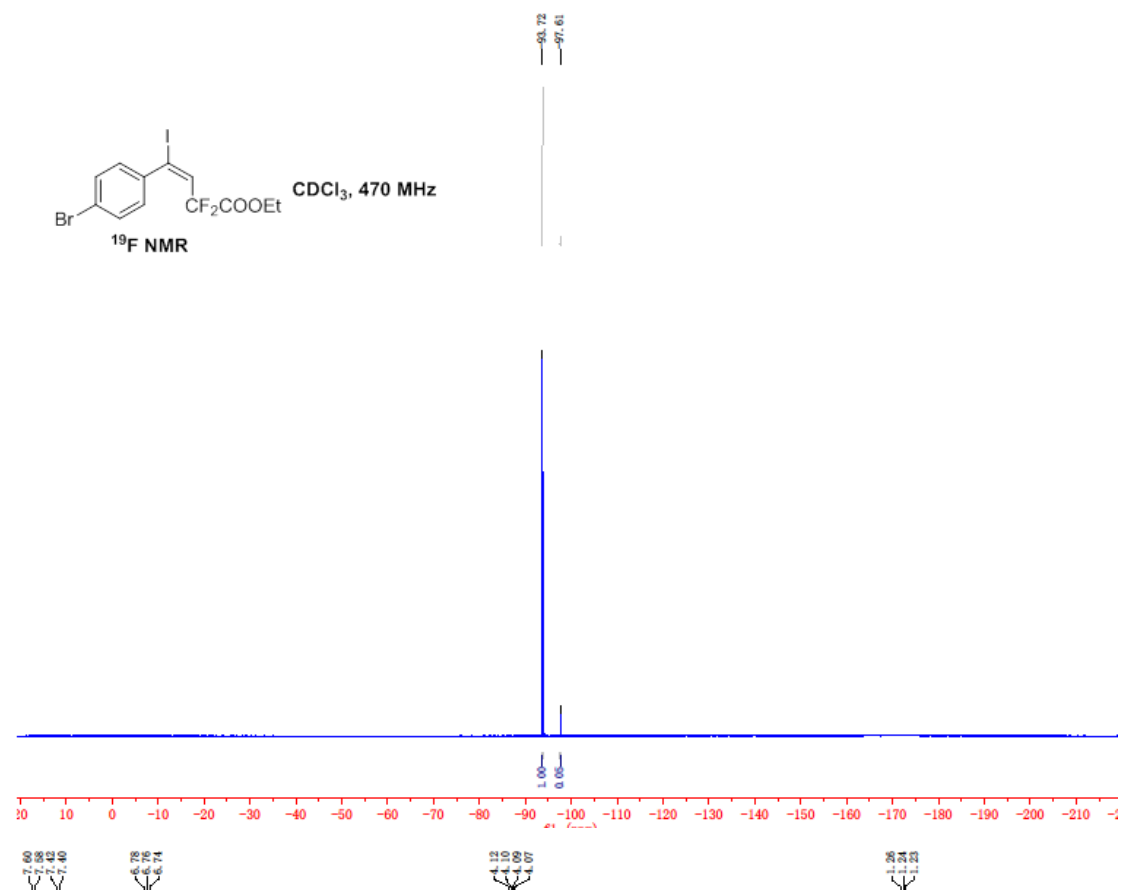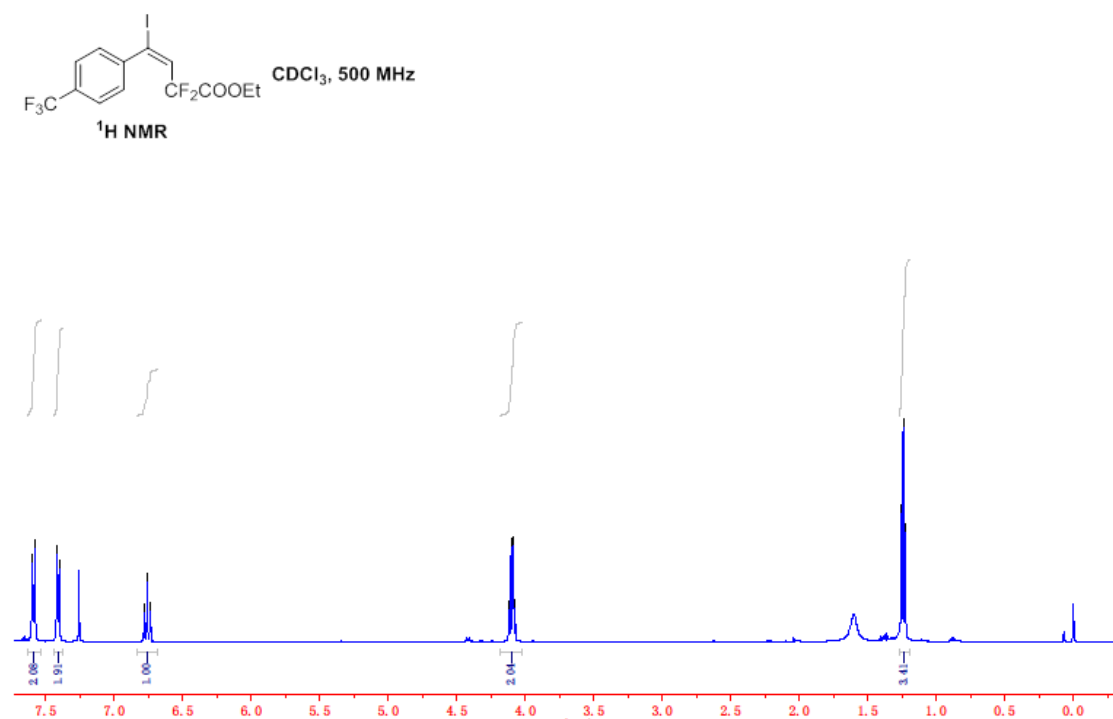

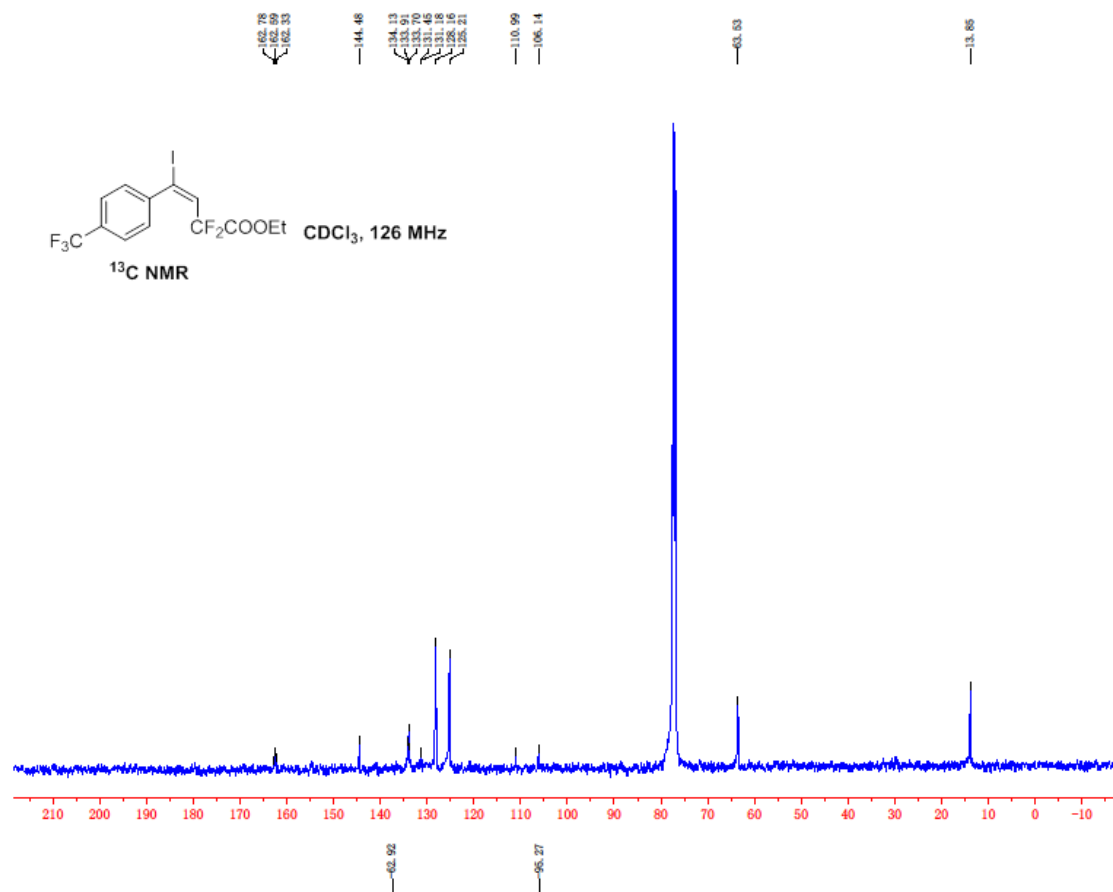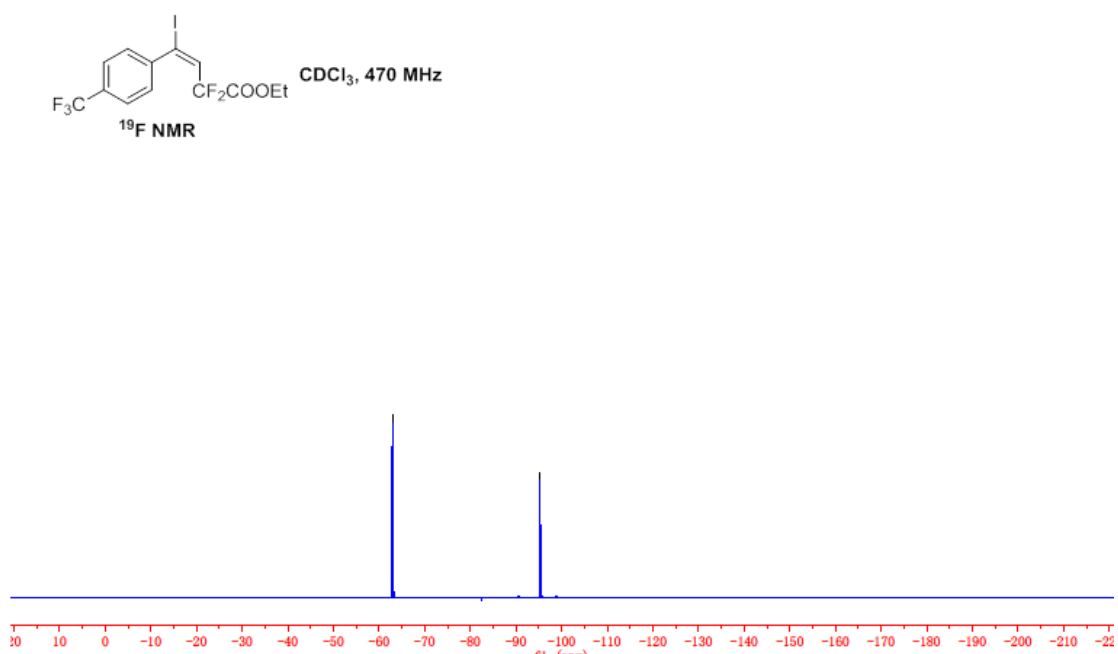

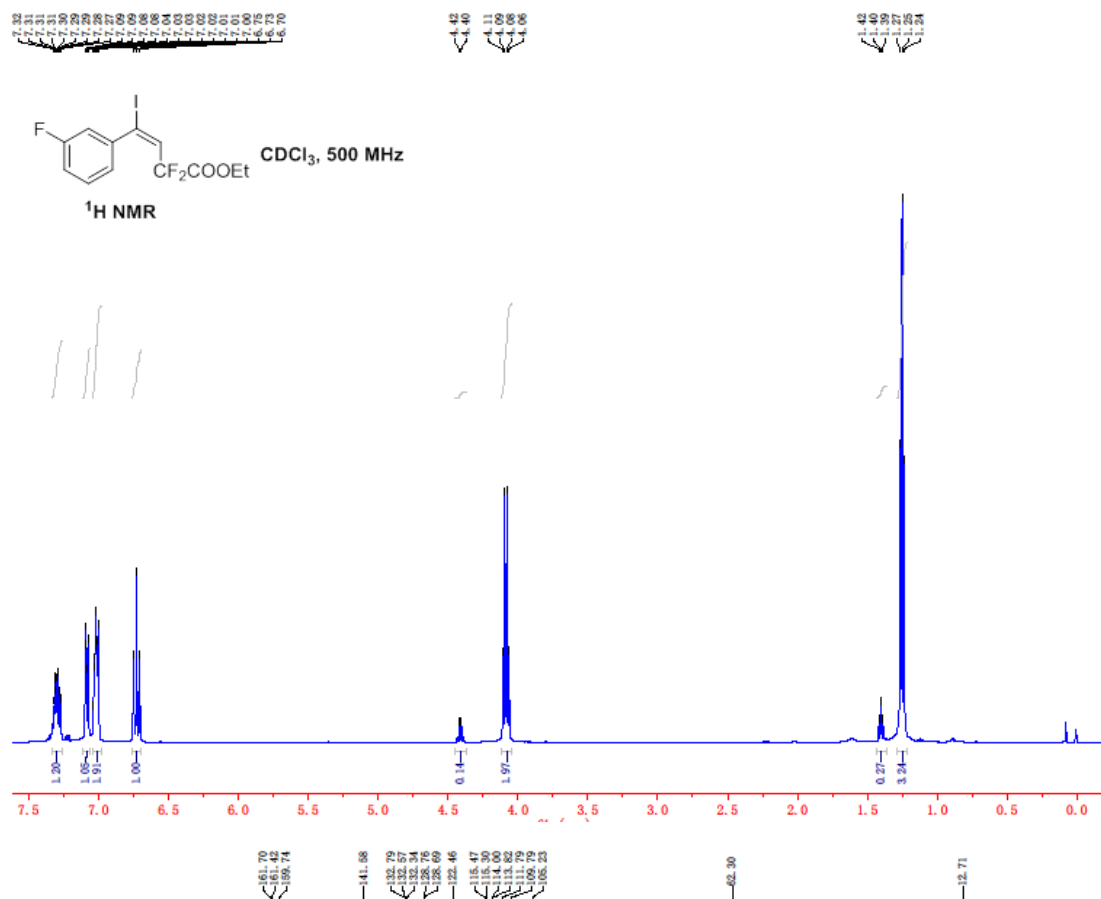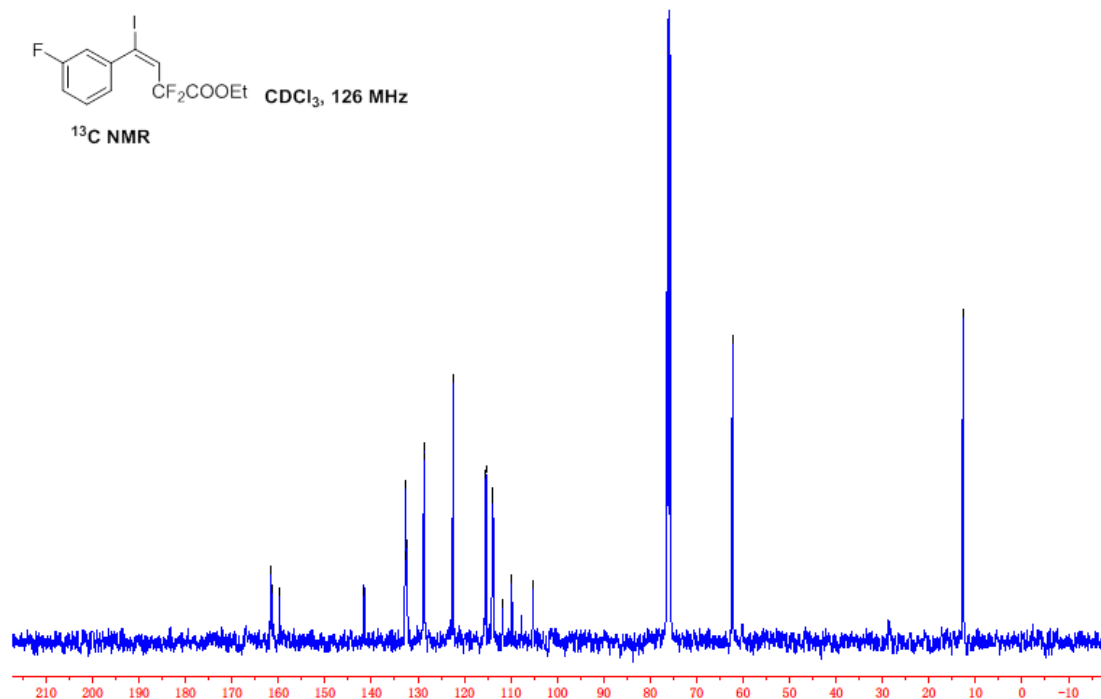



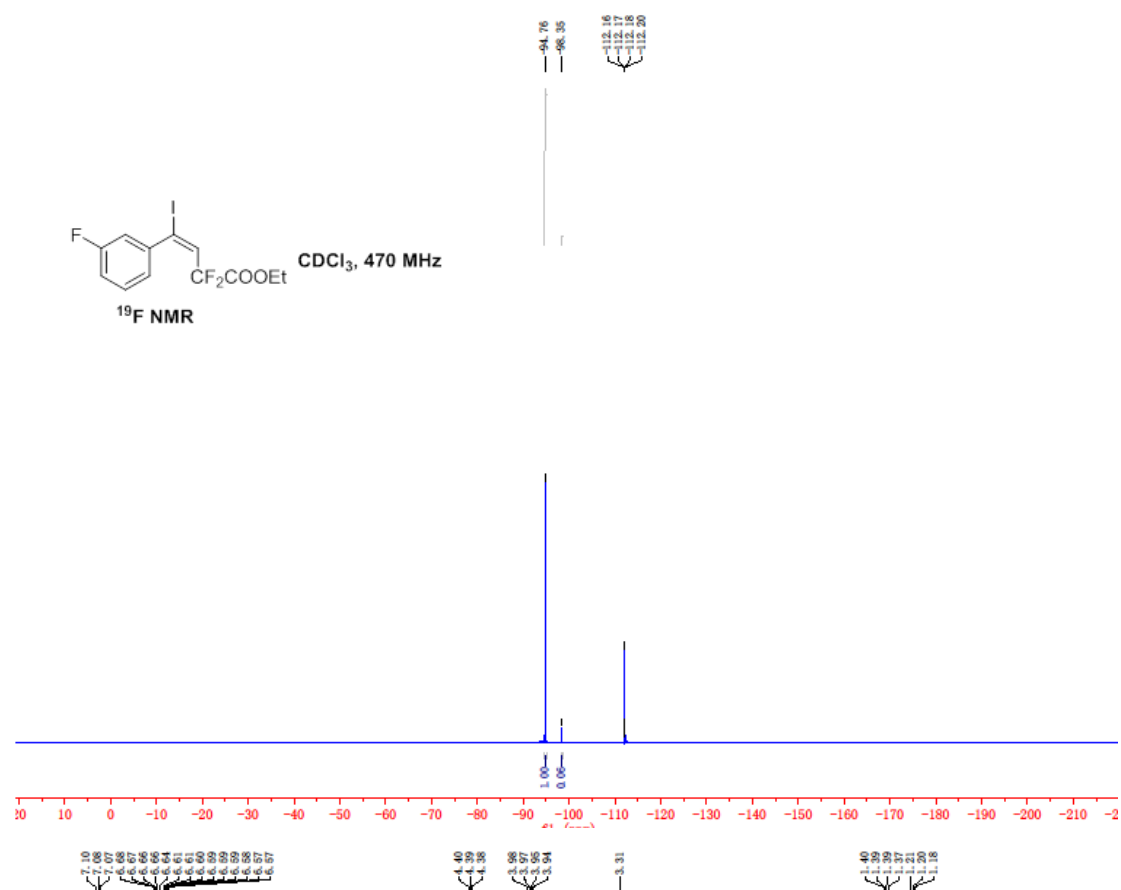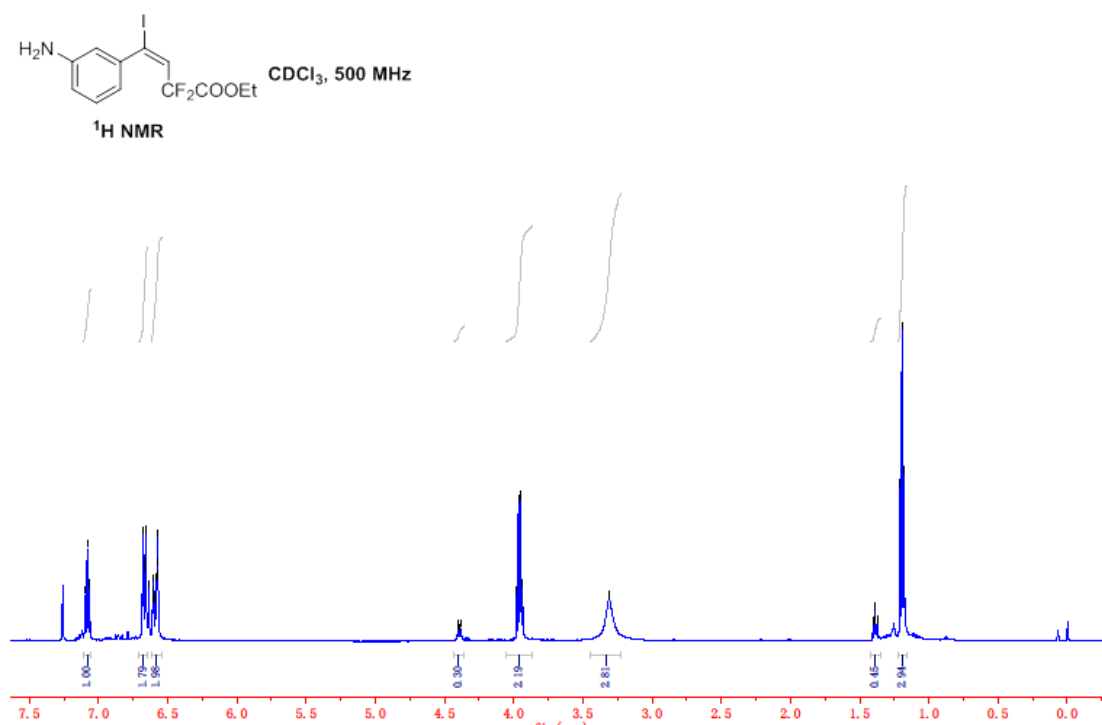

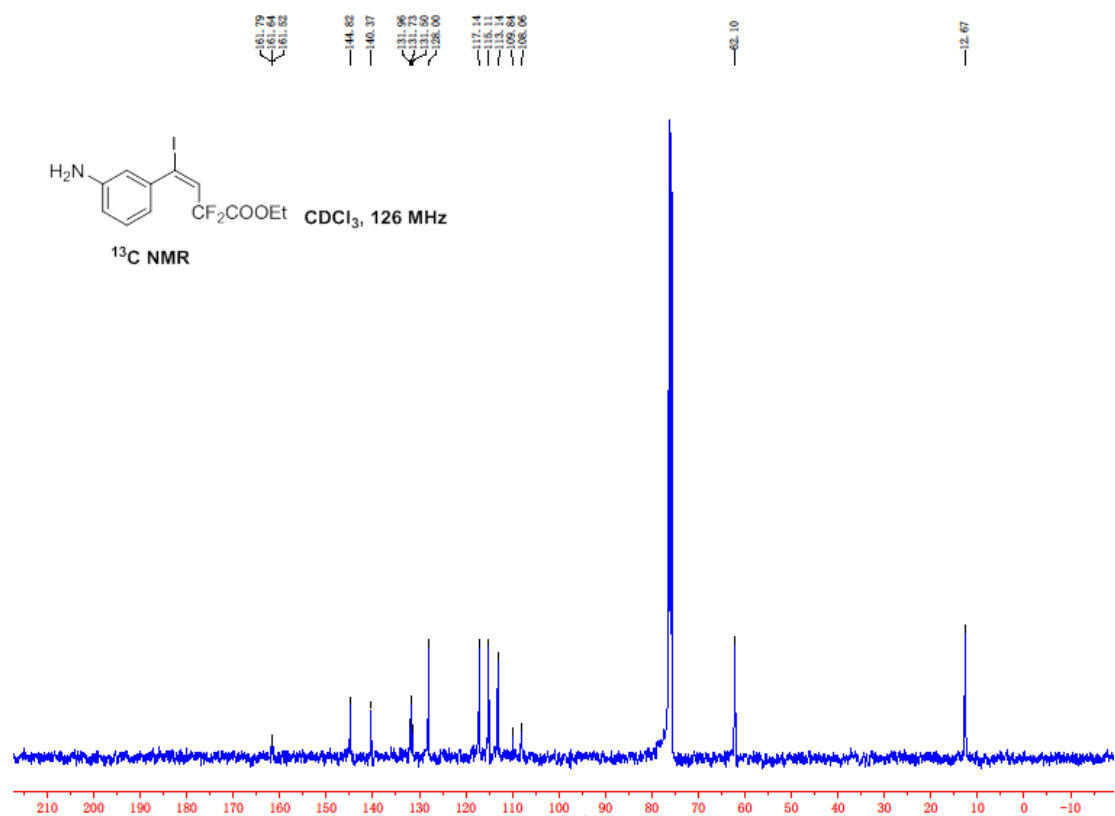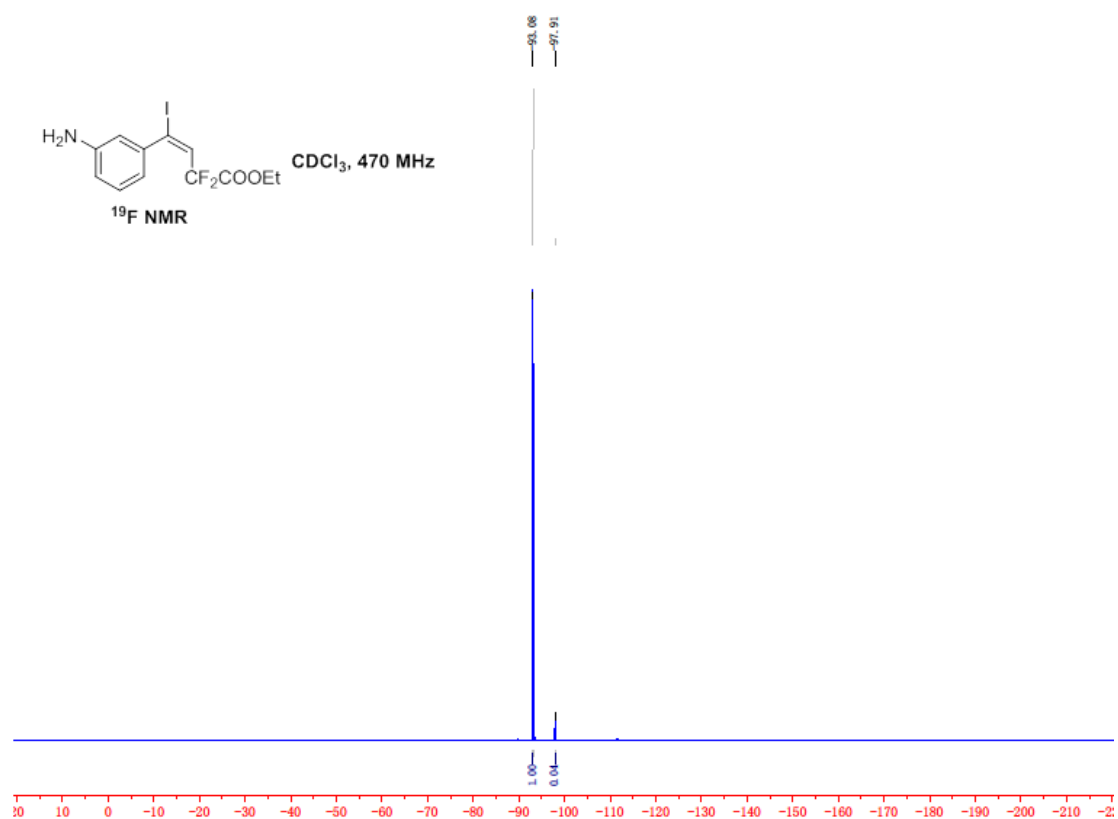



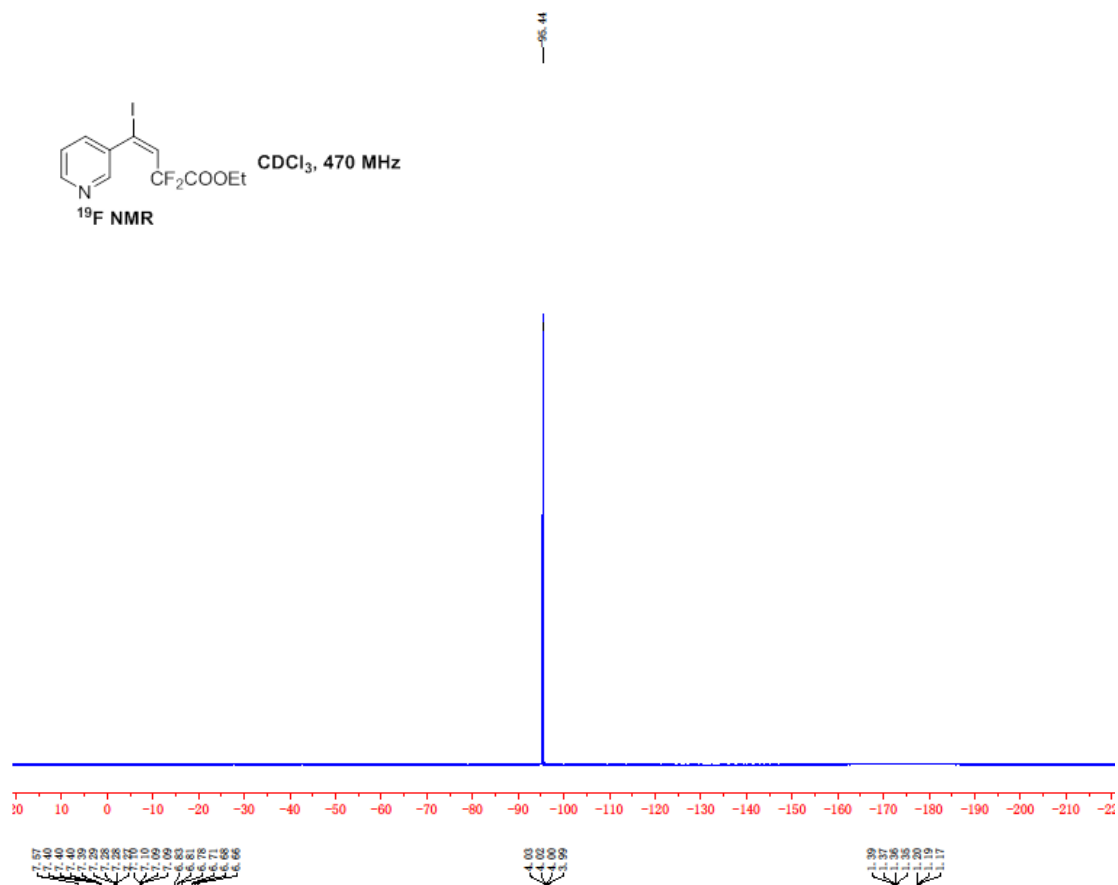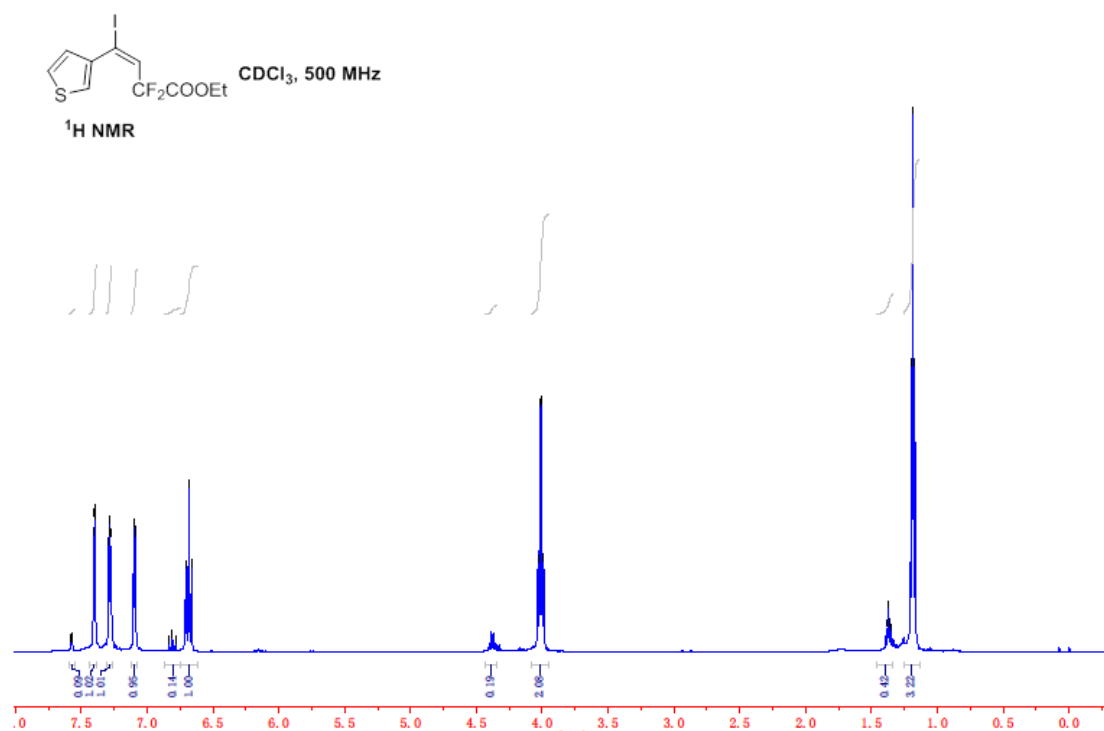

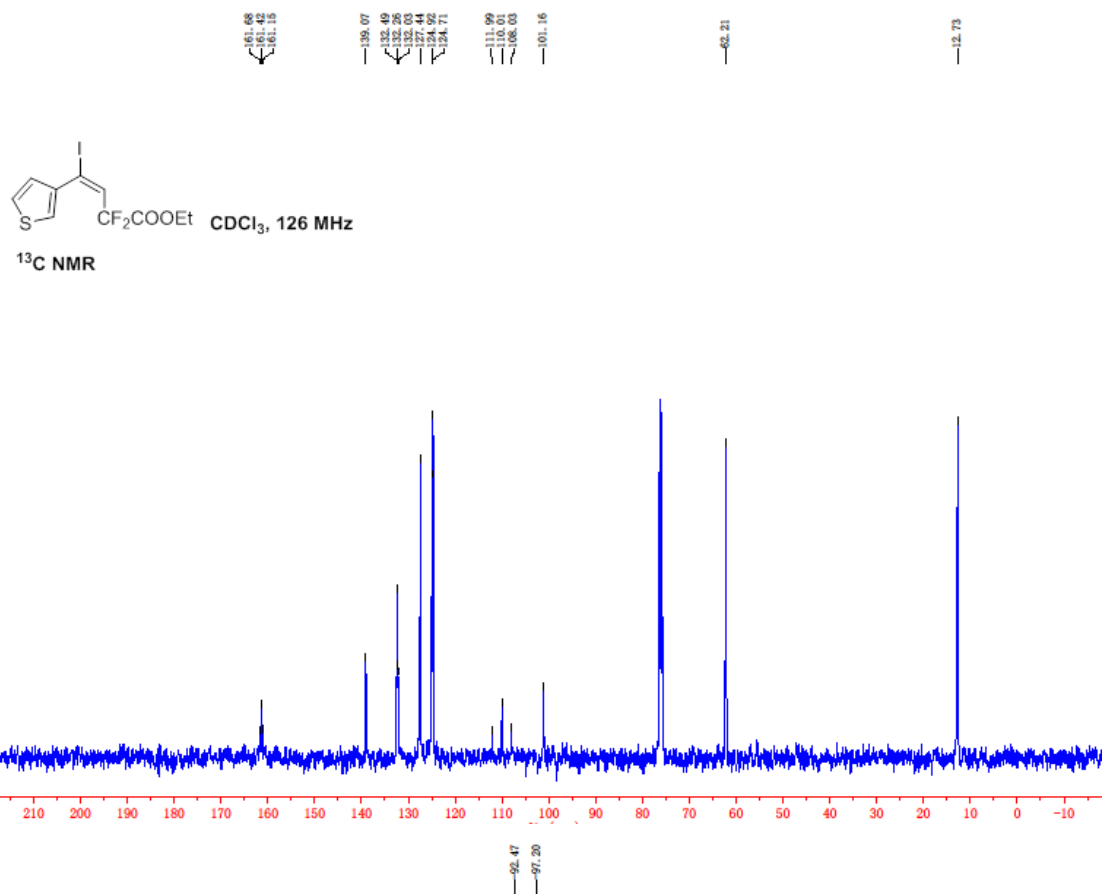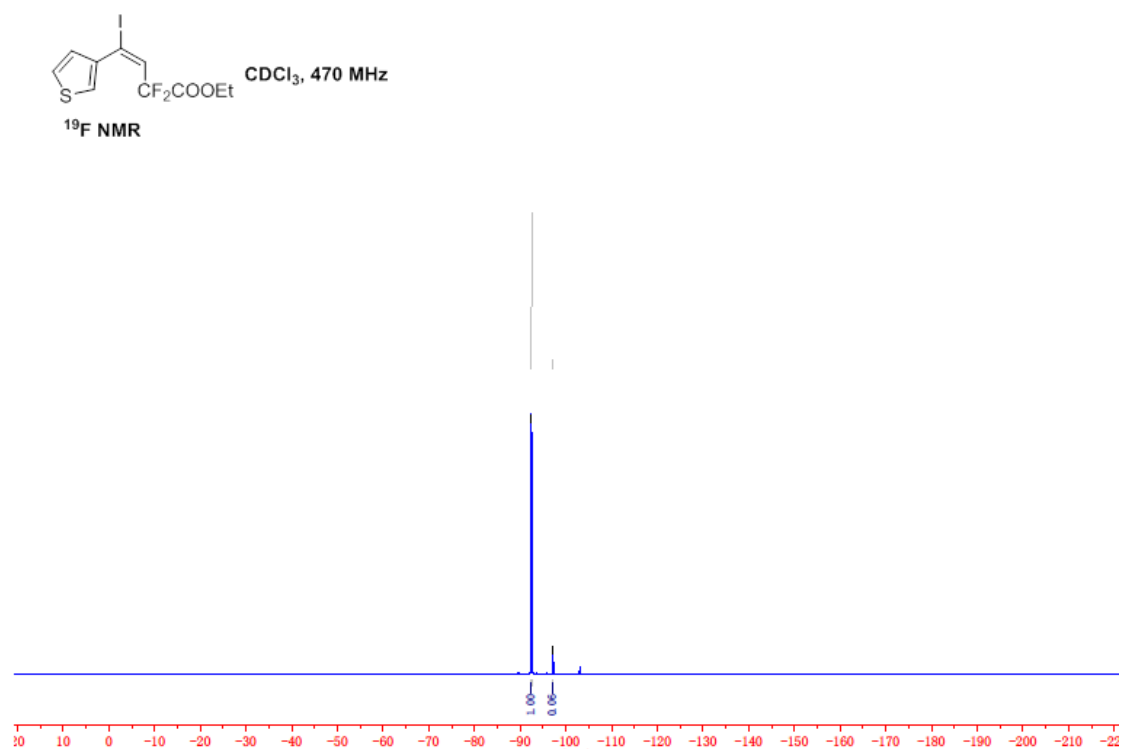

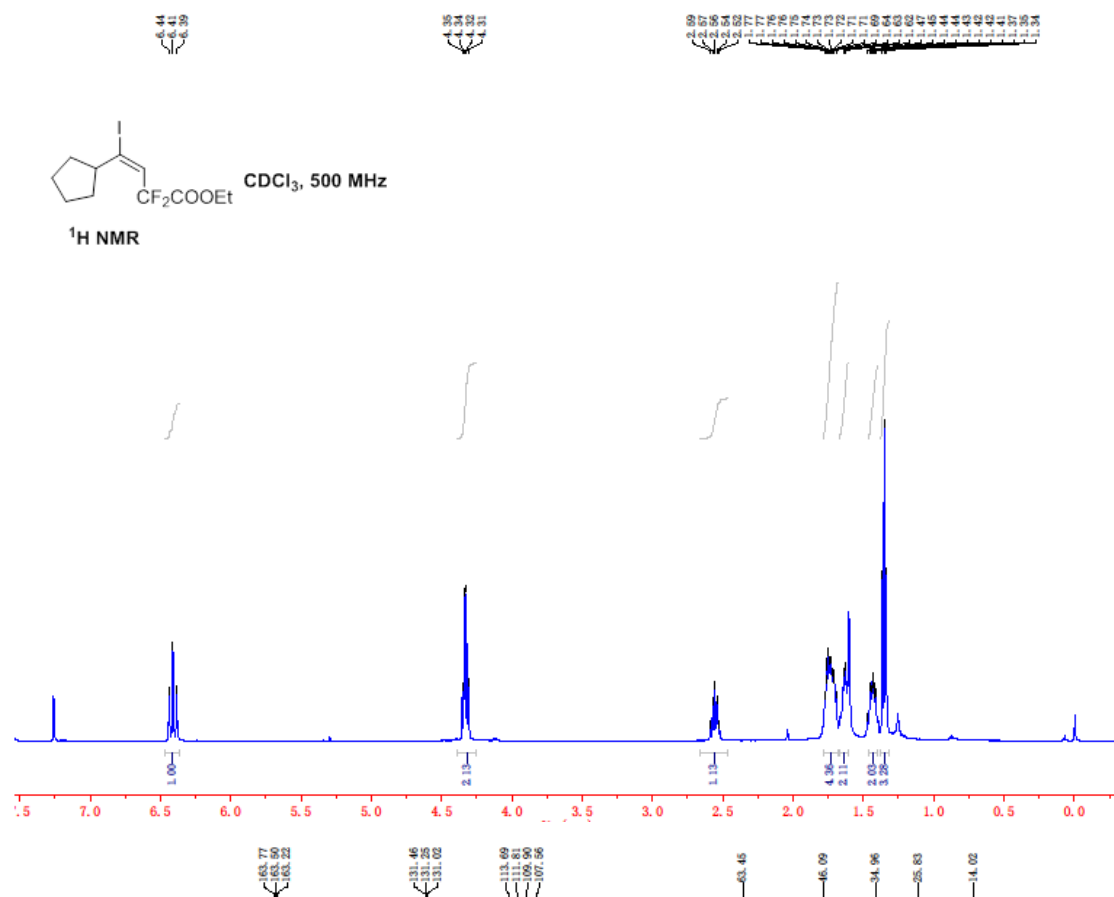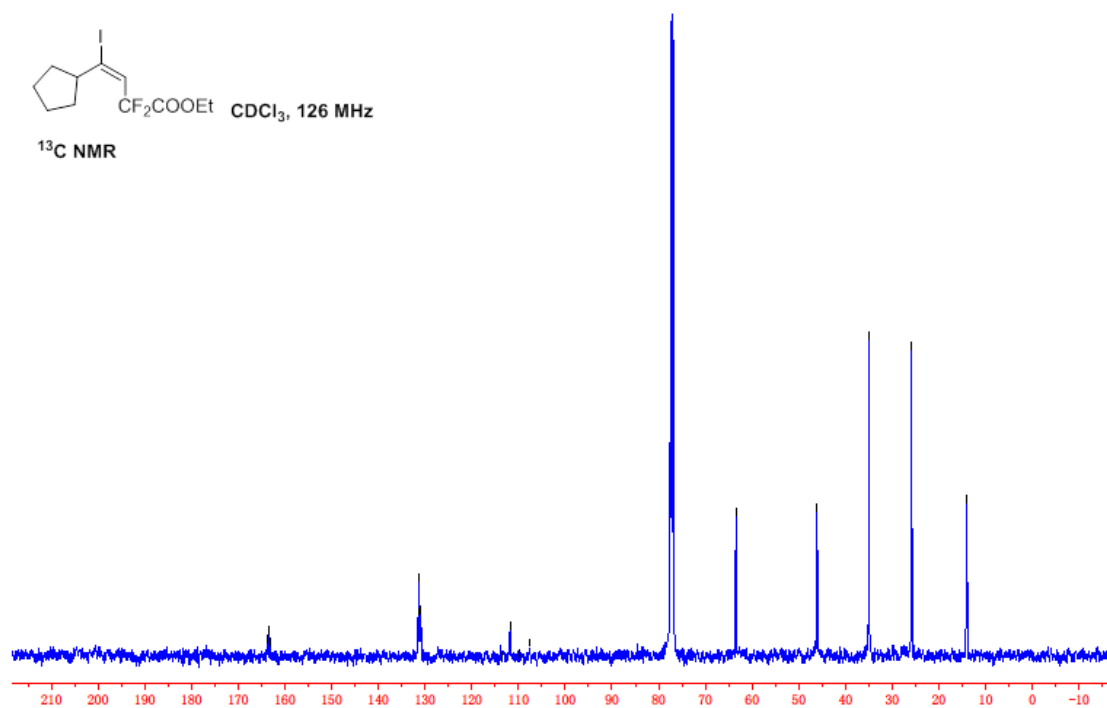

  
**<sup>19</sup>F NMR**  $\text{CDCl}_3$ , 470 MHz

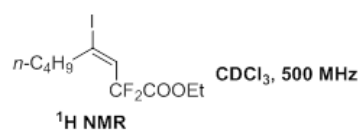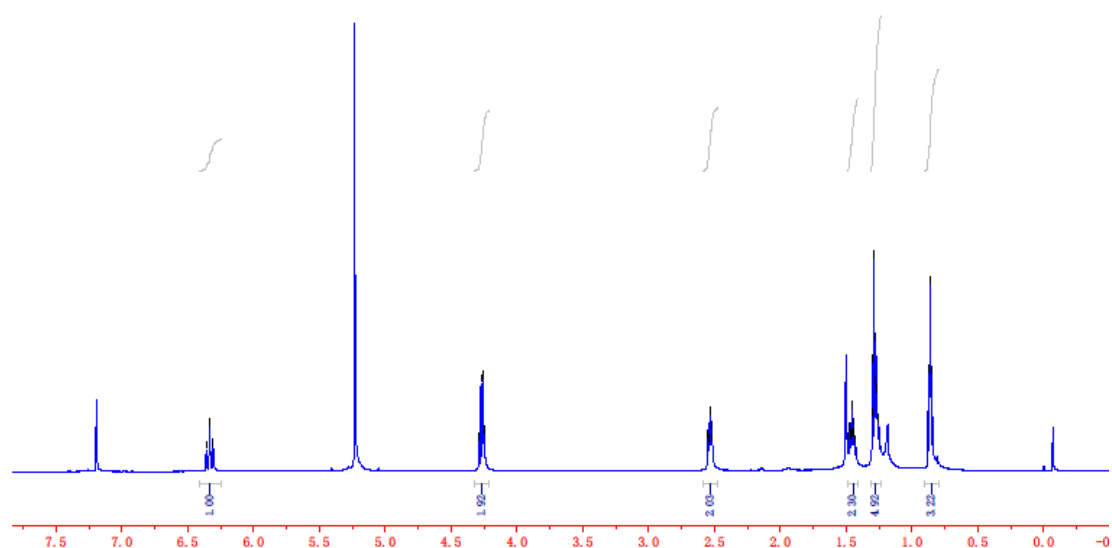

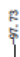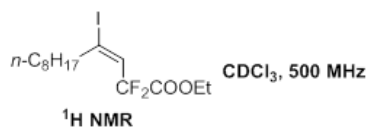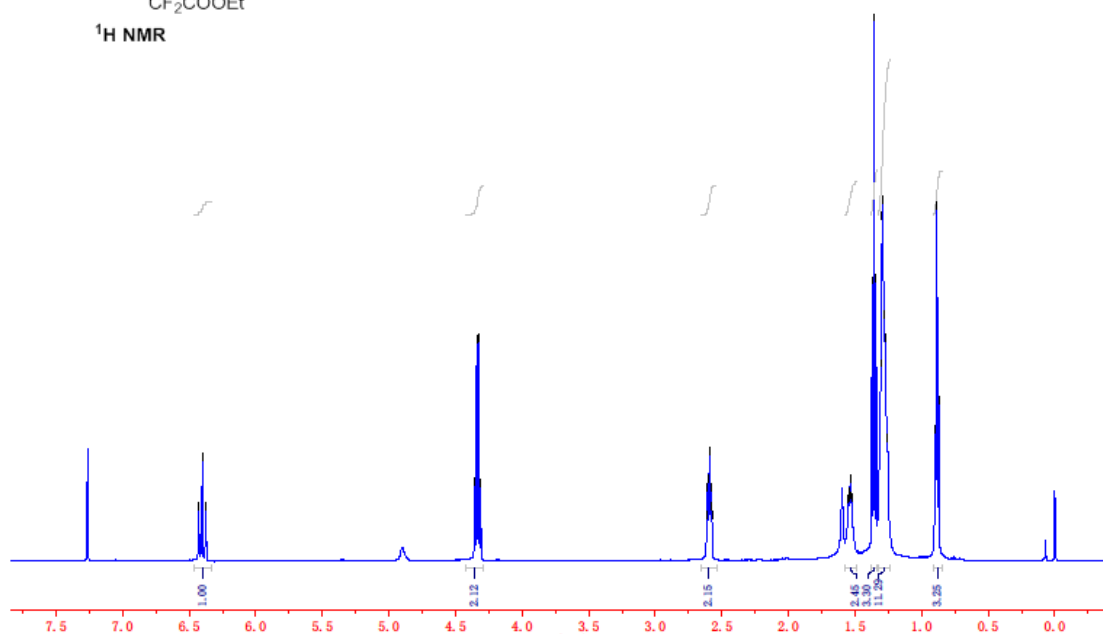



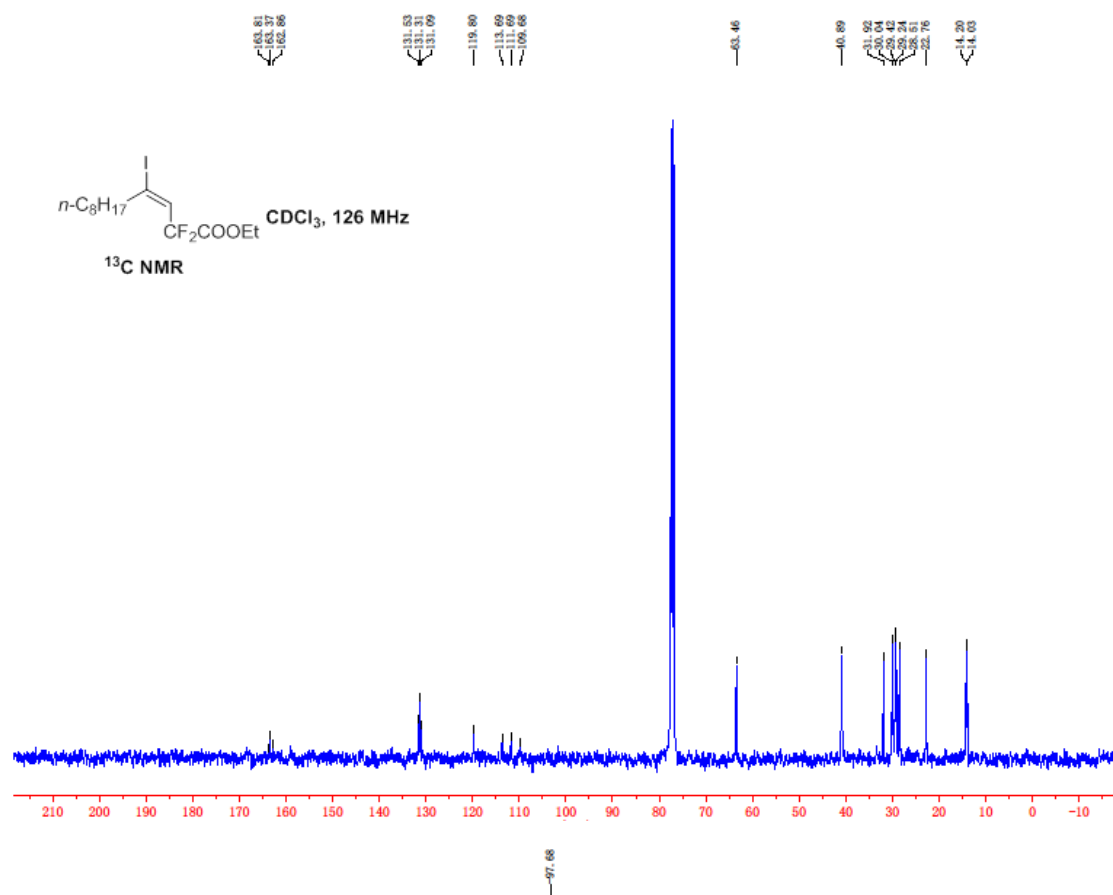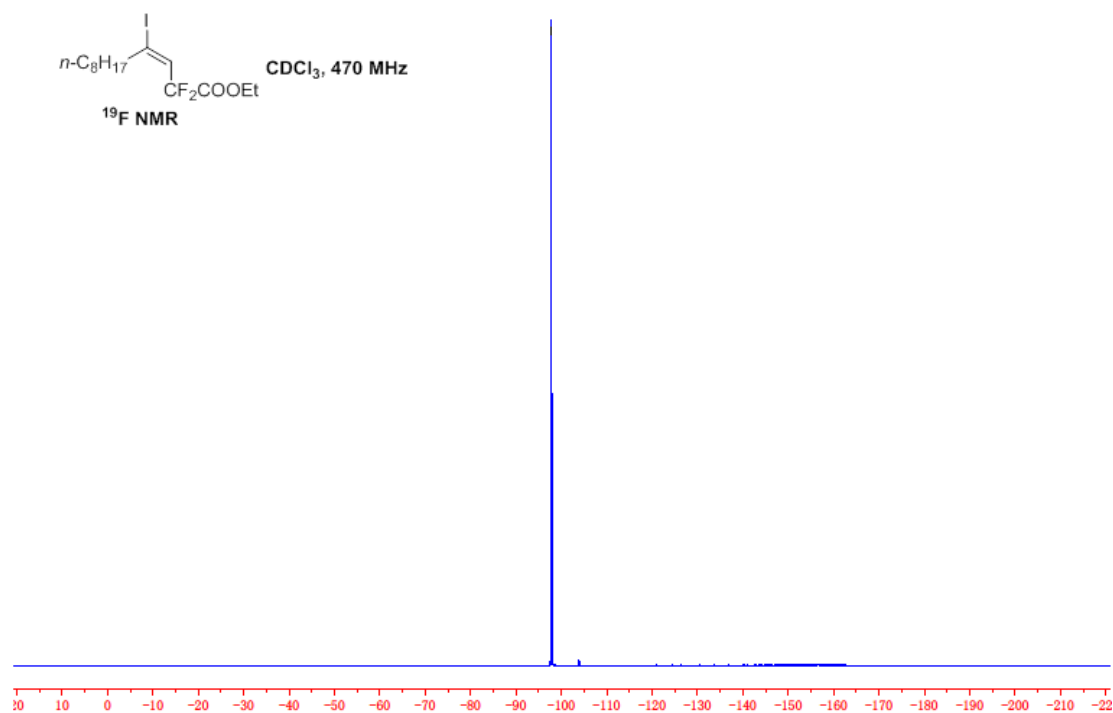

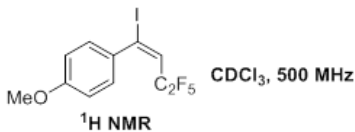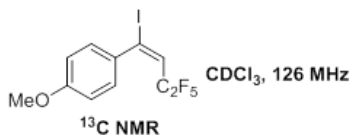

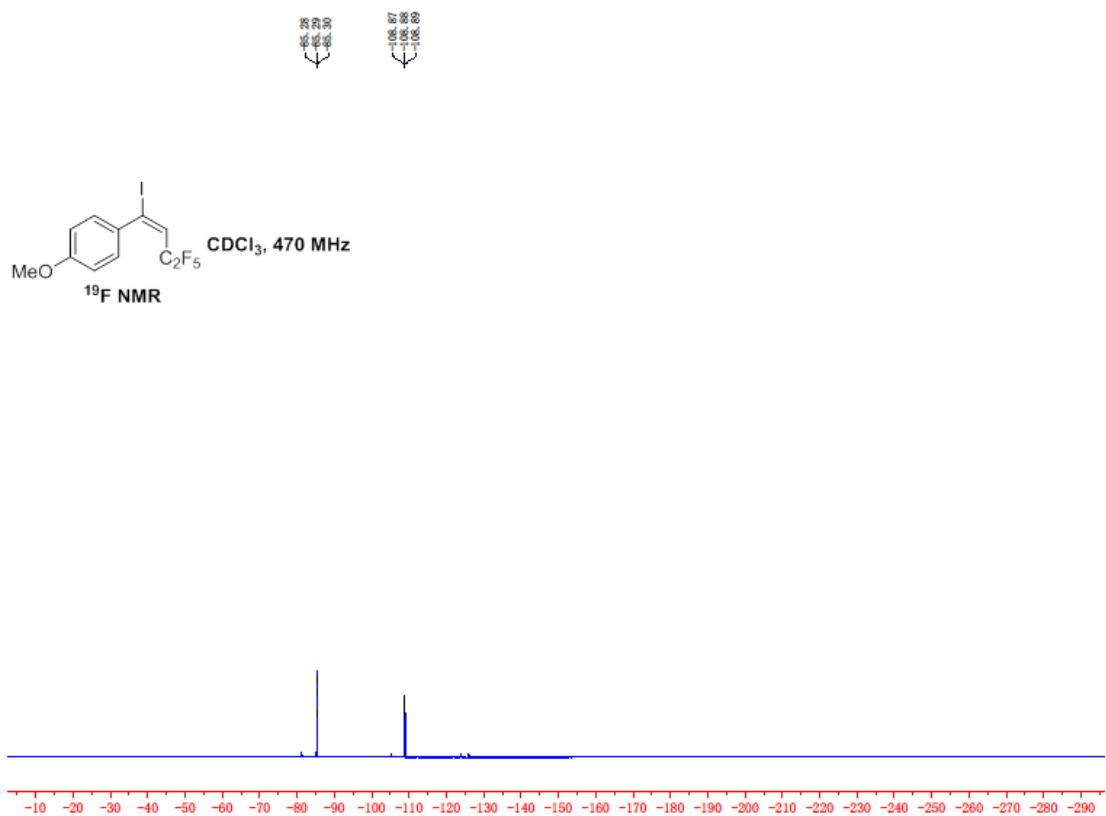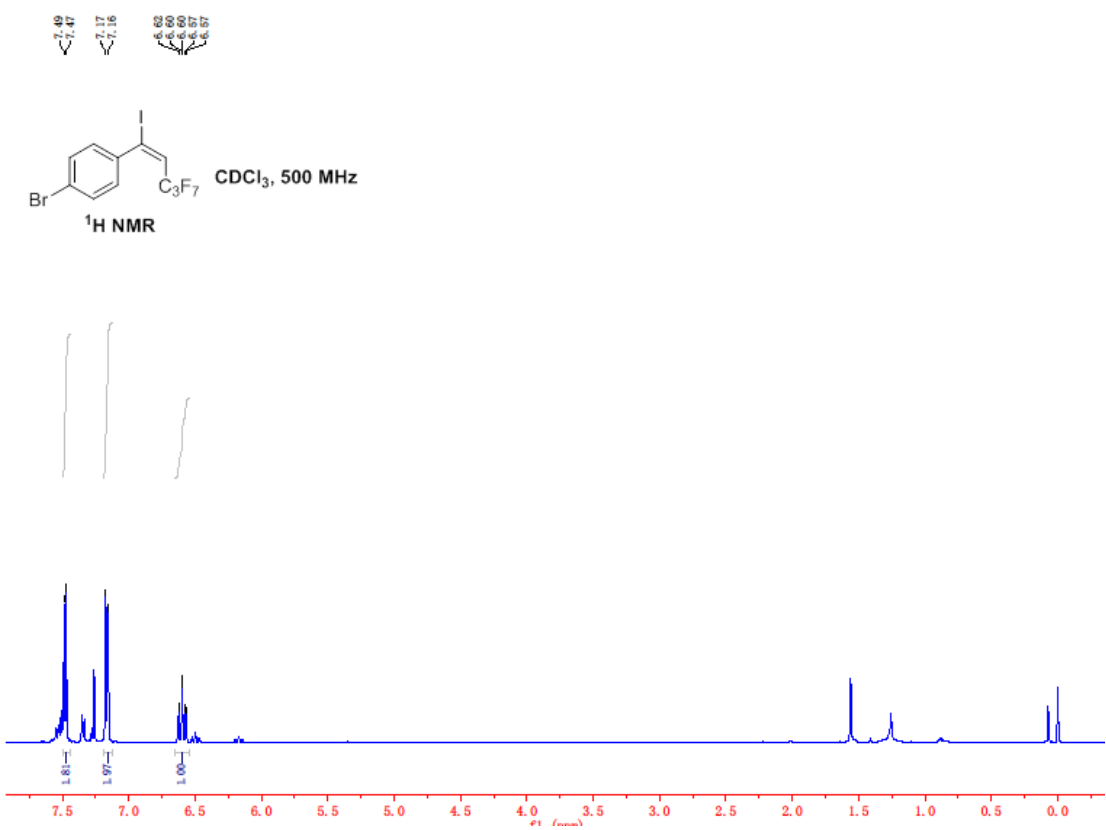

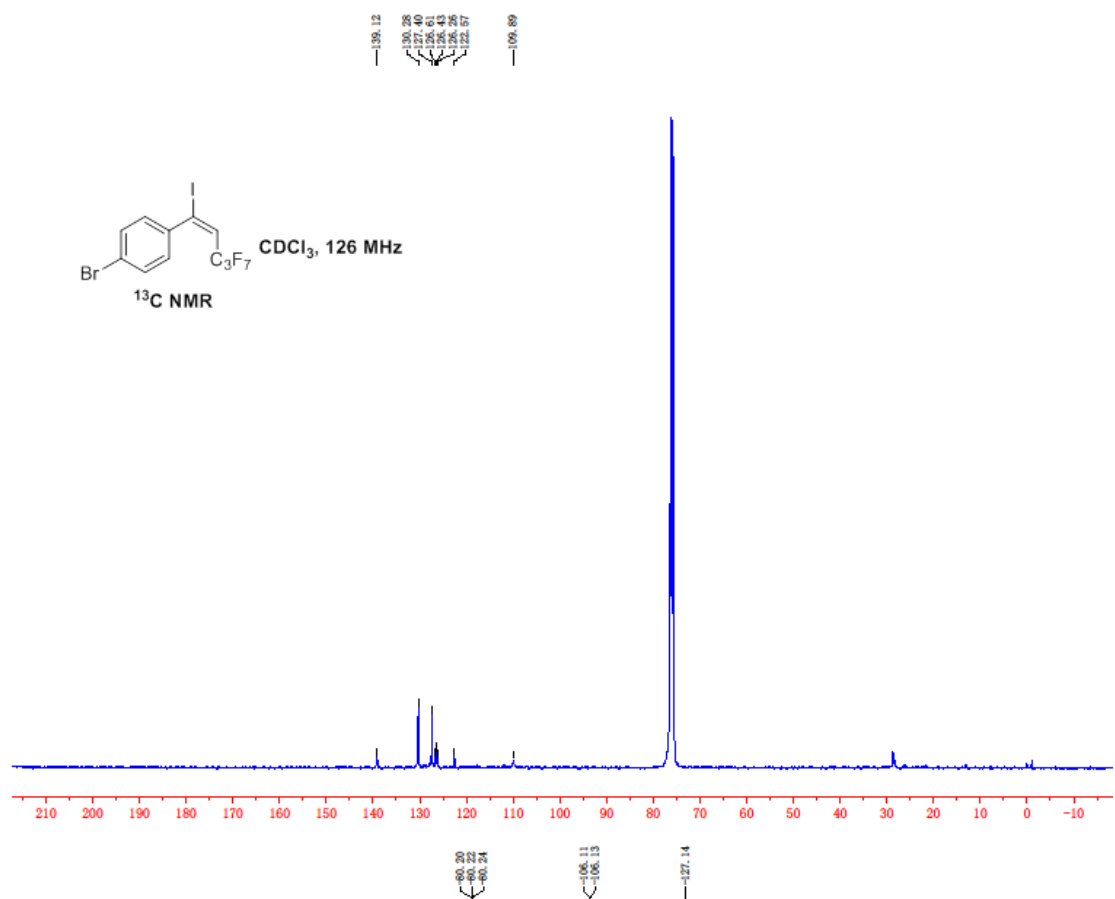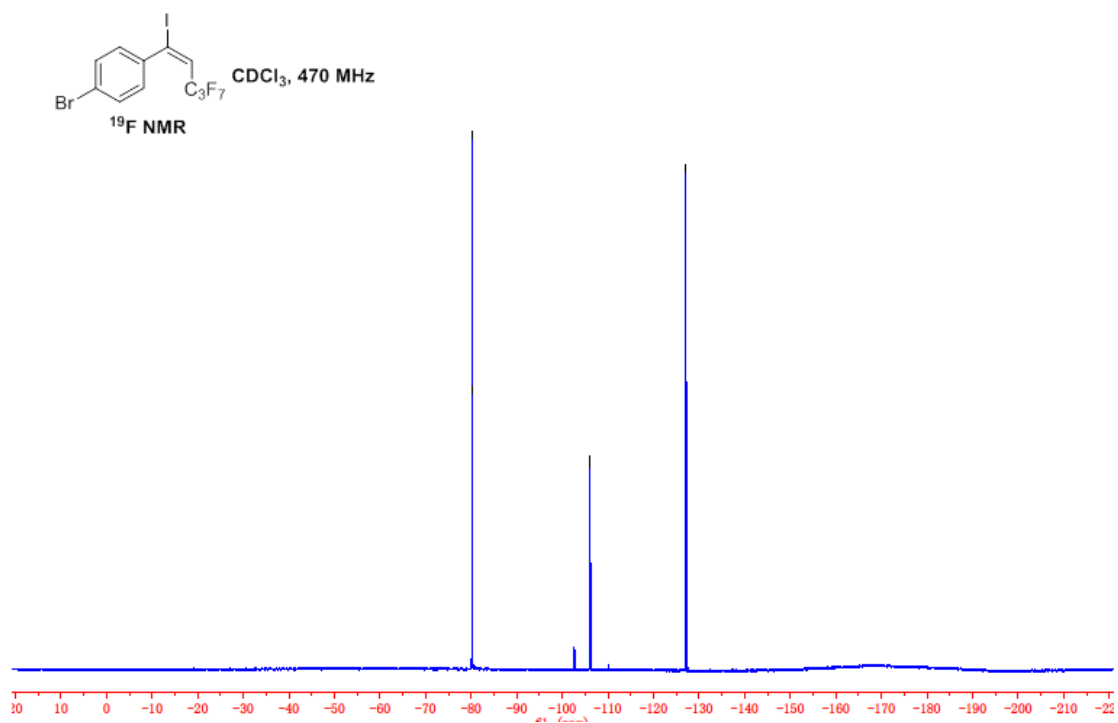

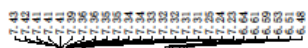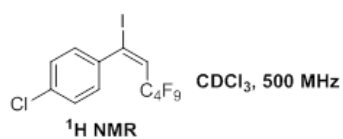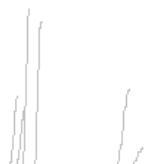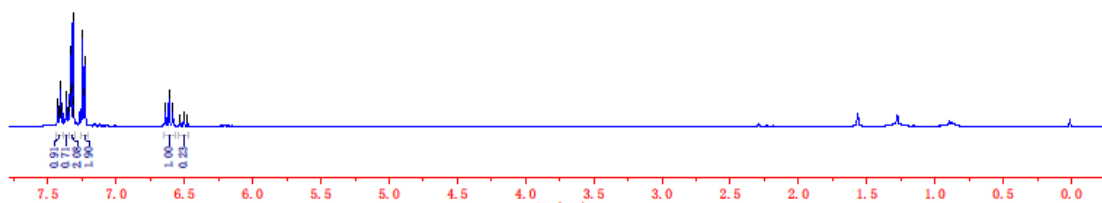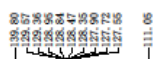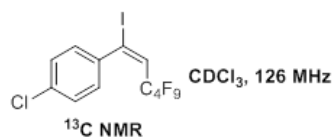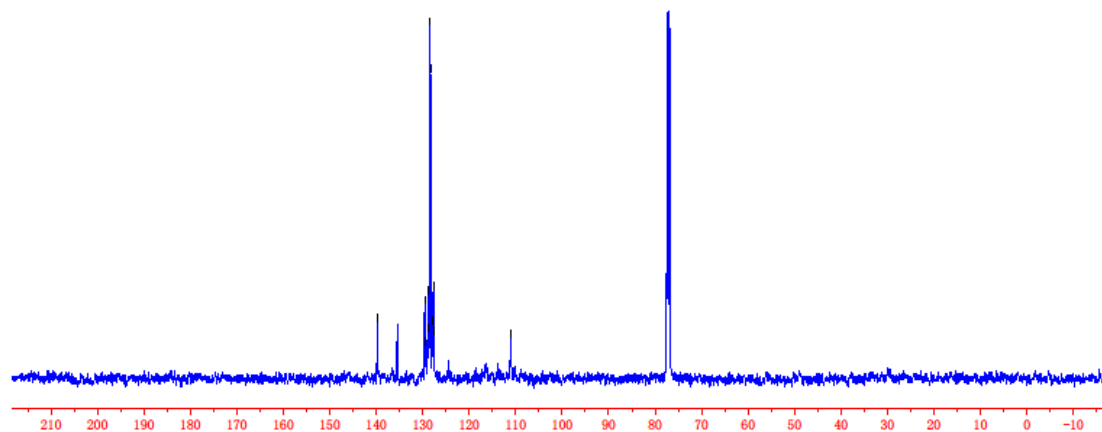

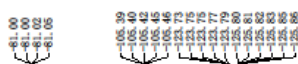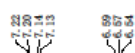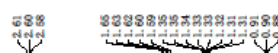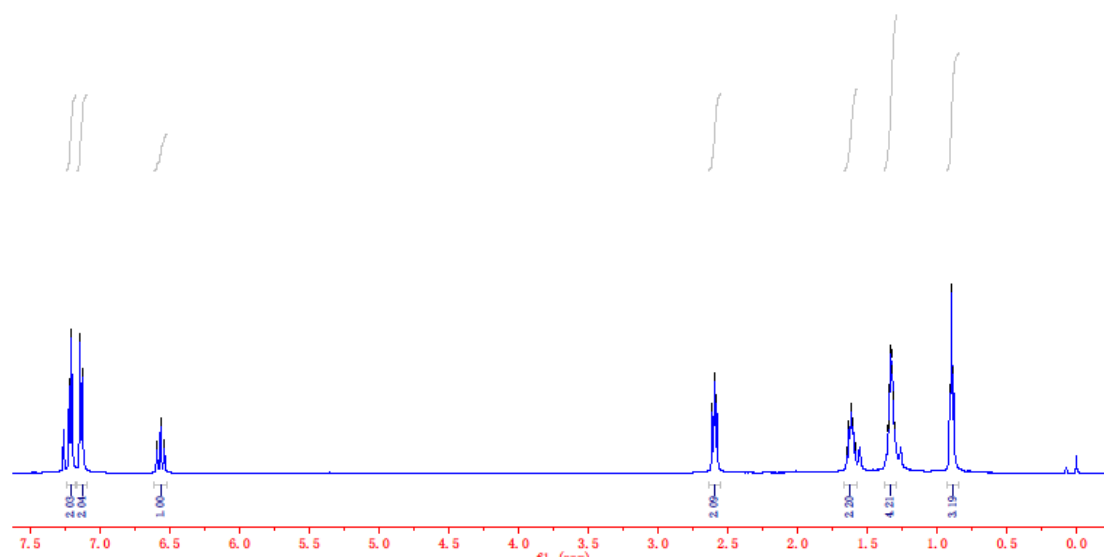



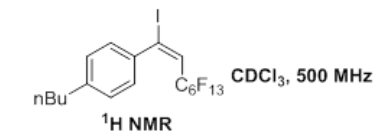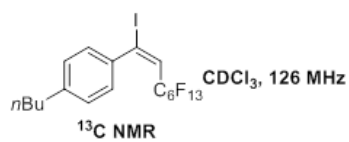





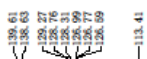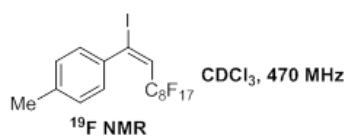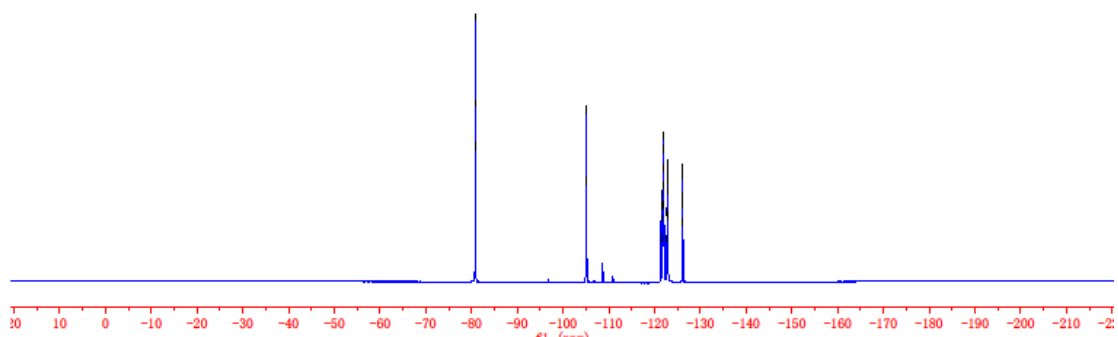

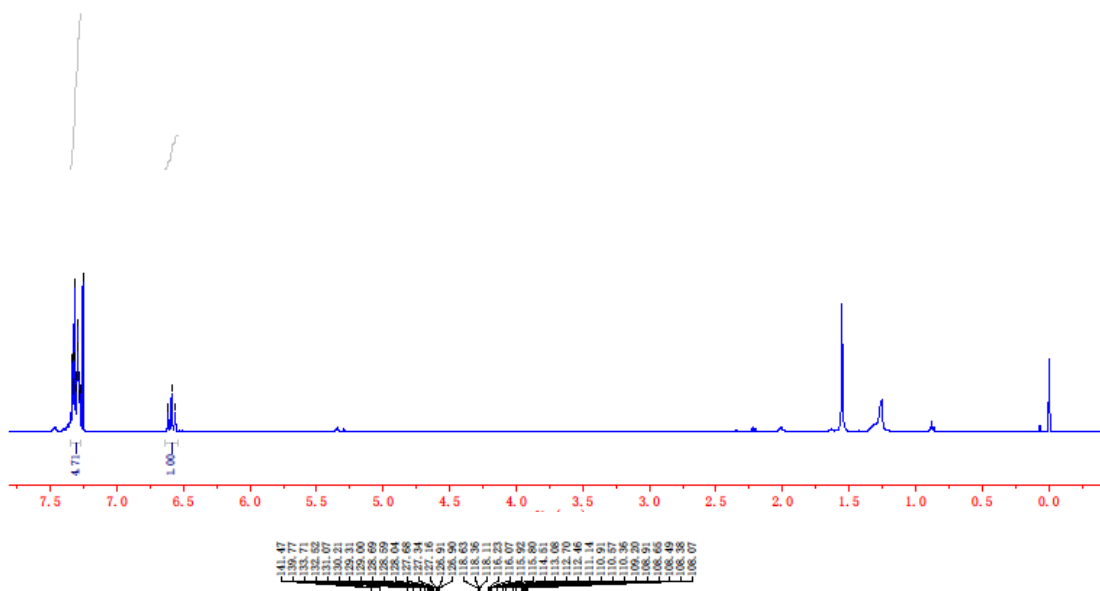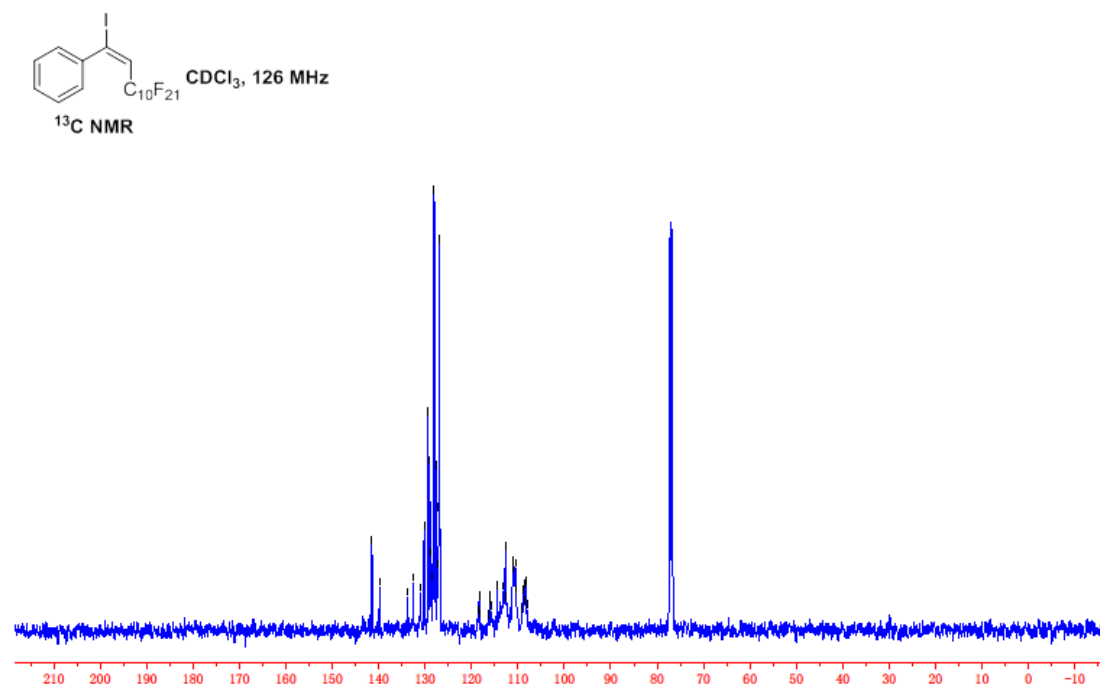

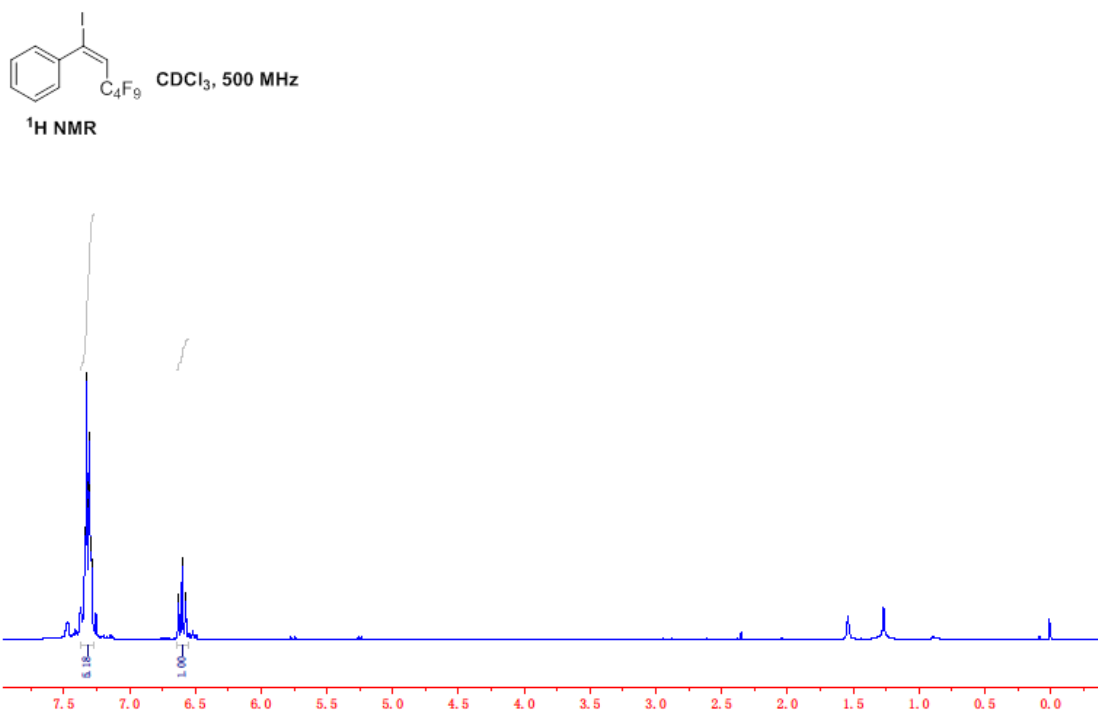

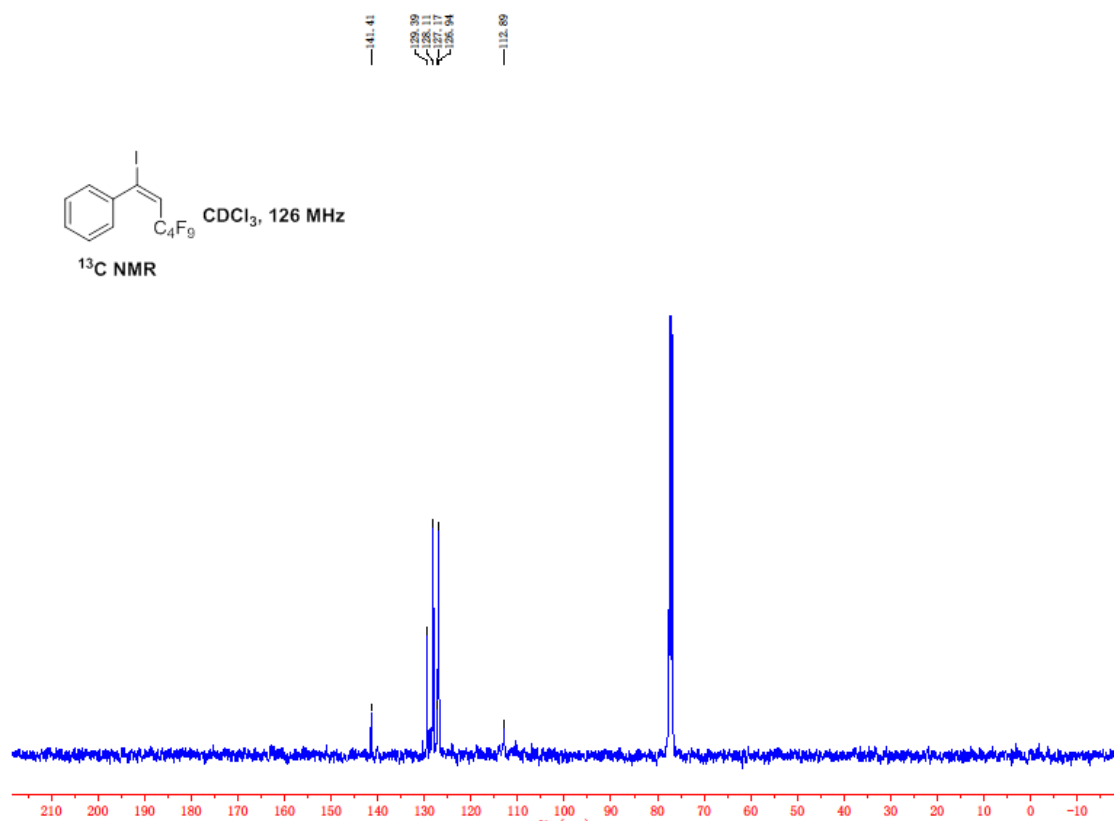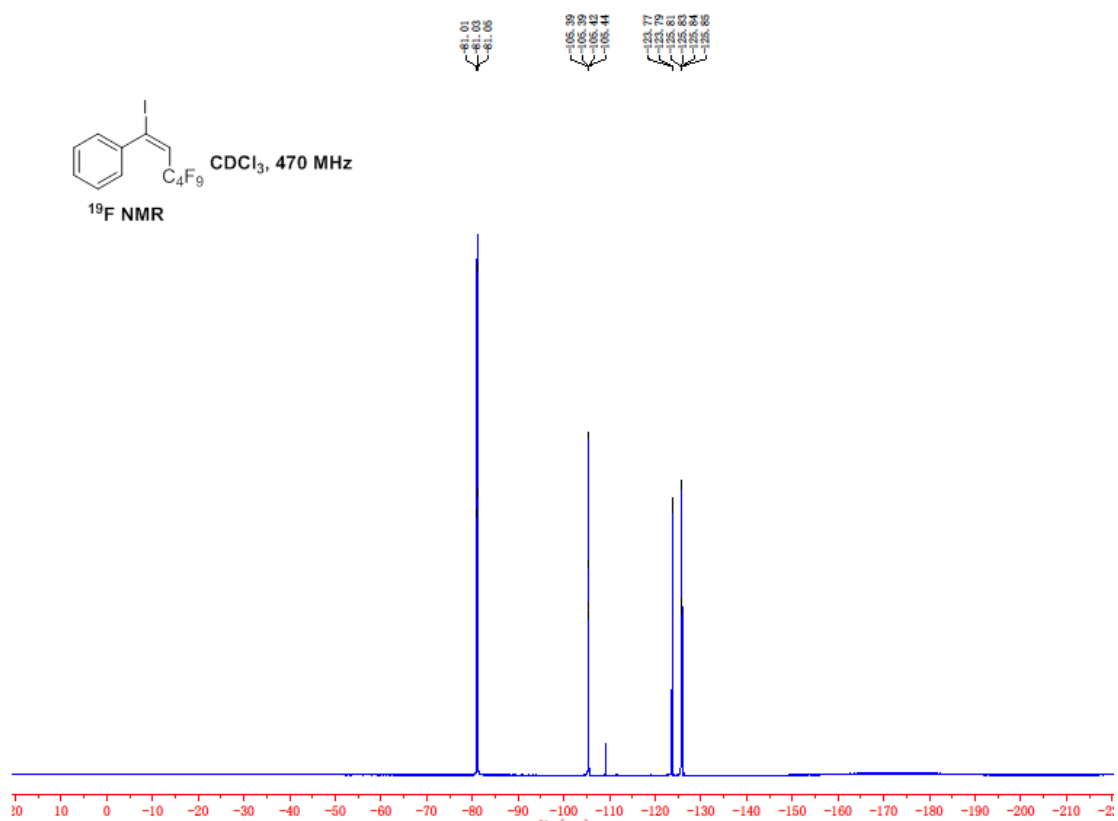

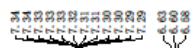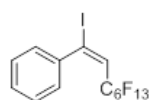

CDCl<sub>3</sub>, 500 MHz

<sup>1</sup>H NMR

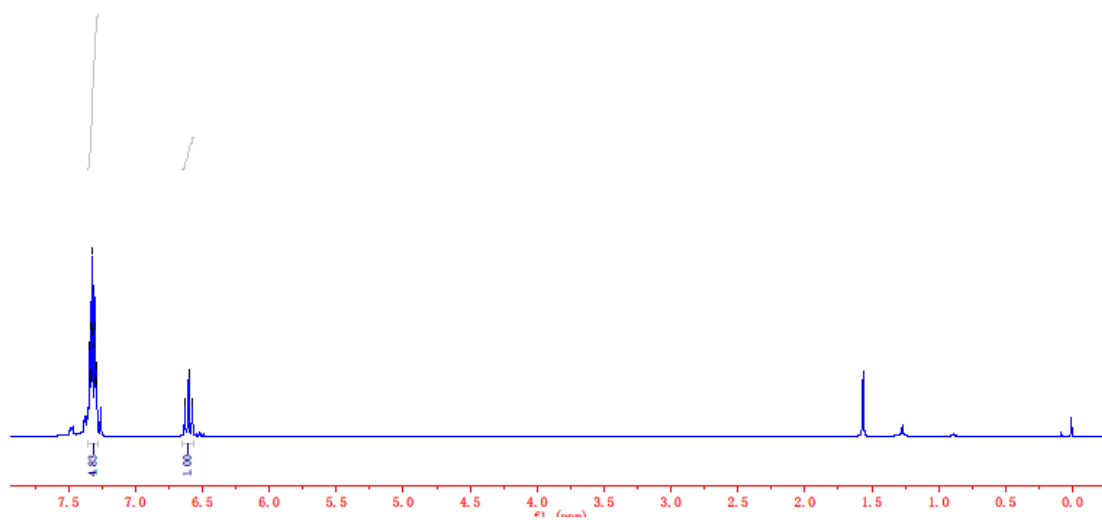

141.43  
129.38  
128.10  
127.10  
126.93  
112.84

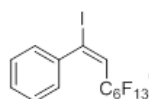

CDCl<sub>3</sub>, 126 MHz

<sup>13</sup>C NMR

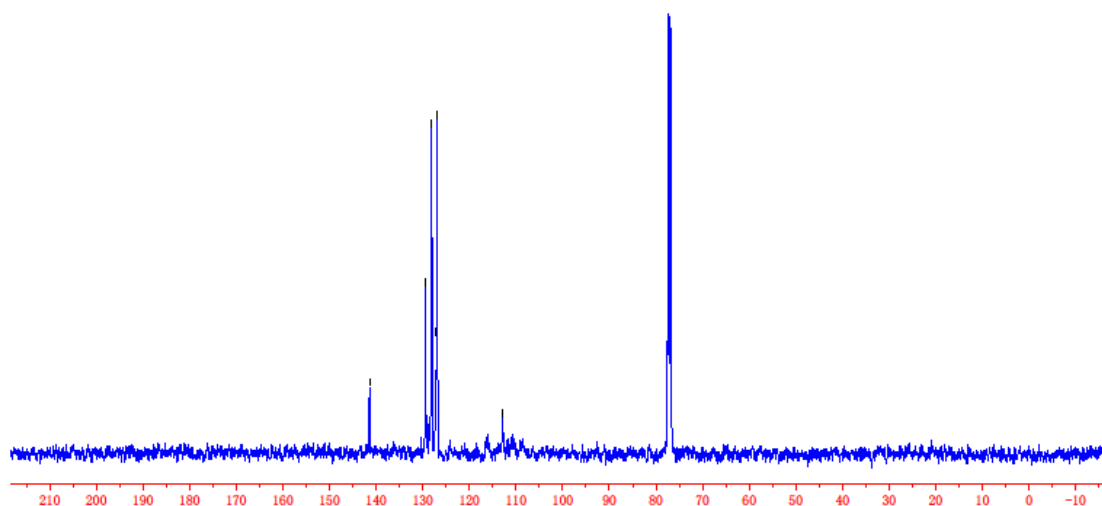

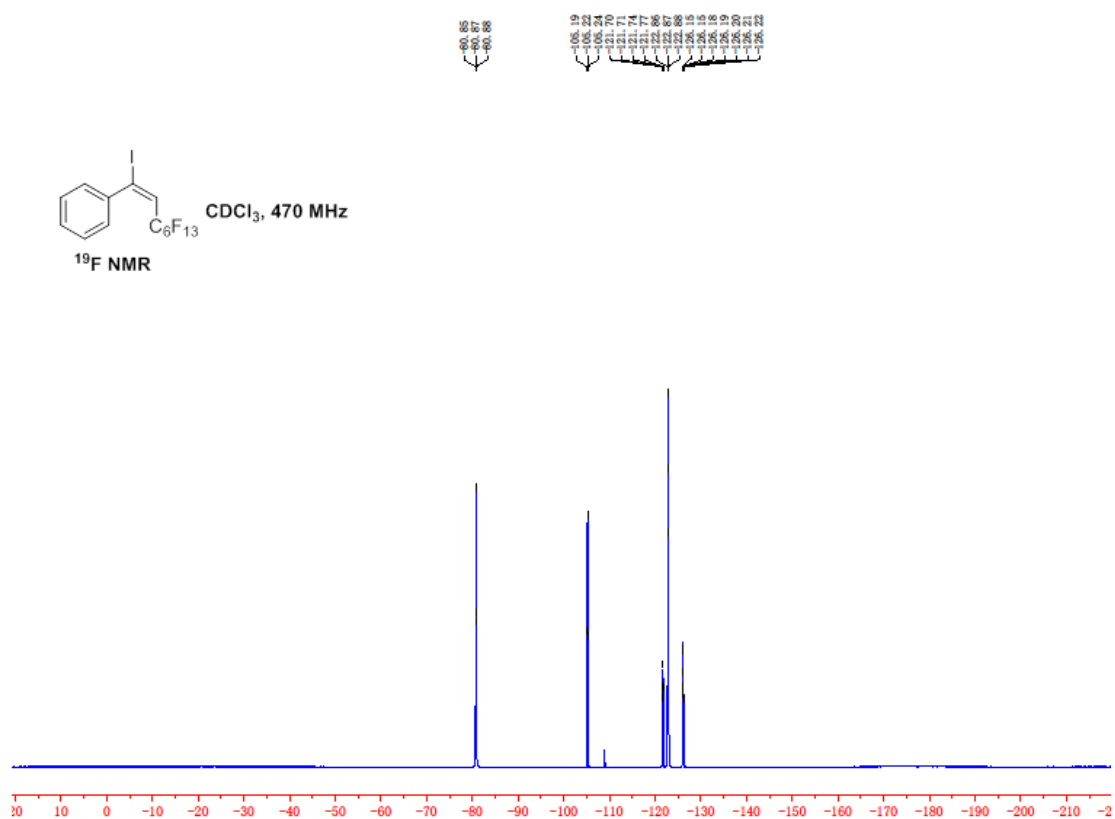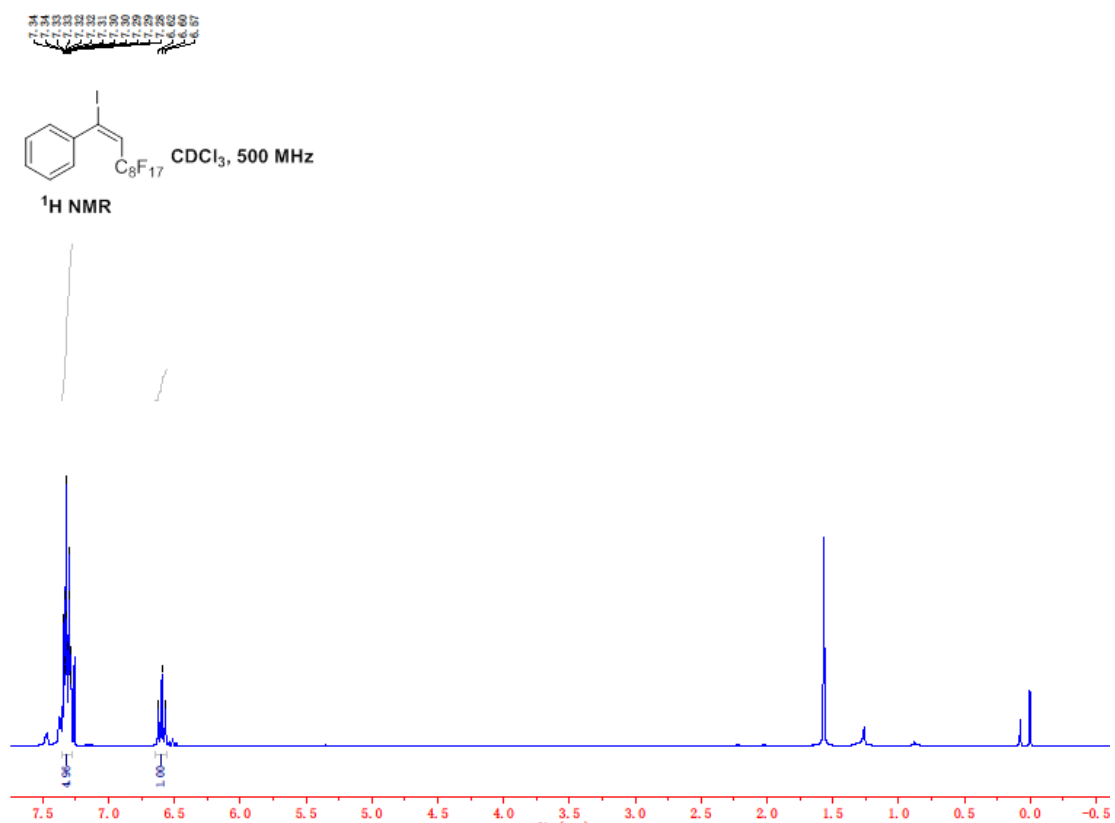

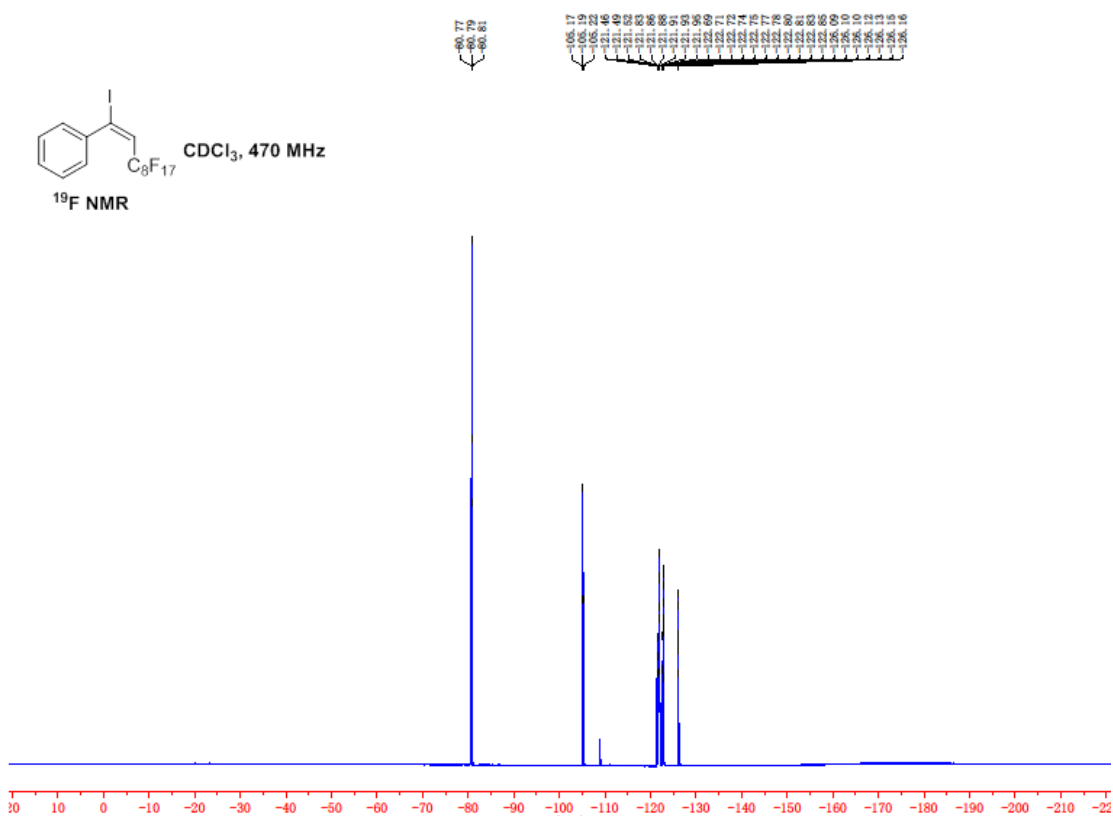



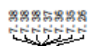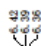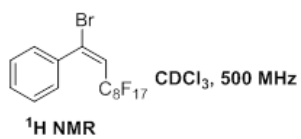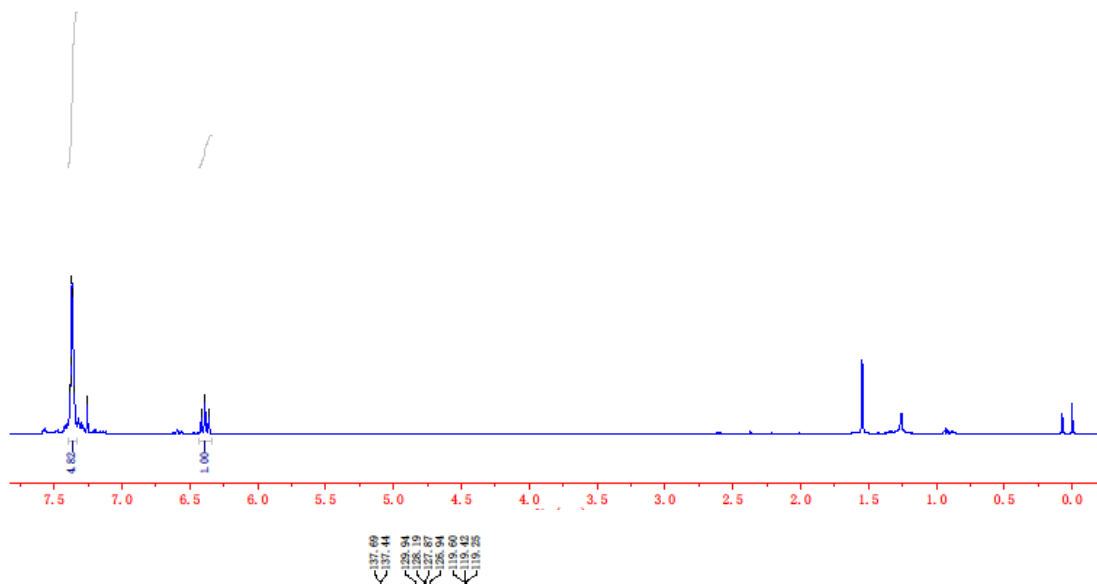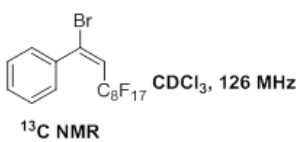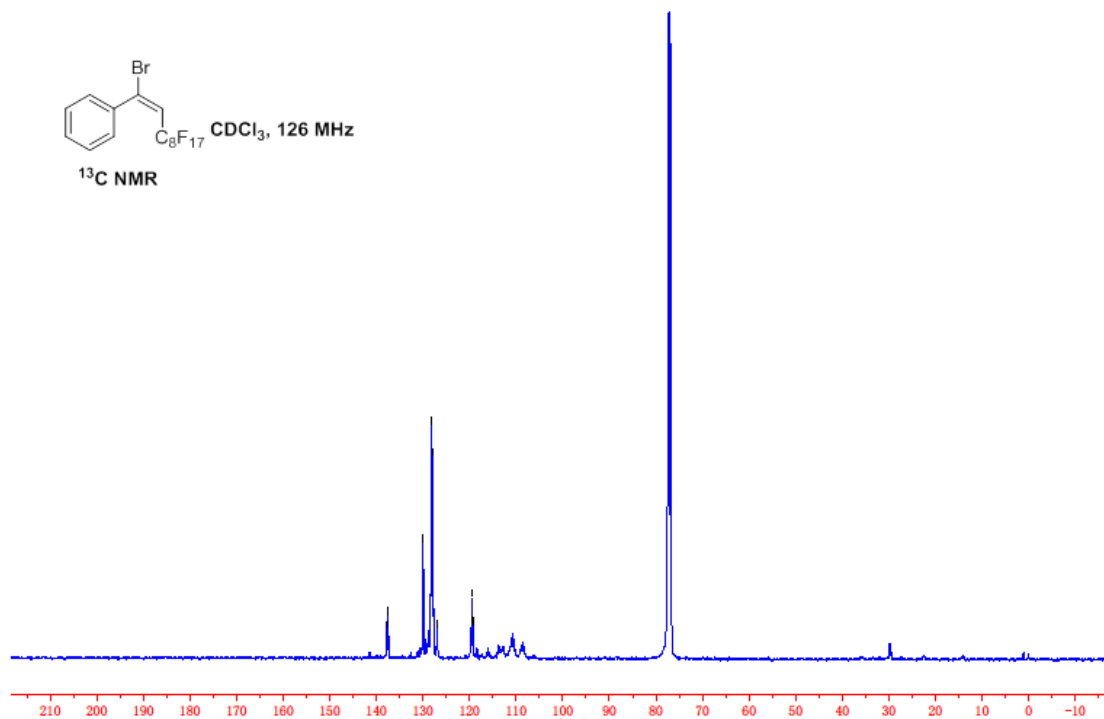

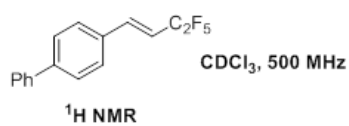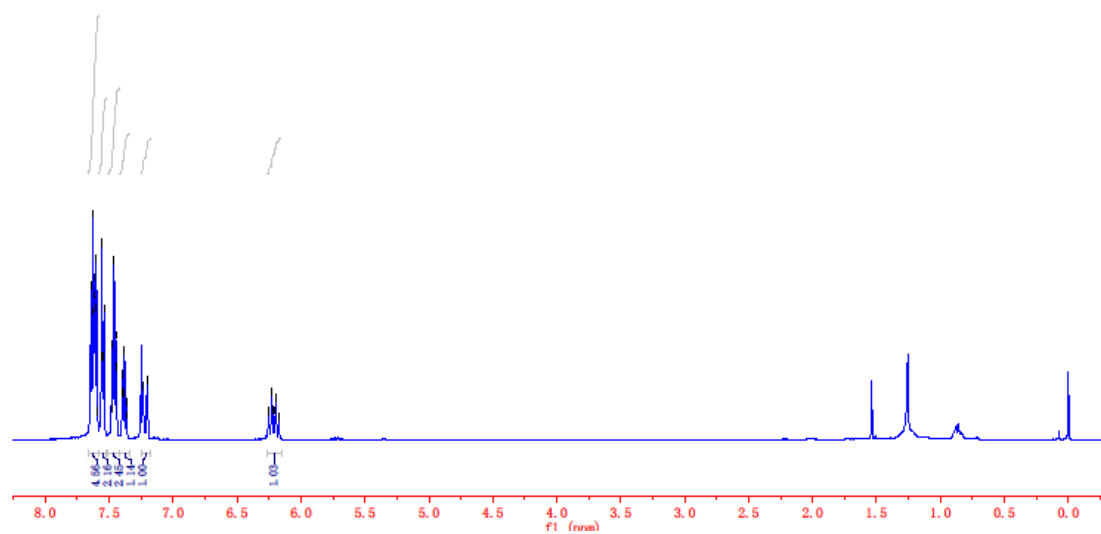

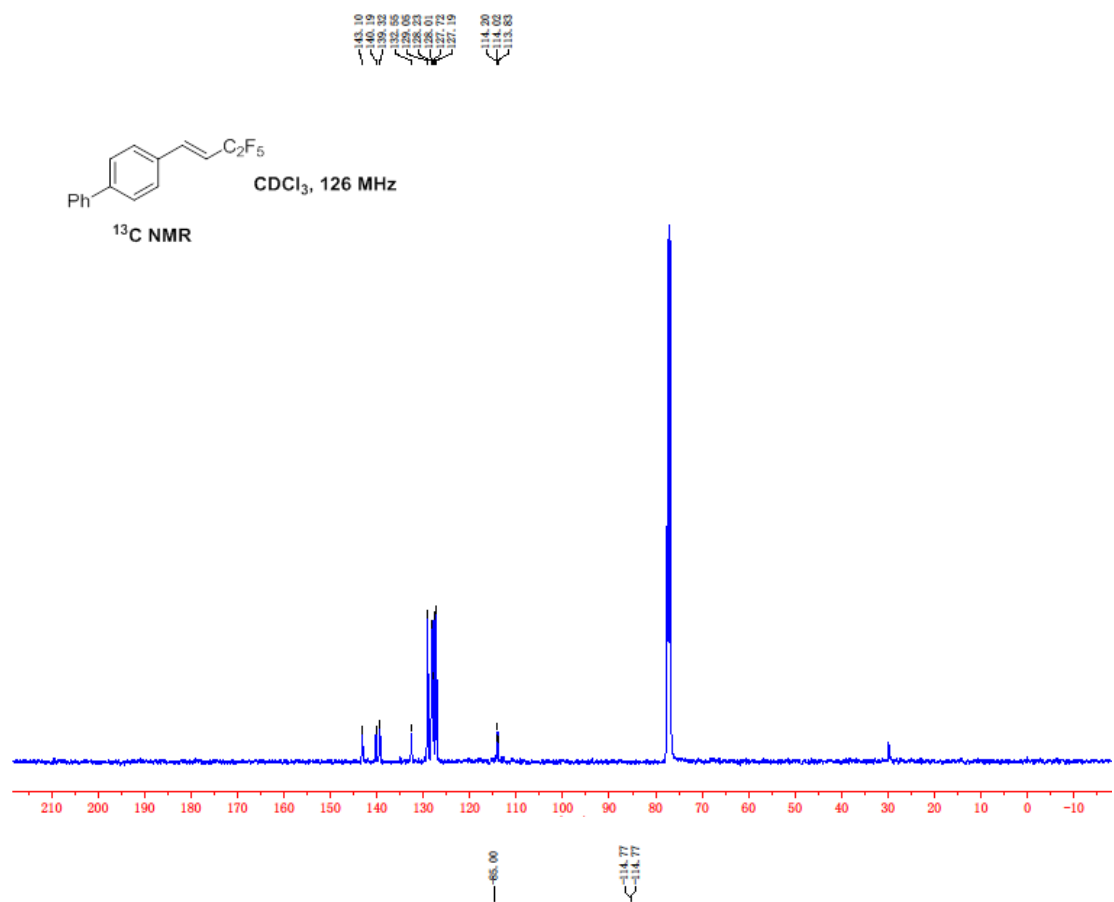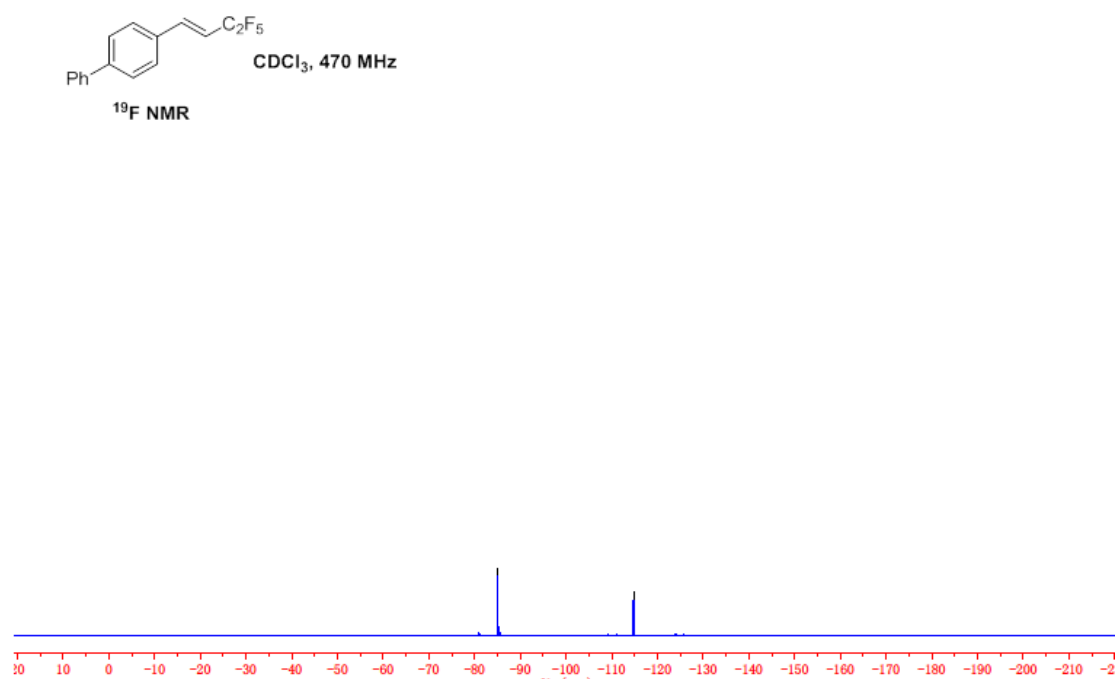

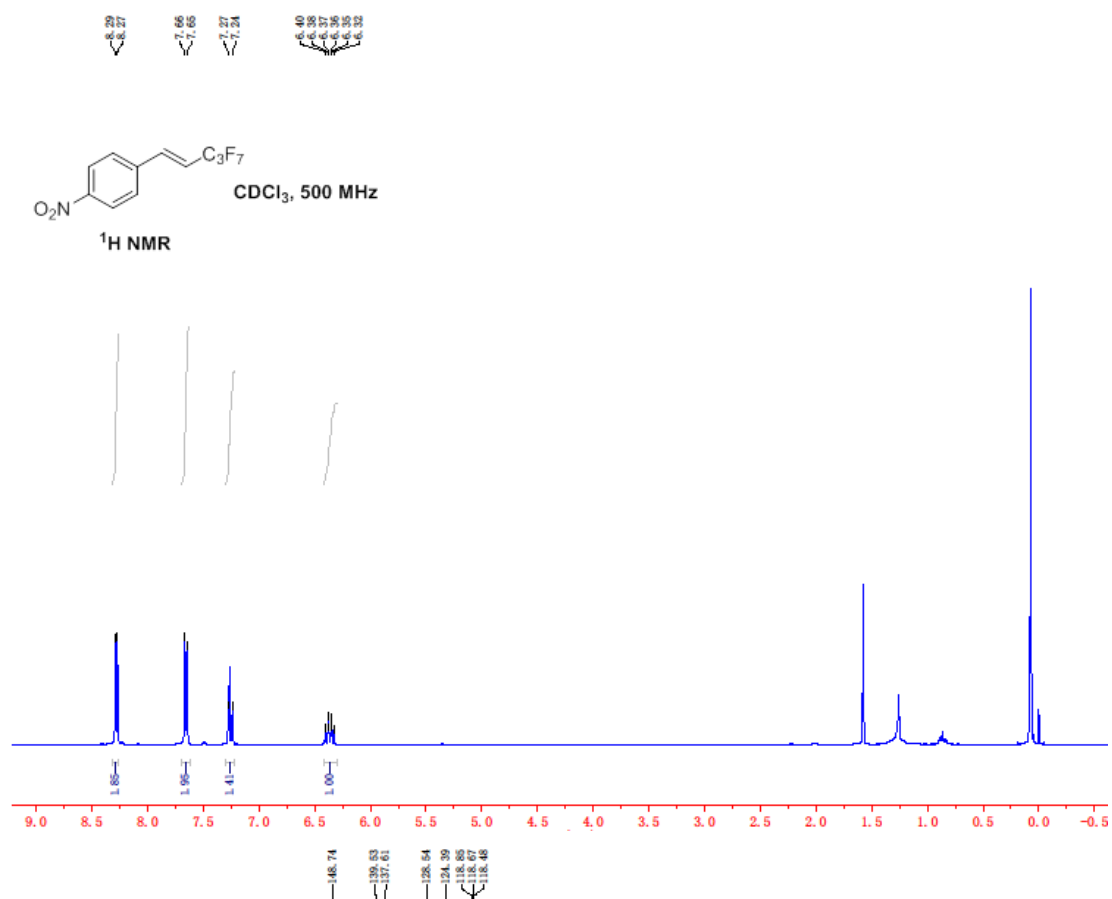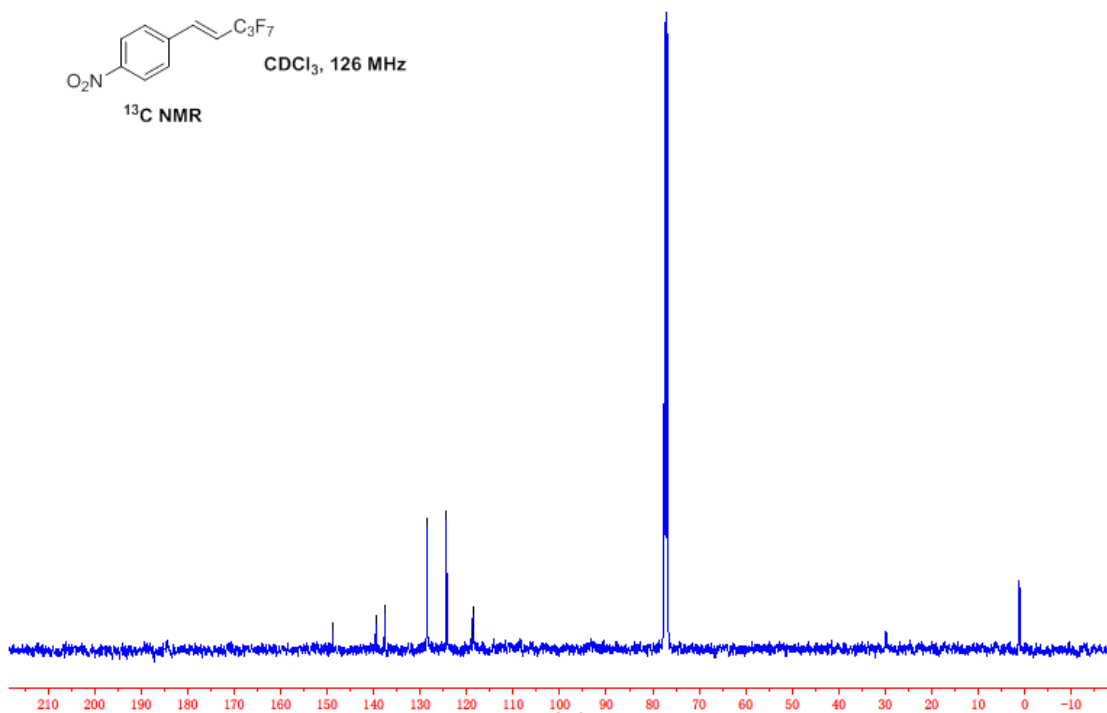

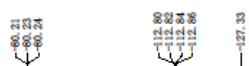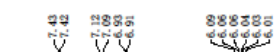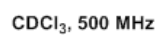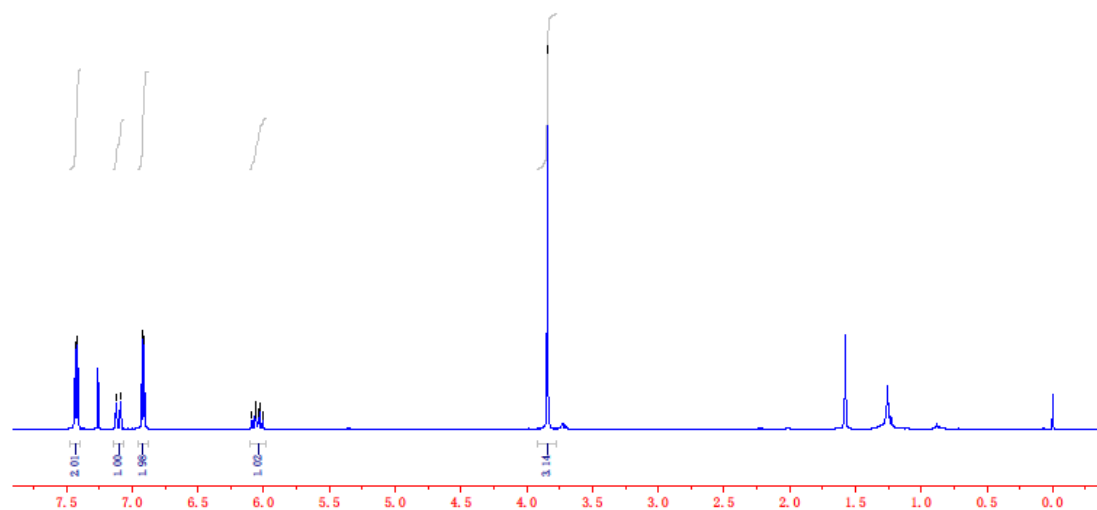

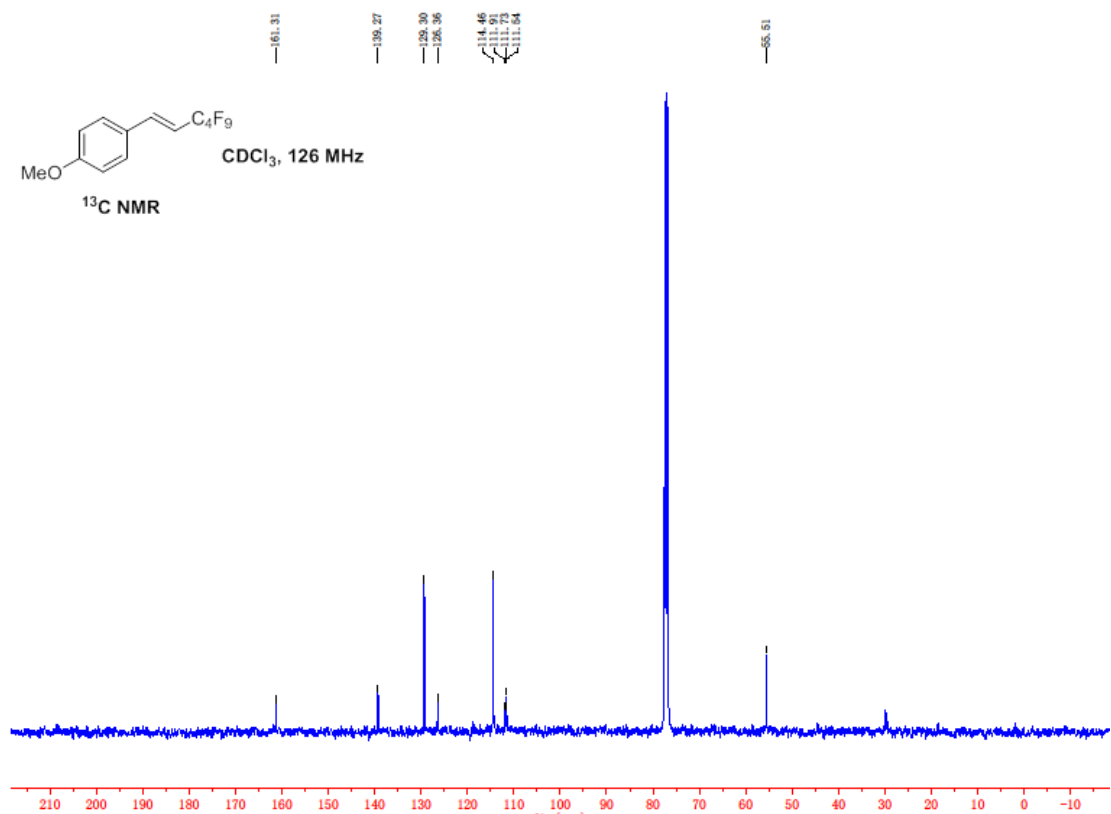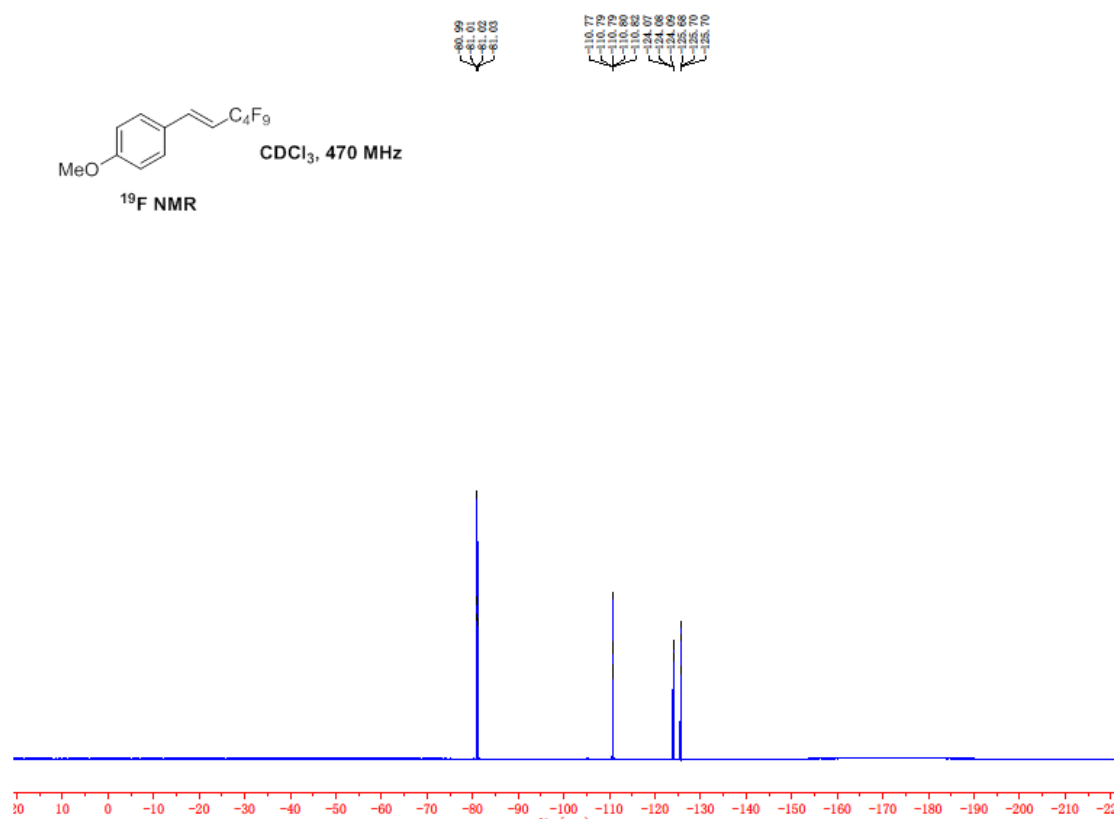

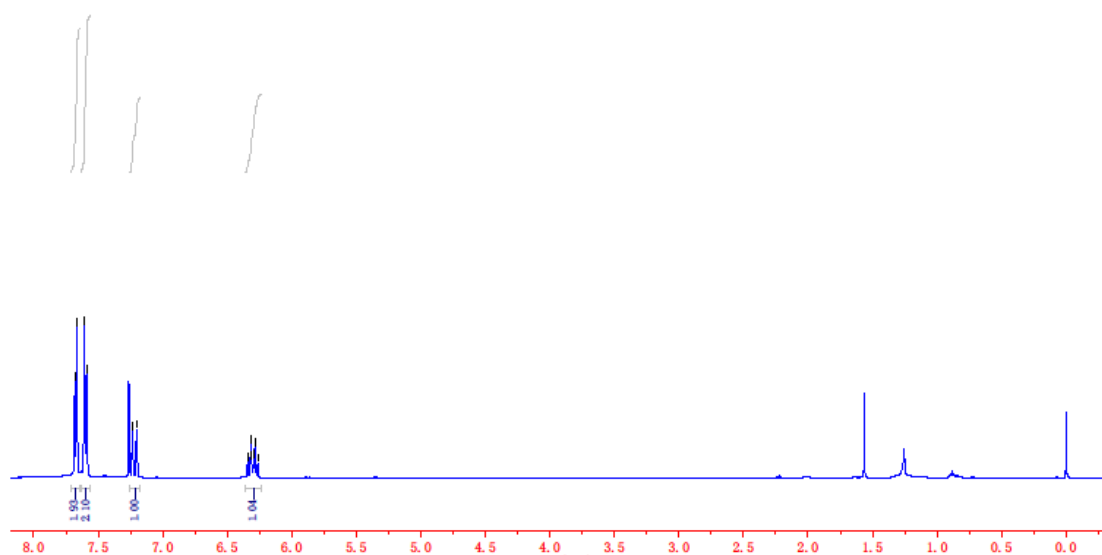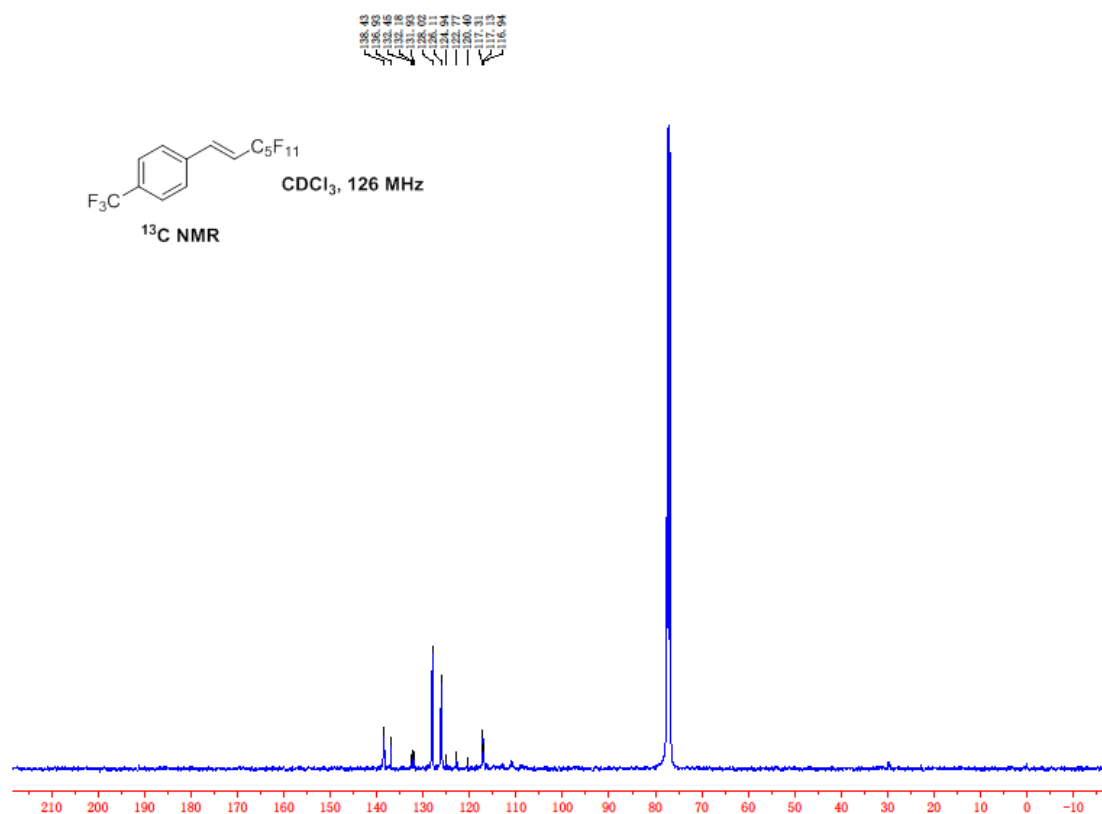

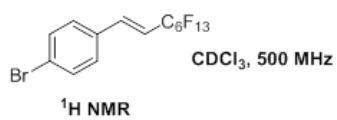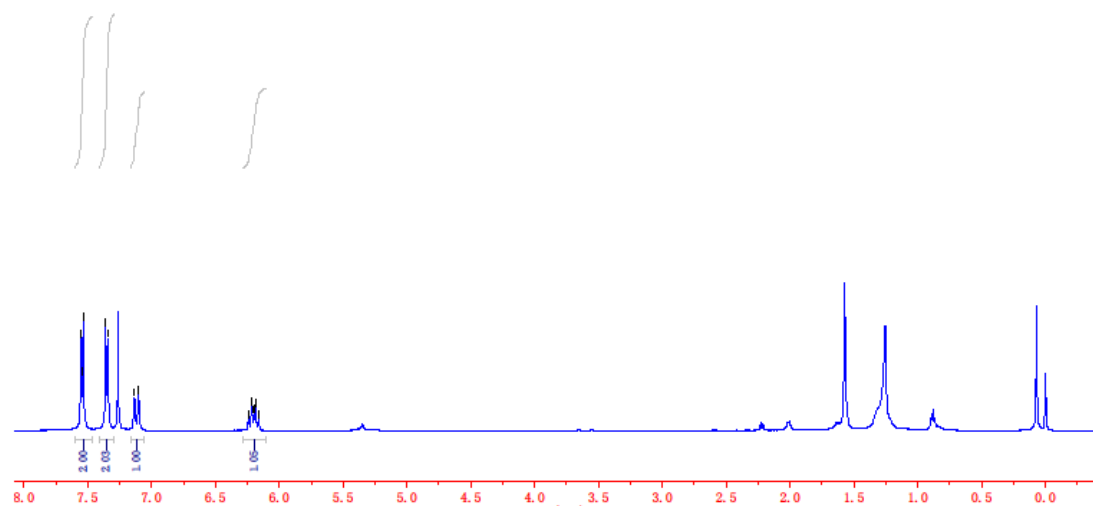



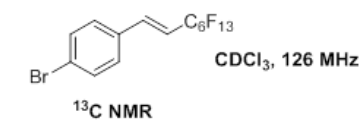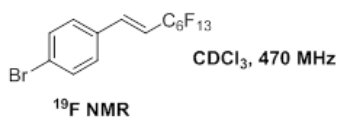

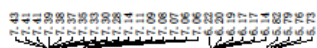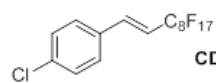

CDCl<sub>3</sub>, 500 MHz

<sup>1</sup>H NMR

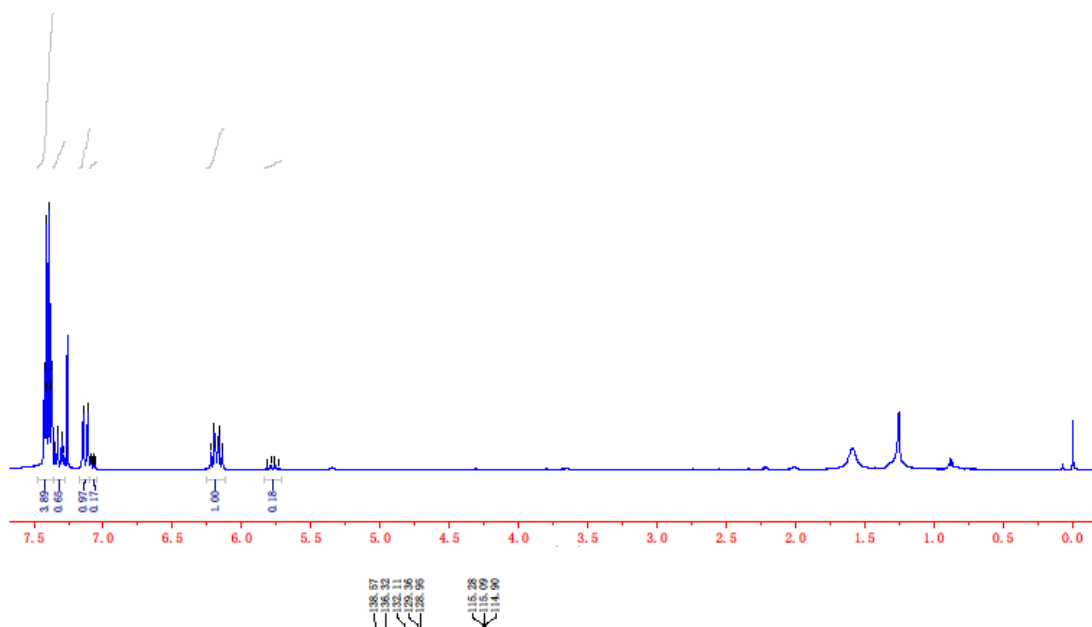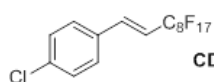

CDCl<sub>3</sub>, 126 MHz

<sup>13</sup>C NMR

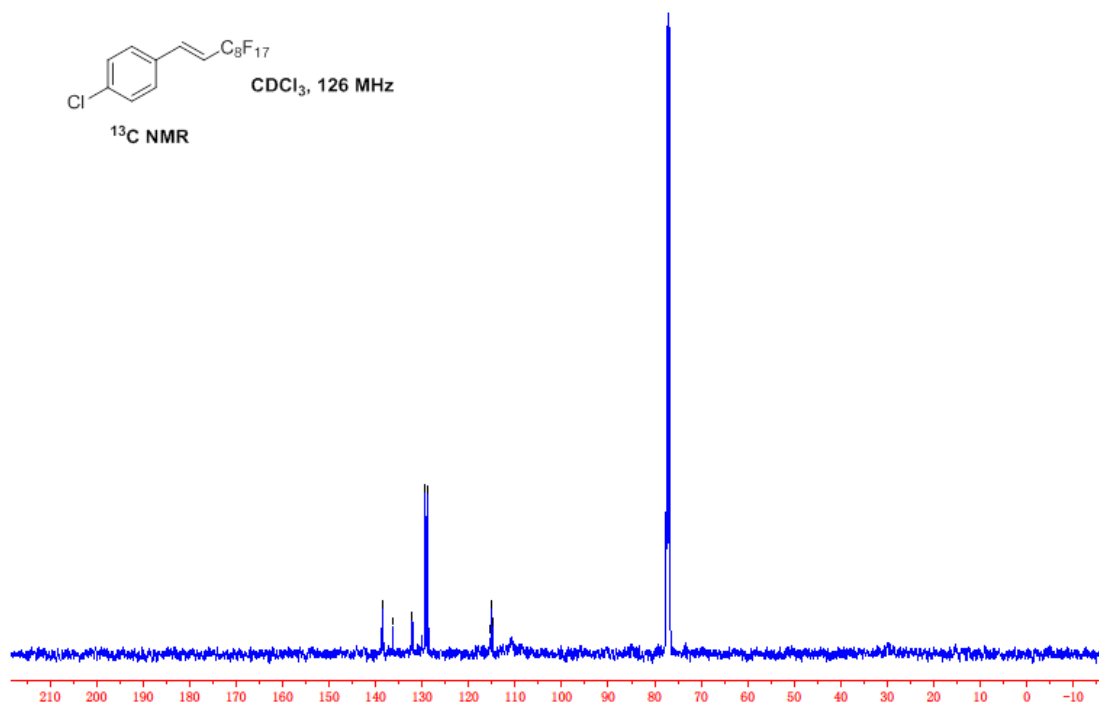

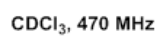<sup>19</sup>F NMR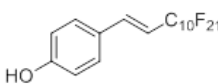

CDCl<sub>3</sub>, 500 MHz

<sup>1</sup>H NMR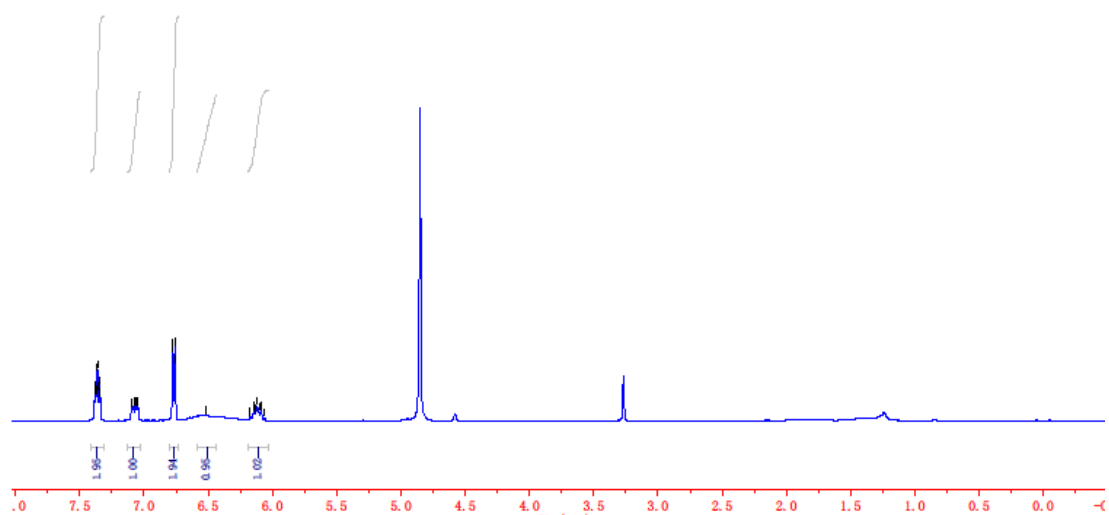

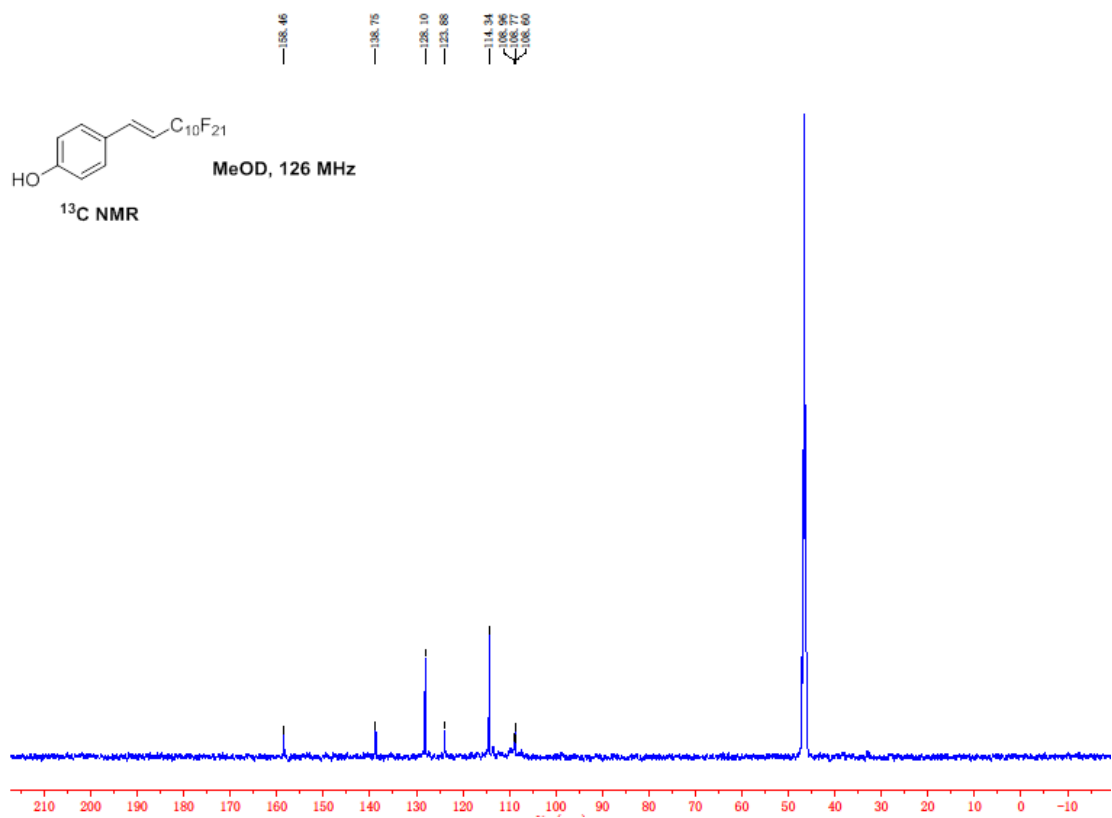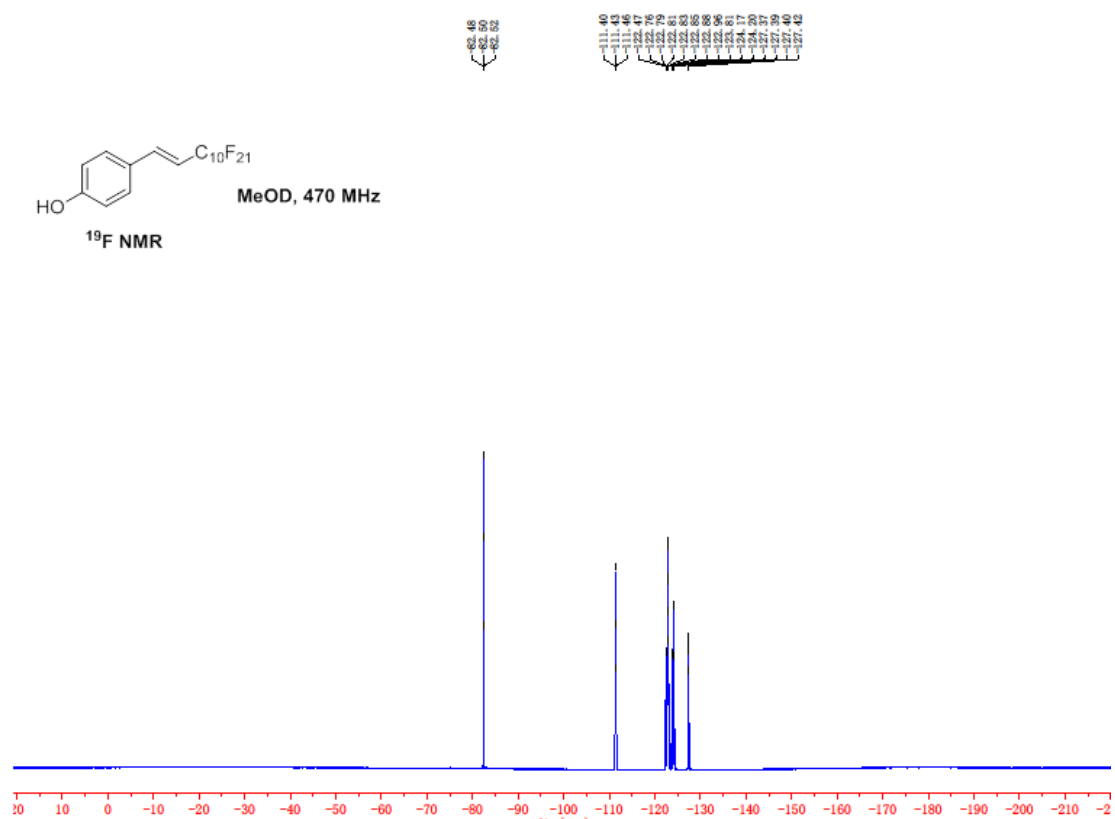

<sup>13</sup>C NMR peaks (ppm):  
 150.65, 149.65, 137.97, 137.73, 137.72, 137.36, 136.99, 136.73, 136.29, 135.91, 135.51, 135.08, 134.82, 134.62

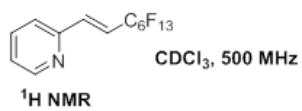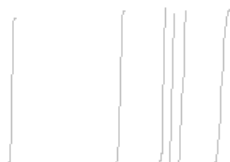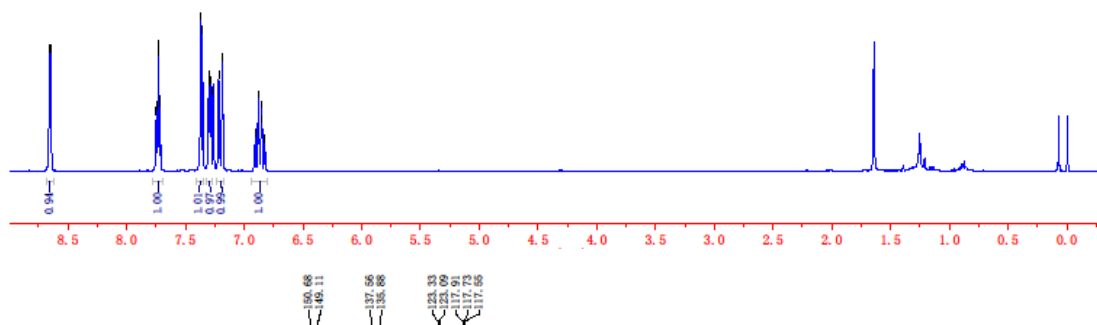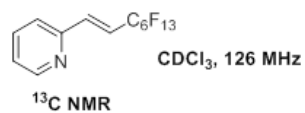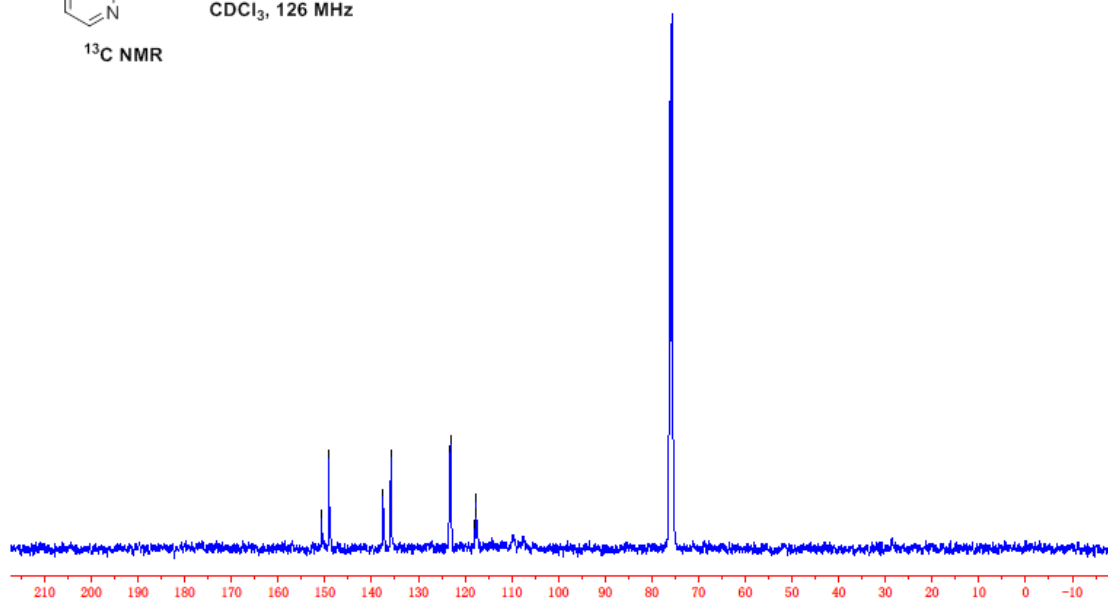

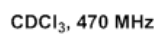<sup>19</sup>F NMR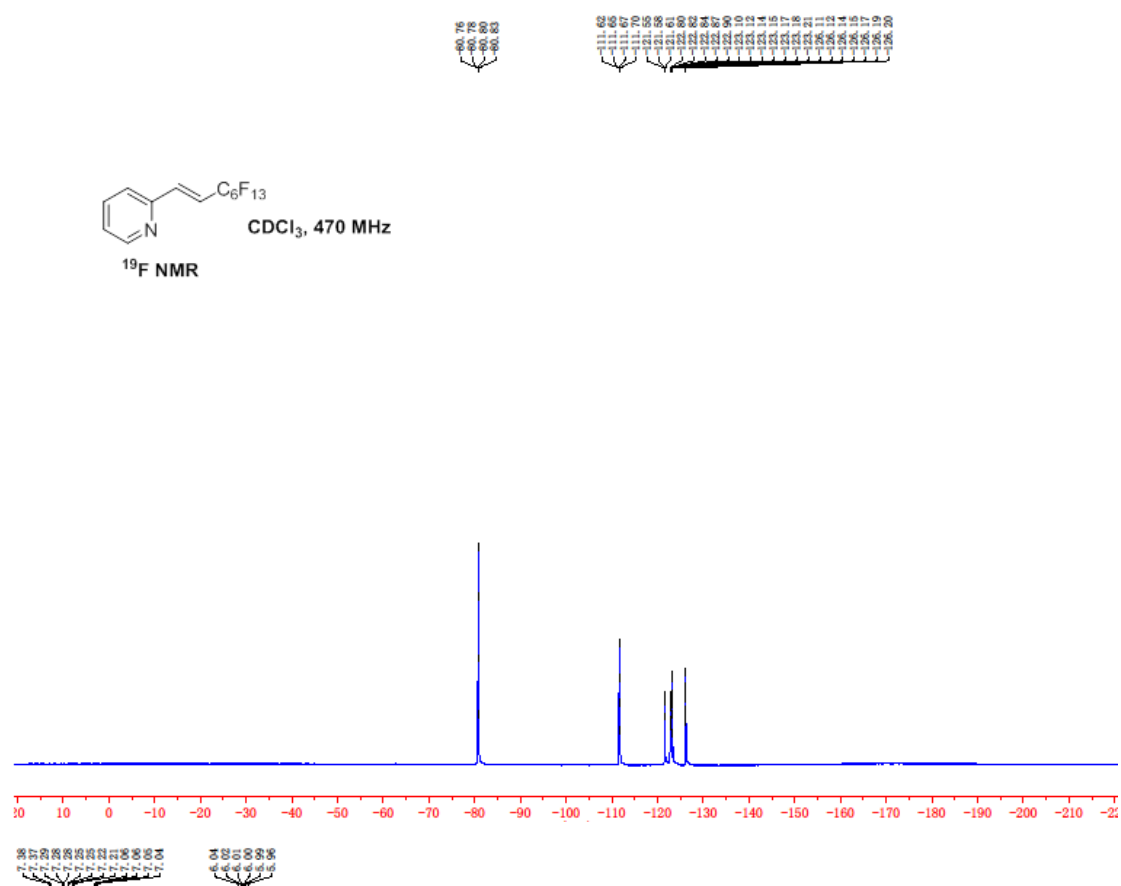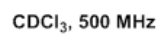<sup>1</sup>H NMR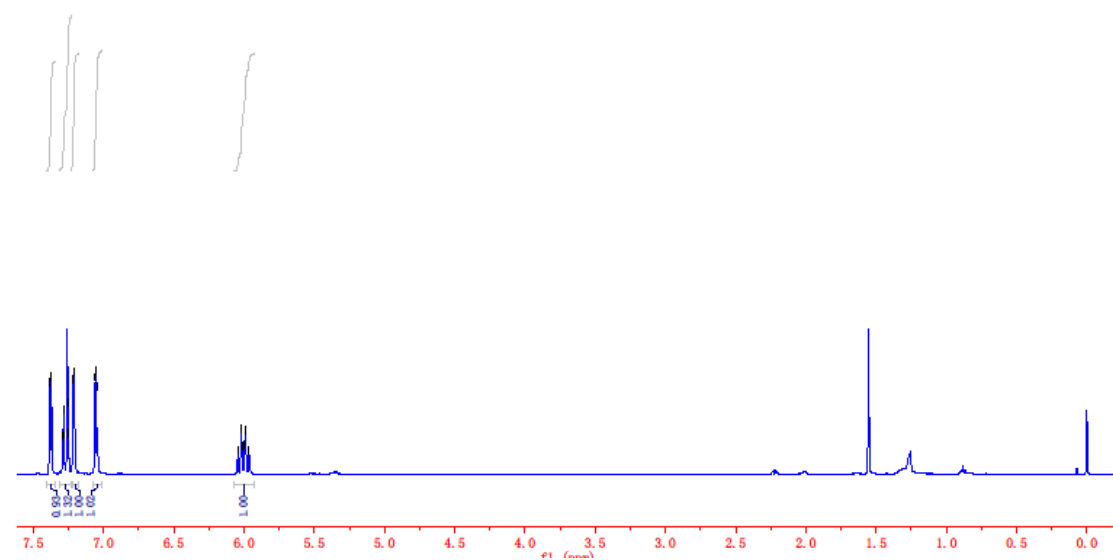

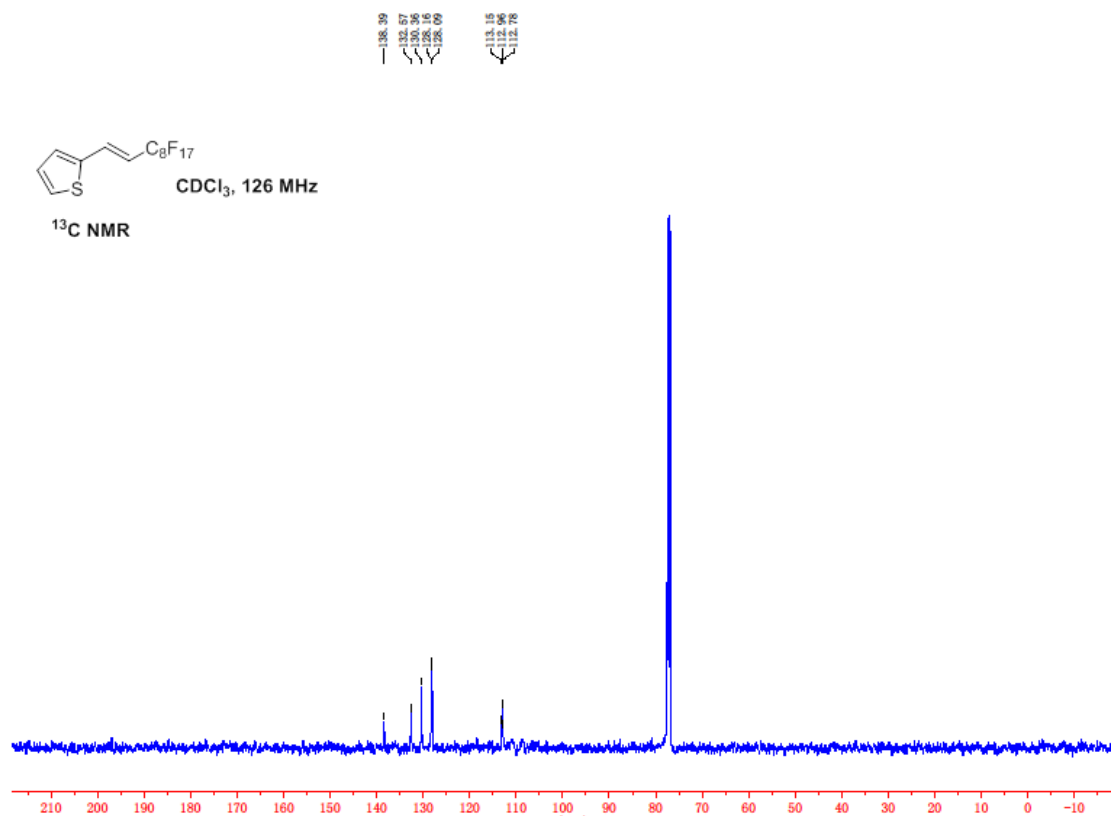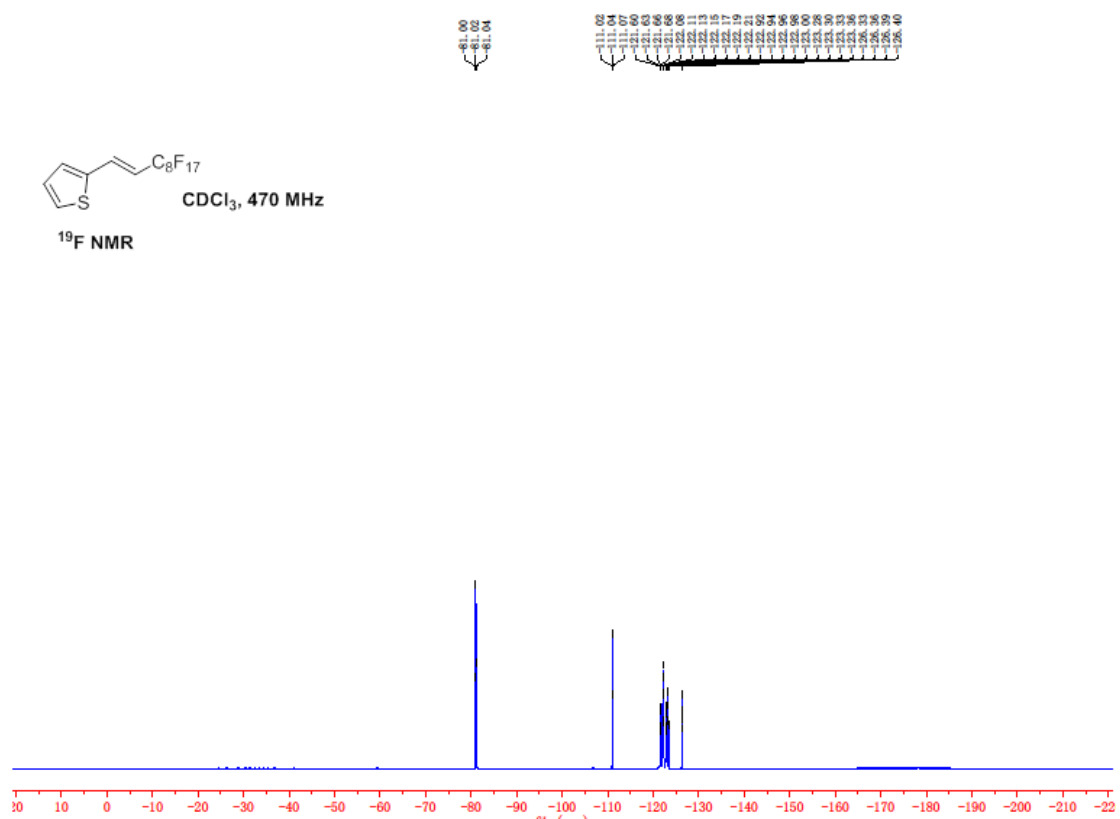

<sup>1</sup>H NMR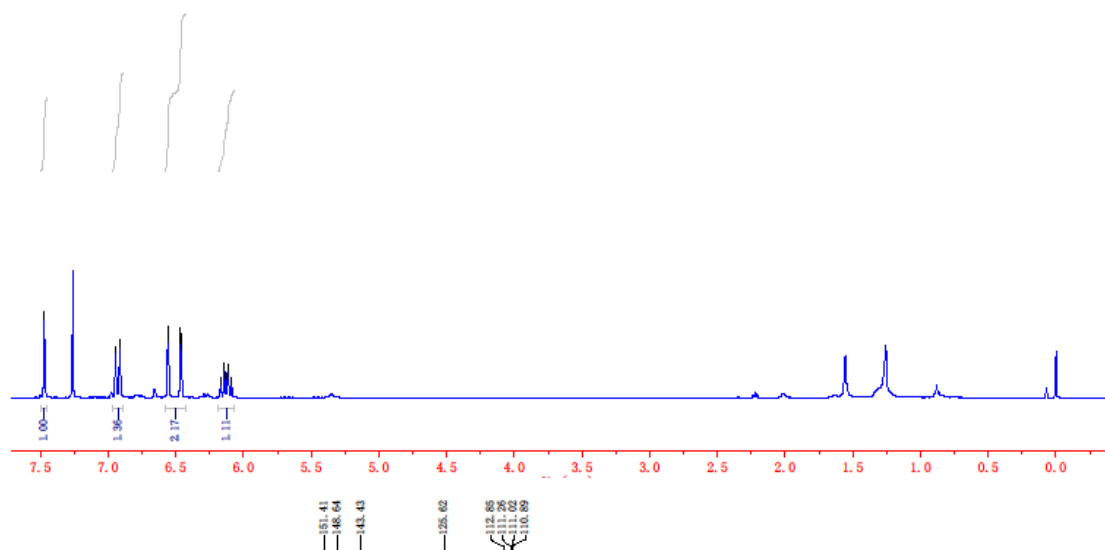

CDCl<sub>3</sub>, 126 MHz

<sup>13</sup>C NMR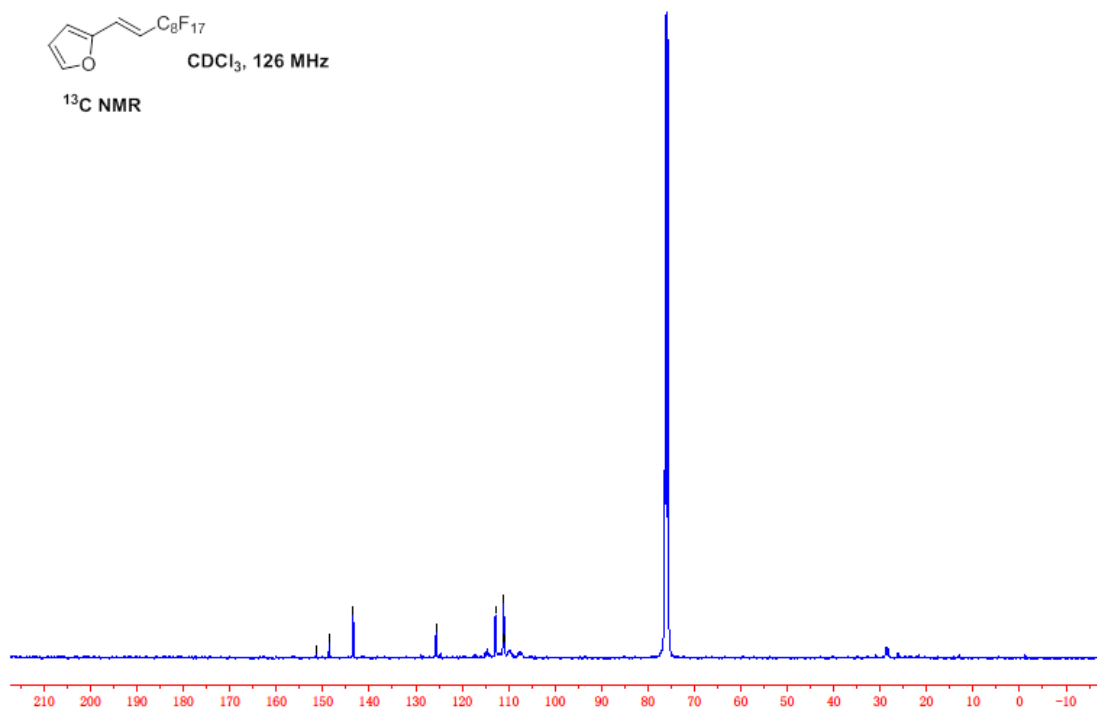



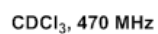

| Age group | Number of cases |
|-----------|-----------------|
| 0-4       | 60.72           |
| 5-9       | 60.75           |
| 10-14     | 60.77           |
| 15-19     | 11              |
| 20-24     | 33              |
| 25-29     | 36              |
| 30-34     | 39              |
| 35-39     | 85              |
| 40-44     | 87              |
| 45-49     | 88              |
| 50-54     | 91              |
| 55-59     | 93              |
| 60-64     | 96              |
| 65-69     | 97              |
| 70-74     | 67              |
| 75+       | 69              |
| 80+       | 73              |
| 85+       | 75              |
| 90+       | 11              |
| 95+       | 13              |
| 100+      | 15              |
| 105+      | 16              |
| 110+      | 10              |
| 115+      | 11              |
| 120+      | 13              |
| 125+      | 13              |
| 130+      | 14              |

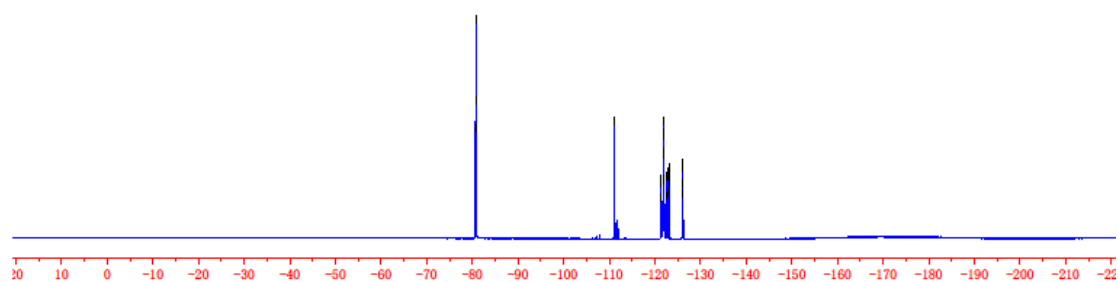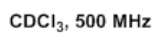

Figure 1 illustrates the hierarchical structure of the 2008 Beijing Olympic Games. The top level is '2008 Olympic Games', which branches into 'Summer Olympic Games' and 'Winter Olympic Games'. 'Summer Olympic Games' further branches into 'Beijing 2008 Olympic Games' and 'Beijing 2008 Paralympic Games'. 'Winter Olympic Games' branches into 'Beijing 2008 Winter Olympic Games' and 'Beijing 2008 Winter Paralympic Games'. Below these are the specific events: 'Beijing 2008 Olympic Games' includes 'Beijing 2008 Olympic Games' and 'Beijing 2008 Paralympic Games'. 'Beijing 2008 Paralympic Games' includes 'Beijing 2008 Paralympic Games' and 'Beijing 2008 Paralympic Games'. 'Beijing 2008 Winter Olympic Games' includes 'Beijing 2008 Winter Olympic Games' and 'Beijing 2008 Winter Paralympic Games'. 'Beijing 2008 Winter Paralympic Games' includes 'Beijing 2008 Winter Paralympic Games' and 'Beijing 2008 Winter Paralympic Games'. The bottom level shows the specific events: 'Beijing 2008 Olympic Games' includes 'Beijing 2008 Olympic Games' and 'Beijing 2008 Paralympic Games'. 'Beijing 2008 Paralympic Games' includes 'Beijing 2008 Paralympic Games' and 'Beijing 2008 Paralympic Games'. 'Beijing 2008 Winter Olympic Games' includes 'Beijing 2008 Winter Olympic Games' and 'Beijing 2008 Winter Paralympic Games'. 'Beijing 2008 Winter Paralympic Games' includes 'Beijing 2008 Winter Paralympic Games' and 'Beijing 2008 Winter Paralympic Games'.

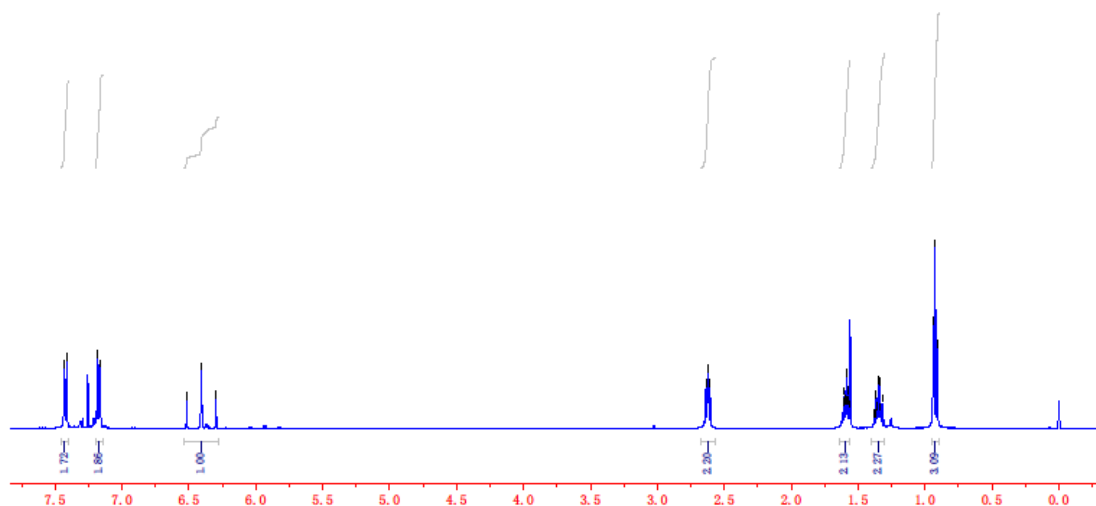

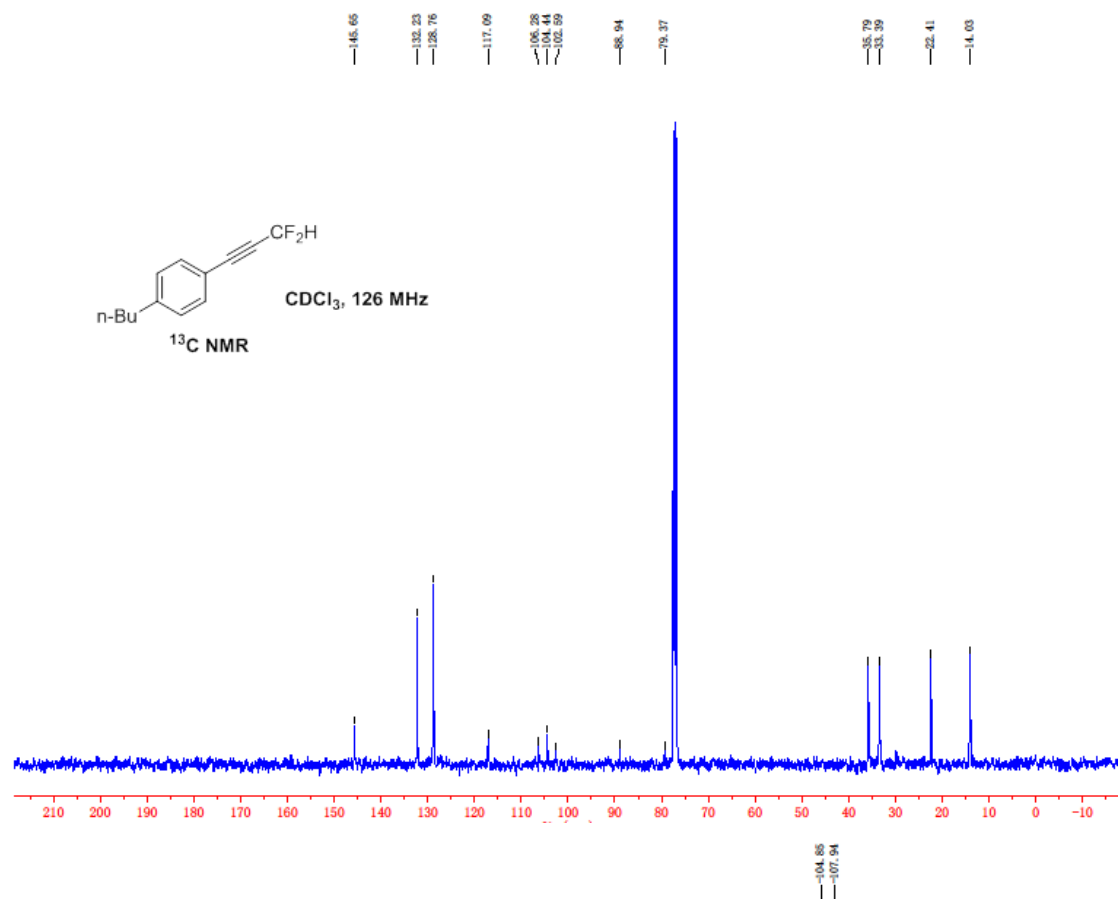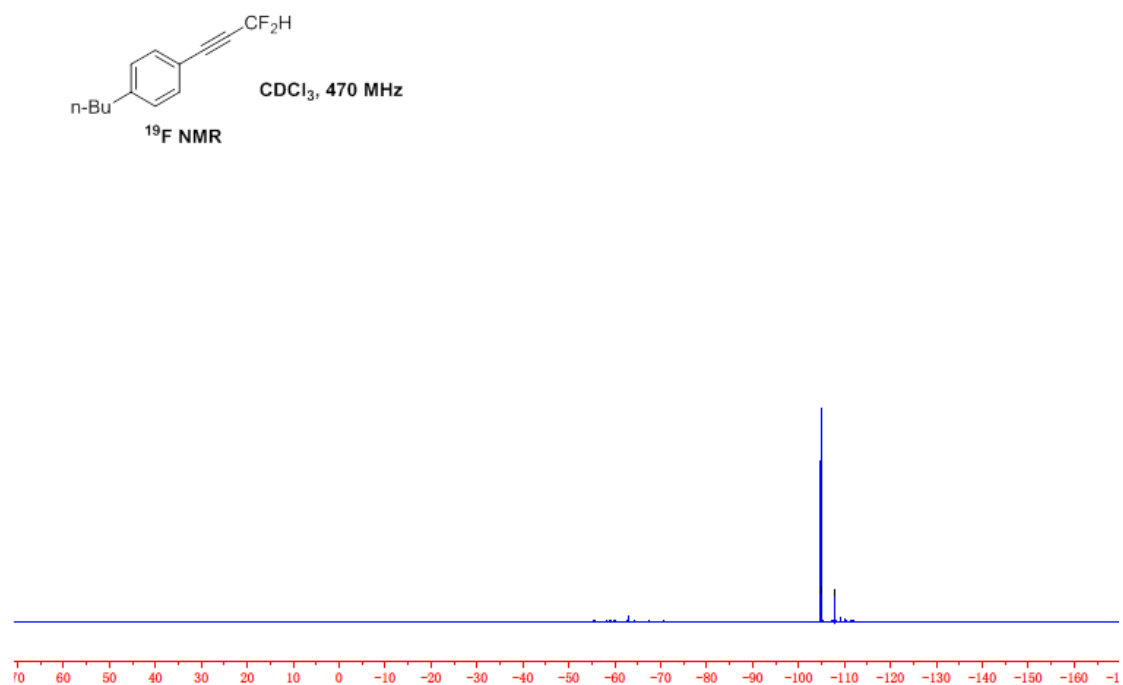

7.43, 7.42, 7.38, 7.37

5.21, 5.20

4.22, 4.21, 4.20, 4.19, 4.18, 4.17, 4.16, 4.15, 4.14, 4.13, 4.12, 4.11, 4.10, 4.09, 4.08, 4.07, 4.06, 4.05, 4.04, 4.03, 4.02, 4.01, 4.00, 3.99, 3.98, 3.97, 3.96, 3.95, 3.94, 3.93, 3.92, 3.91, 3.90, 3.89, 3.88, 3.87, 3.86, 3.85, 3.84, 3.83, 3.82, 3.81, 3.80, 3.79, 3.78, 3.77, 3.76, 3.75, 3.74, 3.73, 3.72, 3.71, 3.70, 3.69, 3.68, 3.67, 3.66, 3.65, 3.64, 3.63, 3.62, 3.61, 3.60, 3.59, 3.58, 3.57, 3.56, 3.55, 3.54, 3.53, 3.52, 3.51, 3.50, 3.49, 3.48, 3.47, 3.46, 3.45, 3.44, 3.43, 3.42, 3.41, 3.40, 3.39, 3.38, 3.37, 3.36, 3.35, 3.34, 3.33, 3.32, 3.31, 3.30, 3.29, 3.28, 3.27, 3.26, 3.25, 3.24, 3.23, 3.22, 3.21, 3.20, 3.19, 3.18, 3.17, 3.16, 3.15, 3.14, 3.13, 3.12, 3.11, 3.10, 3.09, 3.08, 3.07, 3.06, 3.05, 3.04, 3.03, 3.02, 3.01, 3.00, 2.99, 2.98, 2.97, 2.96, 2.95, 2.94, 2.93, 2.92, 2.91, 2.90, 2.89, 2.88, 2.87, 2.86, 2.85, 2.84, 2.83, 2.82, 2.81, 2.80, 2.79, 2.78, 2.77, 2.76, 2.75, 2.74, 2.73, 2.72, 2.71, 2.70, 2.69, 2.68, 2.67, 2.66, 2.65, 2.64, 2.63, 2.62, 2.61, 2.60, 2.59, 2.58, 2.57, 2.56, 2.55, 2.54, 2.53, 2.52, 2.51, 2.50, 2.49, 2.48, 2.47, 2.46, 2.45, 2.44, 2.43, 2.42, 2.41, 2.40, 2.39, 2.38, 2.37, 2.36, 2.35, 2.34, 2.33, 2.32, 2.31, 2.30, 2.29, 2.28, 2.27, 2.26, 2.25, 2.24, 2.23, 2.22, 2.21, 2.20, 2.19, 2.18, 2.17, 2.16, 2.15, 2.14, 2.13, 2.12, 2.11, 2.10, 2.09, 2.08, 2.07, 2.06, 2.05, 2.04, 2.03, 2.02, 2.01, 2.00, 1.99, 1.98, 1.97, 1.96, 1.95, 1.94, 1.93, 1.92, 1.91, 1.90, 1.89, 1.88, 1.87, 1.86, 1.85, 1.84, 1.83, 1.82, 1.81, 1.80, 1.79, 1.78, 1.77, 1.76, 1.75, 1.74, 1.73, 1.72, 1.71, 1.70, 1.69, 1.68, 1.67, 1.66, 1.65, 1.64, 1.63, 1.62, 1.61, 1.60, 1.59, 1.58, 1.57, 1.56, 1.55, 1.54, 1.53, 1.52, 1.51, 1.50, 1.49, 1.48, 1.47, 1.46, 1.45, 1.44, 1.43, 1.42, 1.41, 1.40, 1.39, 1.38, 1.37, 1.36, 1.35, 1.34, 1.33, 1.32, 1.31, 1.30, 1.29, 1.28, 1.27, 1.26, 1.25, 1.24, 1.23, 1.22, 1.21, 1.20, 1.19, 1.18, 1.17, 1.16, 1.15, 1.14, 1.13, 1.12, 1.11, 1.10, 1.09, 1.08, 1.07, 1.06, 1.05, 1.04, 1.03, 1.02, 1.01, 1.00, 0.99, 0.98, 0.97, 0.96, 0.95, 0.94, 0.93, 0.92, 0.91, 0.90, 0.89, 0.88, 0.87, 0.86, 0.85, 0.84, 0.83, 0.82, 0.81, 0.80, 0.79, 0.78, 0.77, 0.76, 0.75, 0.74, 0.73, 0.72, 0.71, 0.70, 0.69, 0.68, 0.67, 0.66, 0.65, 0.64, 0.63, 0.62, 0.61, 0.60, 0.59, 0.58, 0.57, 0.56, 0.55, 0.54, 0.53, 0.52, 0.51, 0.50, 0.49, 0.48, 0.47, 0.46, 0.45, 0.44, 0.43, 0.42, 0.41, 0.40, 0.39, 0.38, 0.37, 0.36, 0.35, 0.34, 0.33, 0.32, 0.31, 0.30, 0.29, 0.28, 0.27, 0.26, 0.25, 0.24, 0.23, 0.22, 0.21, 0.20, 0.19, 0.18, 0.17, 0.16, 0.15, 0.14, 0.13, 0.12, 0.11, 0.10, 0.09, 0.08, 0.07, 0.06, 0.05, 0.04, 0.03, 0.02, 0.01, 0.00

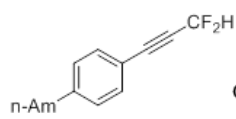

CDCl<sub>3</sub>, 500MHz

<sup>1</sup>H NMR

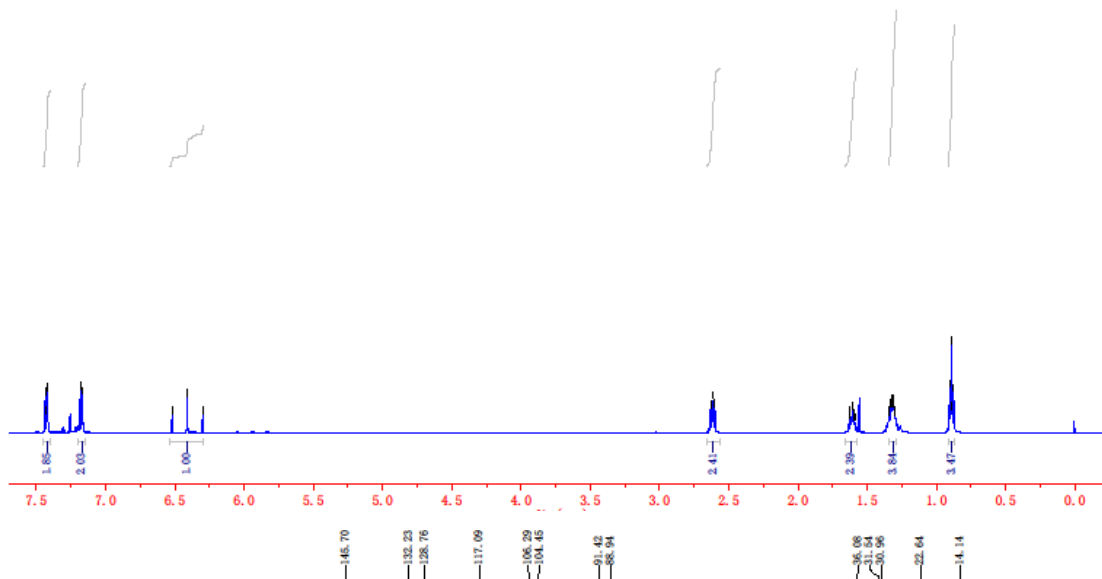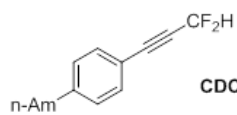

CDCl<sub>3</sub>, 126 MHz

<sup>13</sup>C NMR

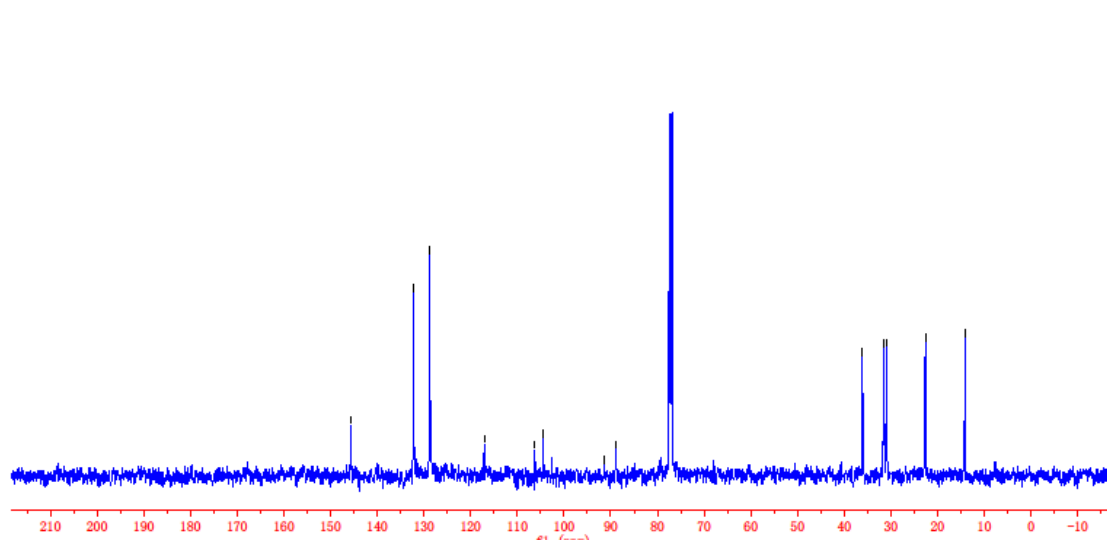

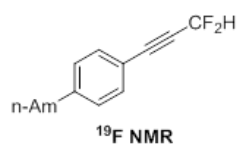

CDCl<sub>3</sub>, 470 MHz

-104.85  
 -107.93

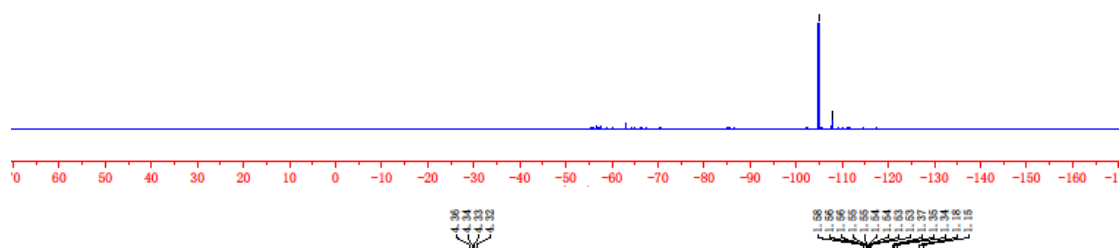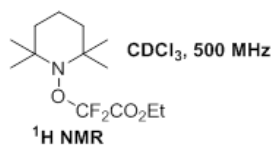

CDCl<sub>3</sub>, 500 MHz

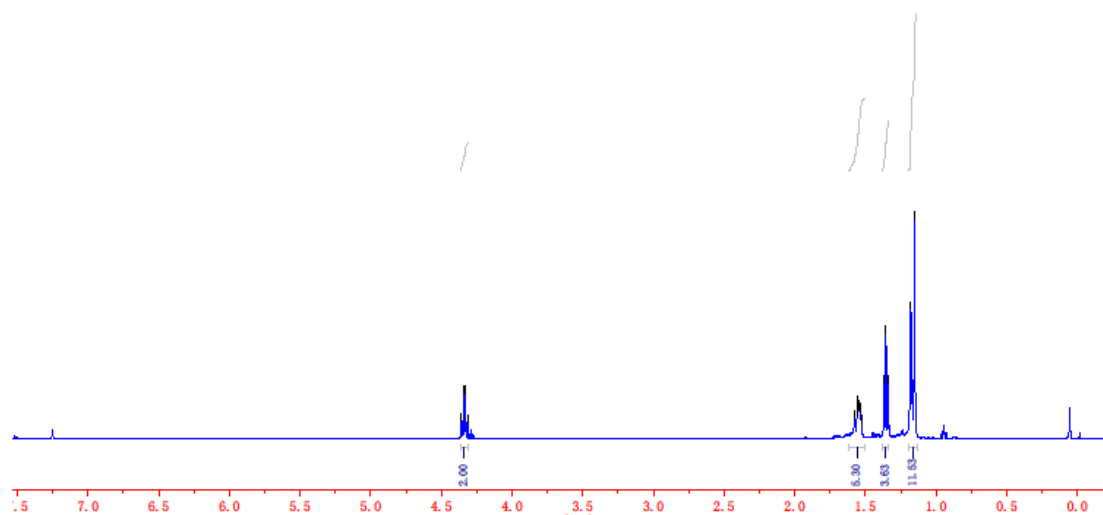

160.04  
159.71  
158.37

129.89  
127.81

116.63  
114.47  
112.31

61.99  
60.36

39.17  
32.40

19.73  
15.89

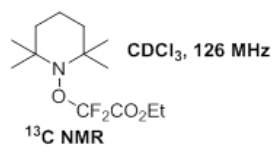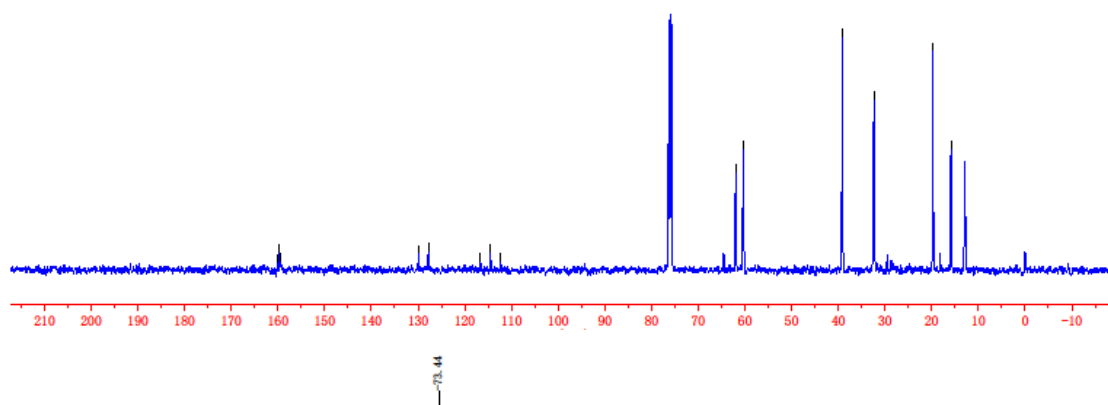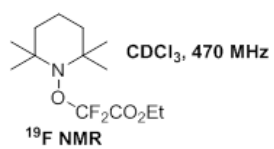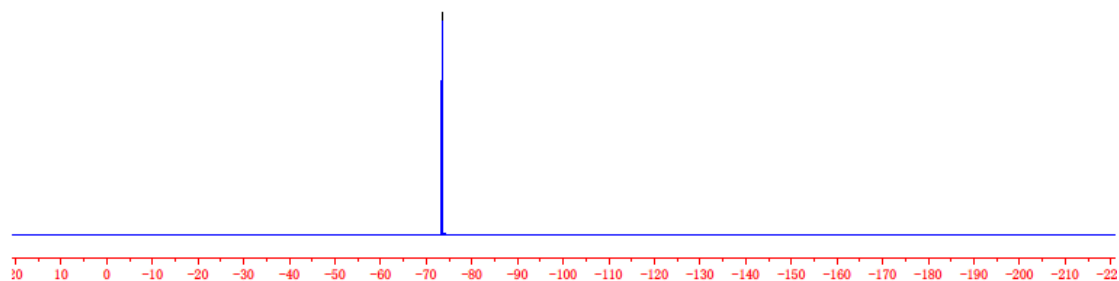



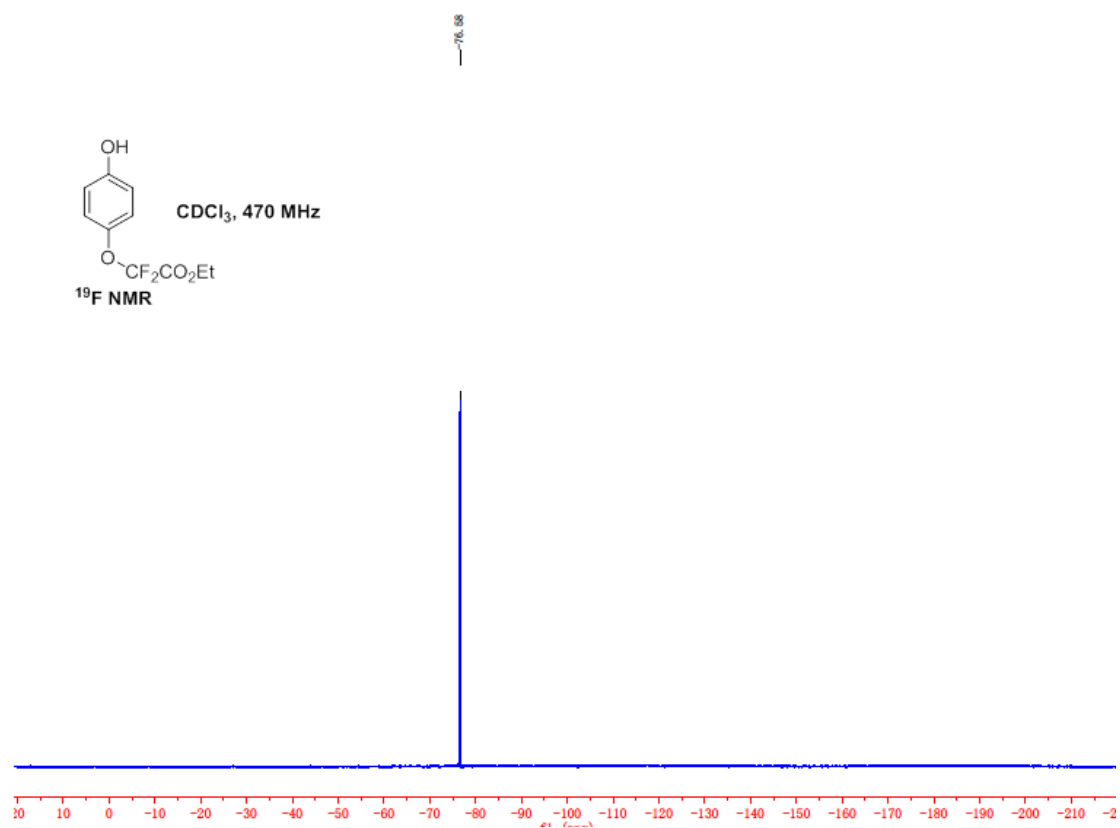

Supplement: c7ob00641a2.pdf [file c7ob00641a2.pdf]
